# Supplementary material for: Salinity tolerance loci revealed in rice using high-throughput non-invasive phenotyping
Source: PubMed Central journal article supplement (PMC5118543; doi:10.1038/ncomms13342), 2016-11-17
Supplement: ncomms13342-s1.pdf [file ncomms13342-s1.pdf]

**a**

*indica*

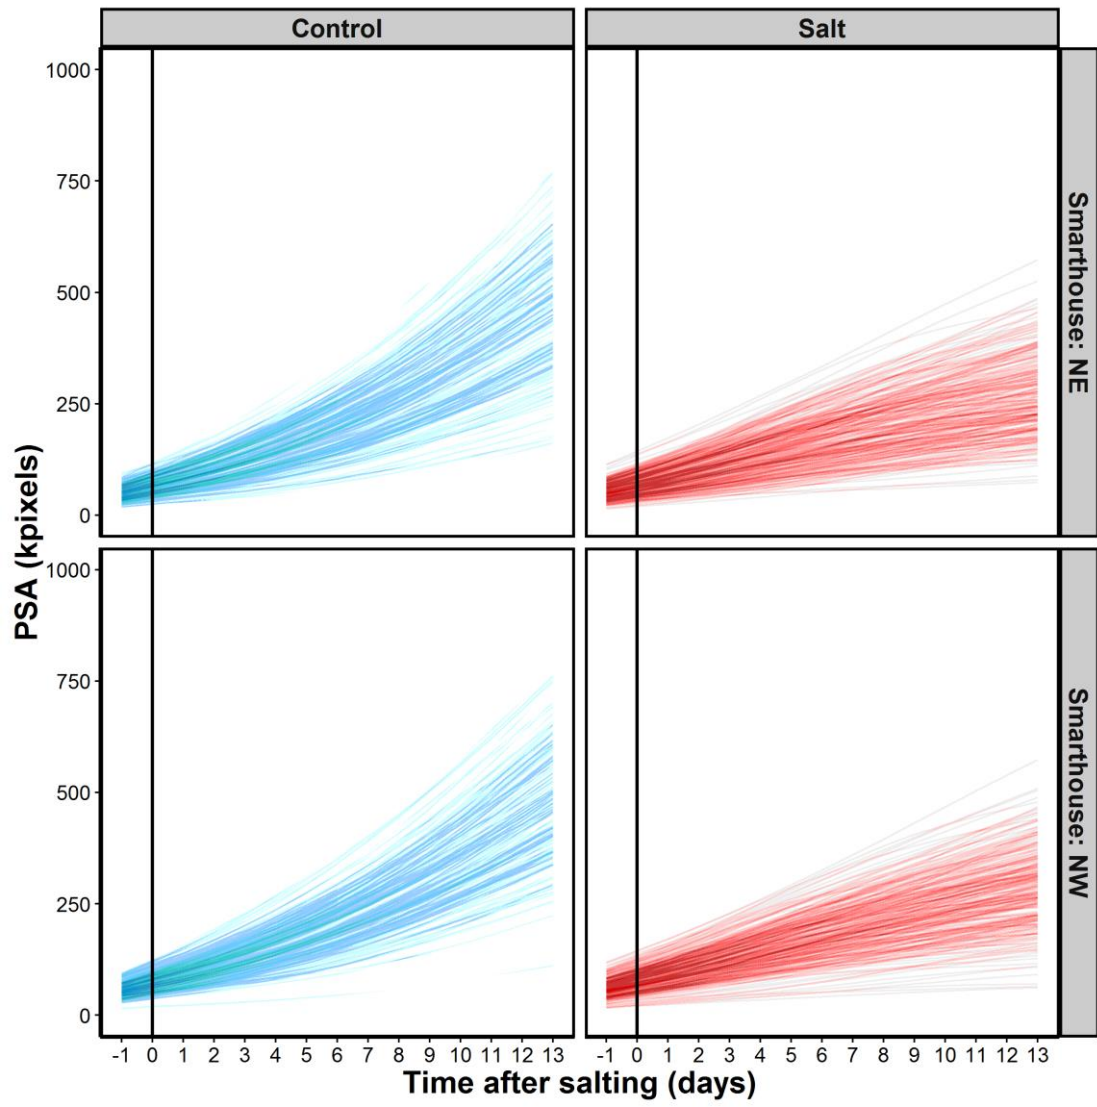

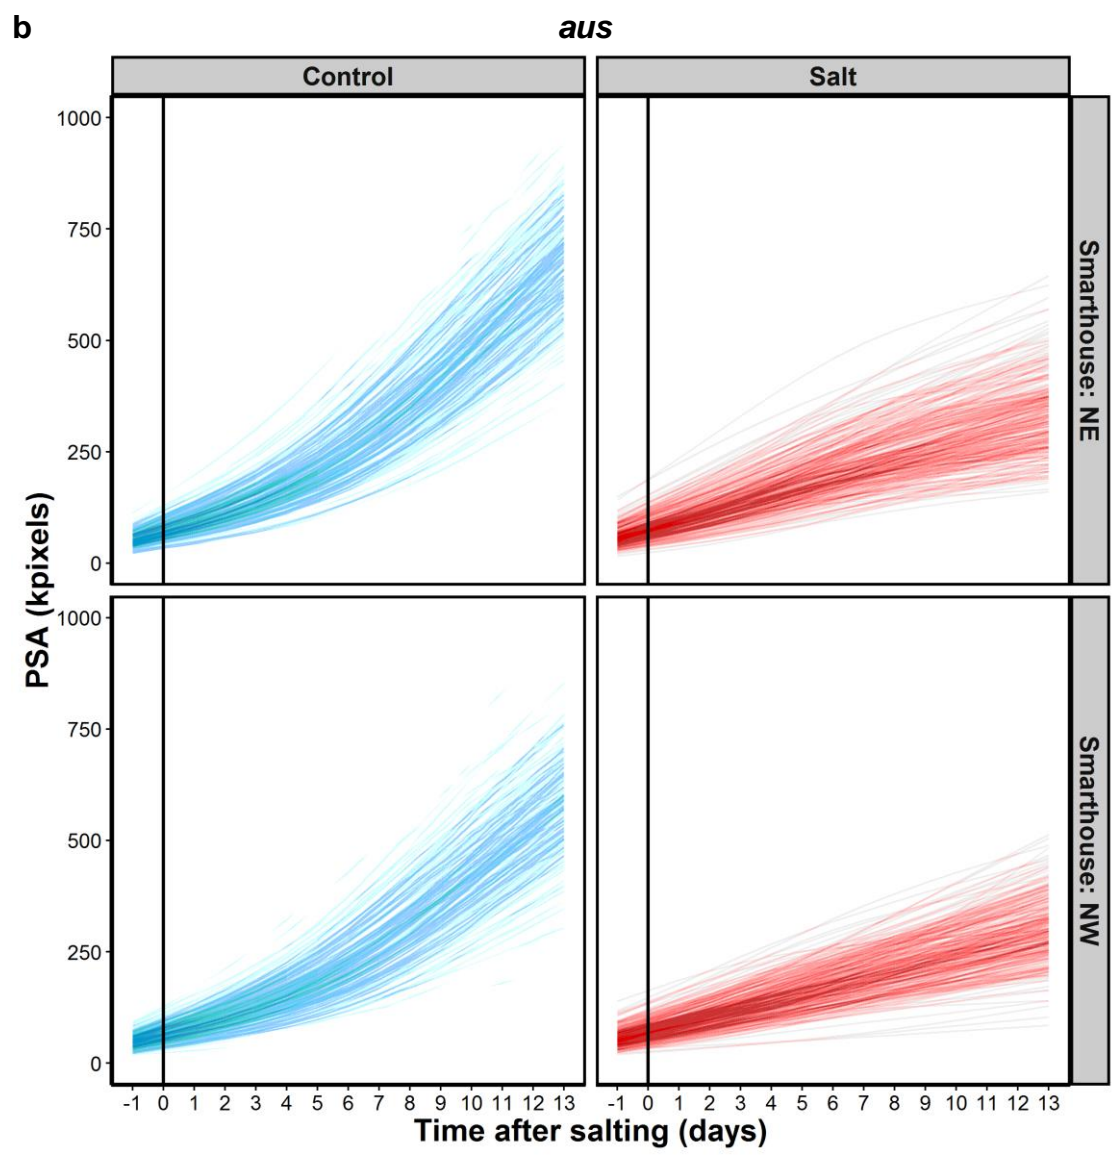

**c**

*indica*

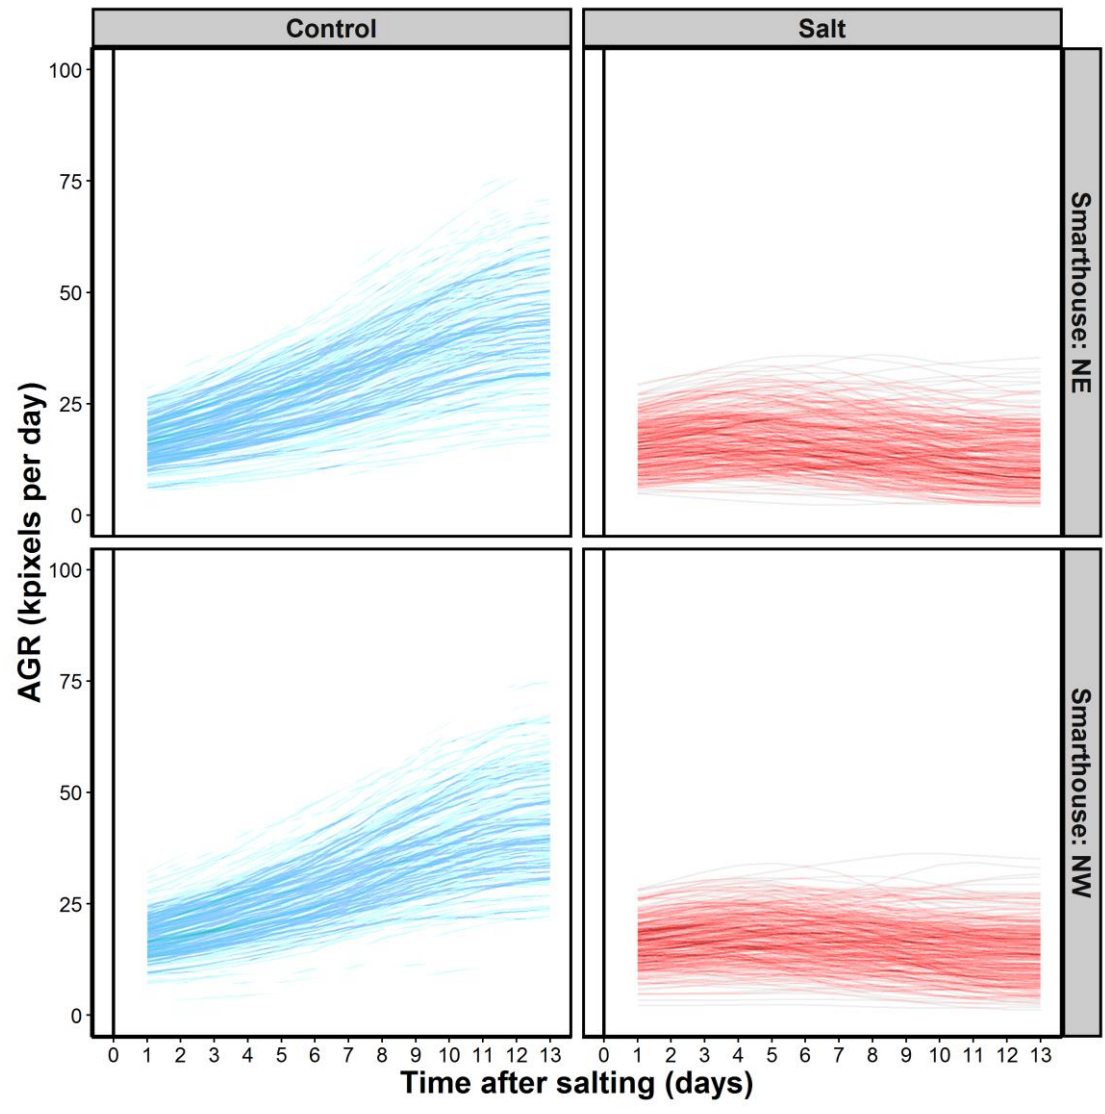





e

*indica*

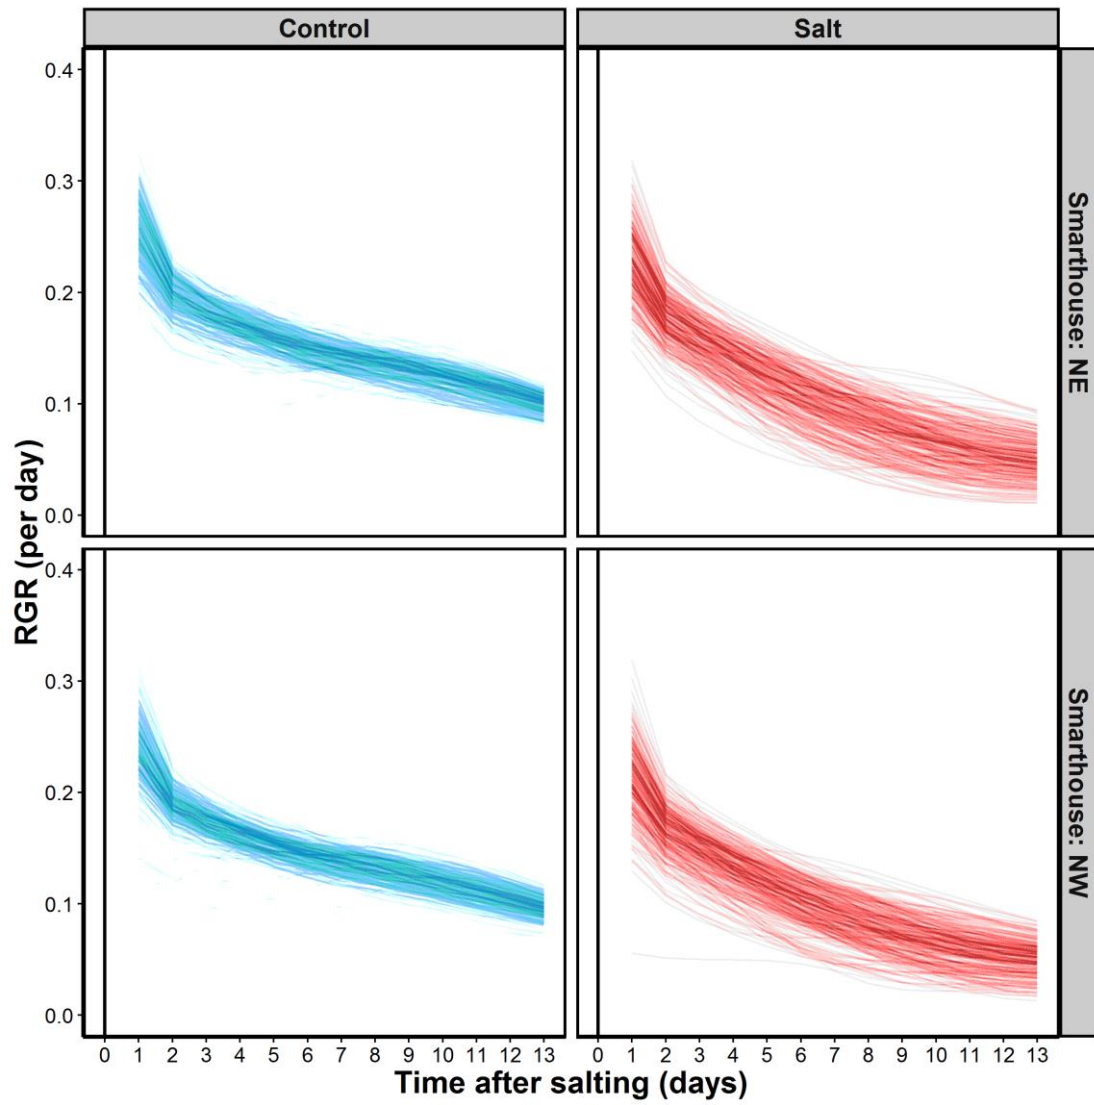

f

*aus*

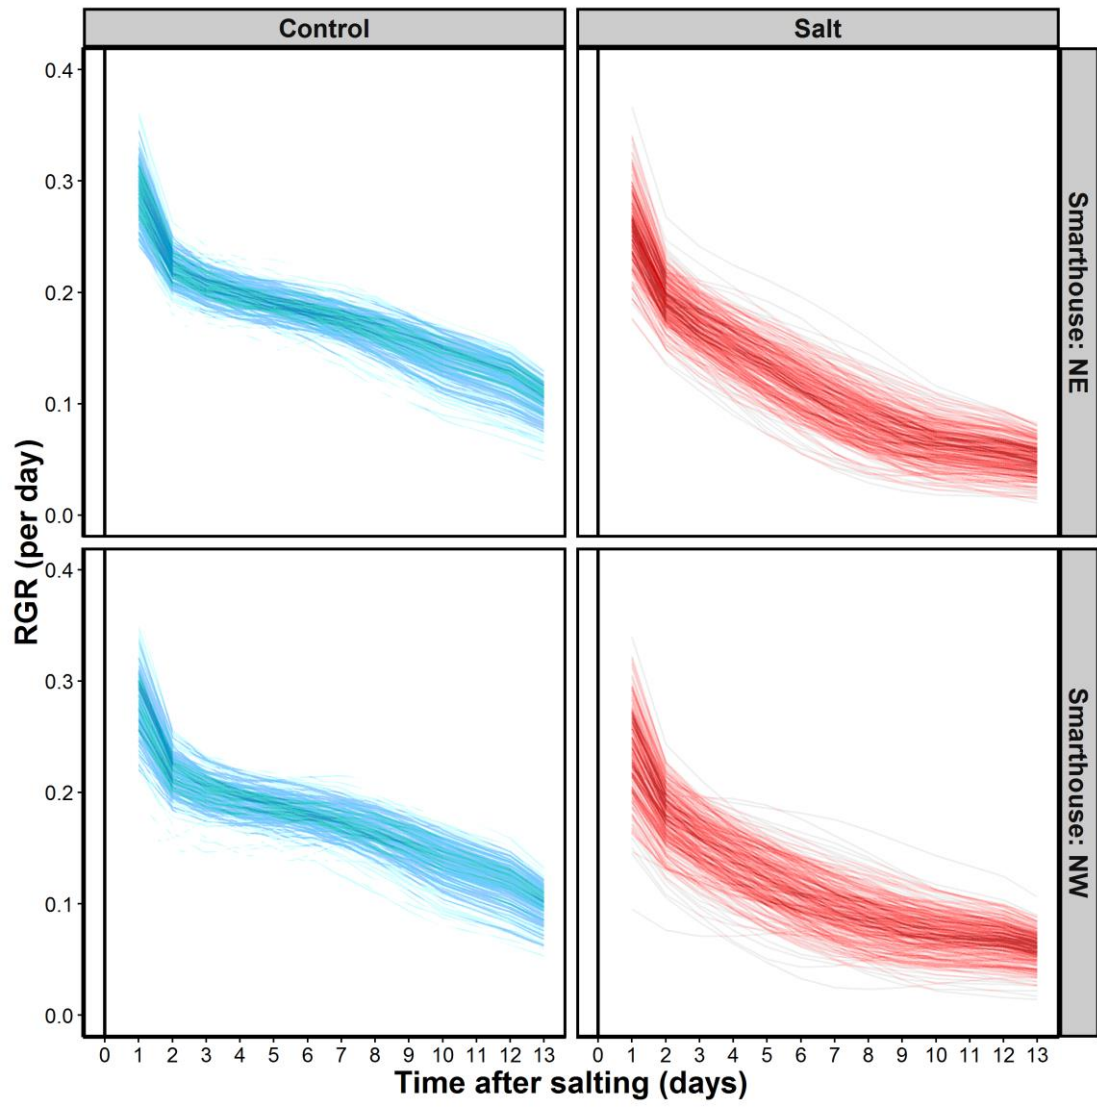

**g**

*indica*

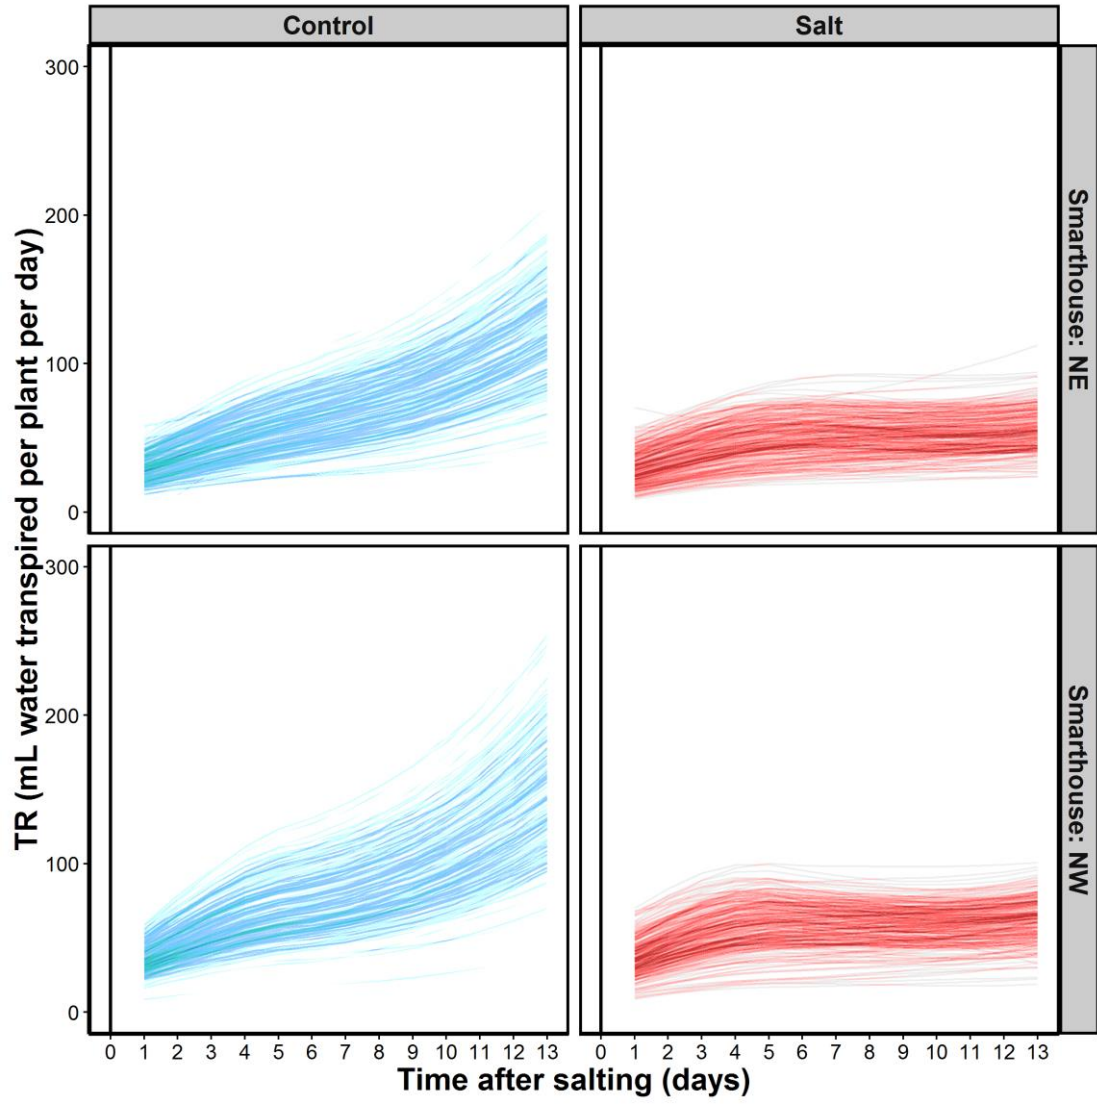

**h**

*aus*

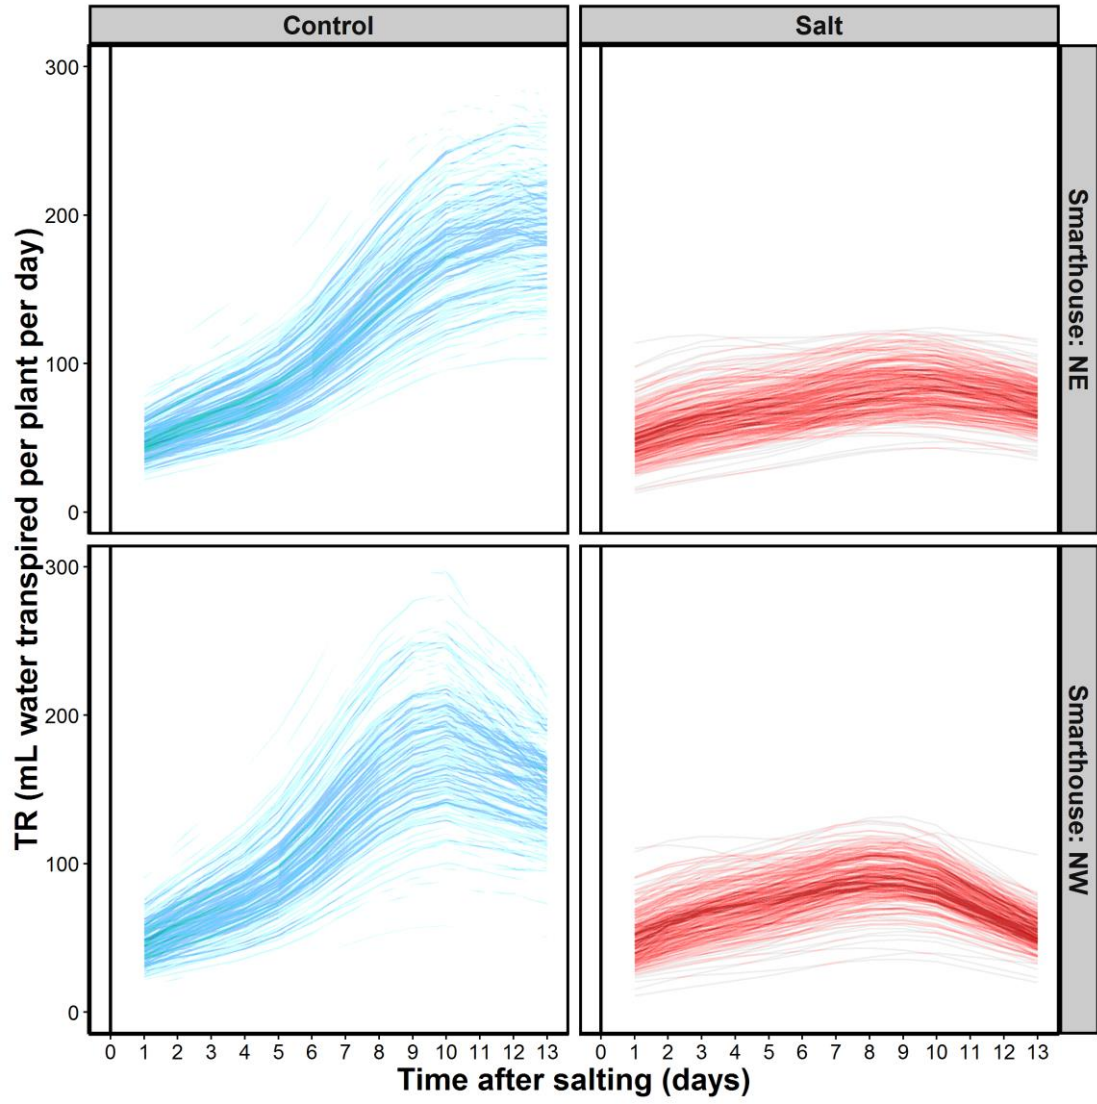

**i**

*indica*

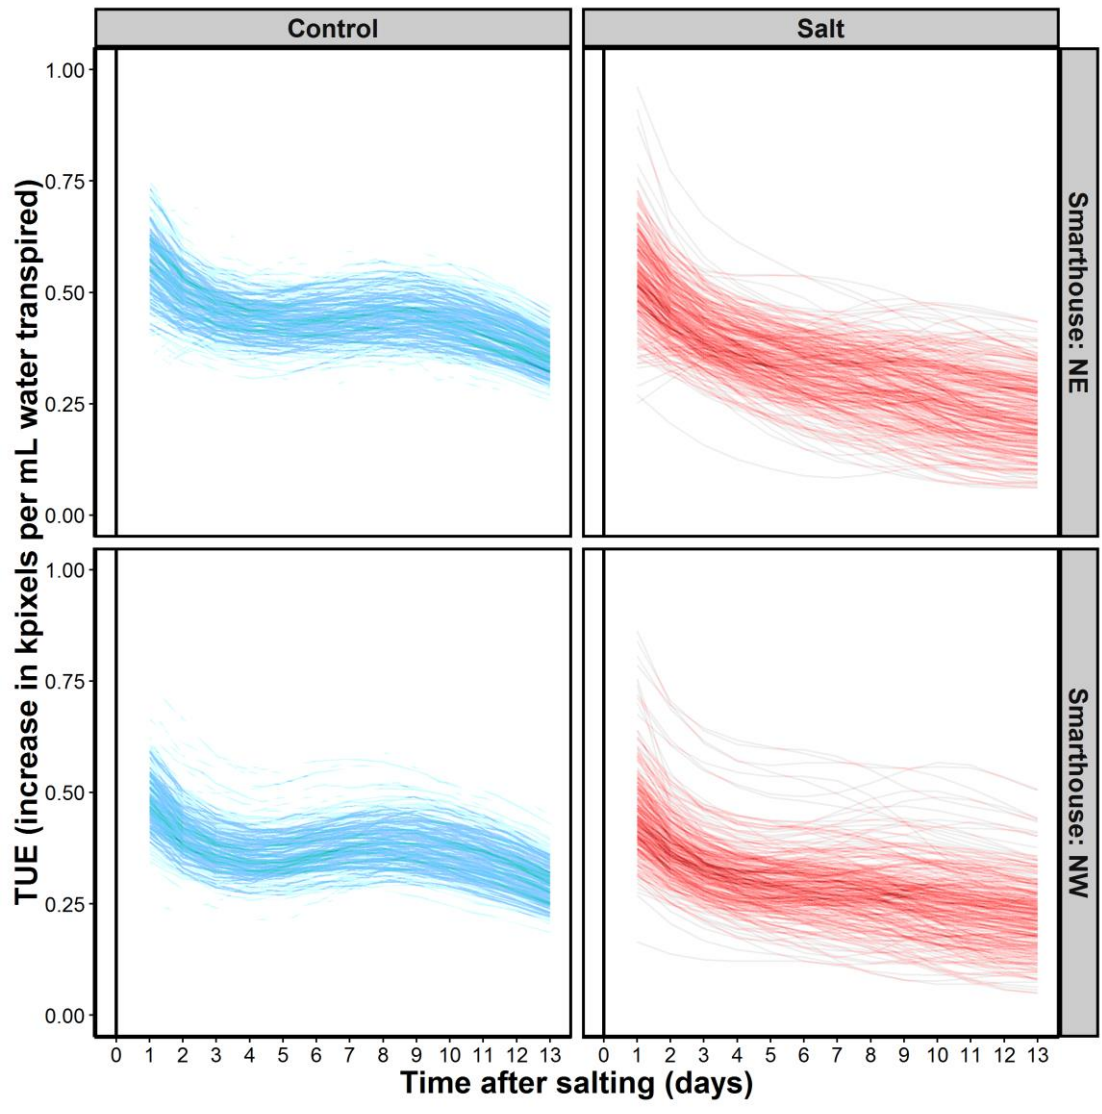

j

*aus*

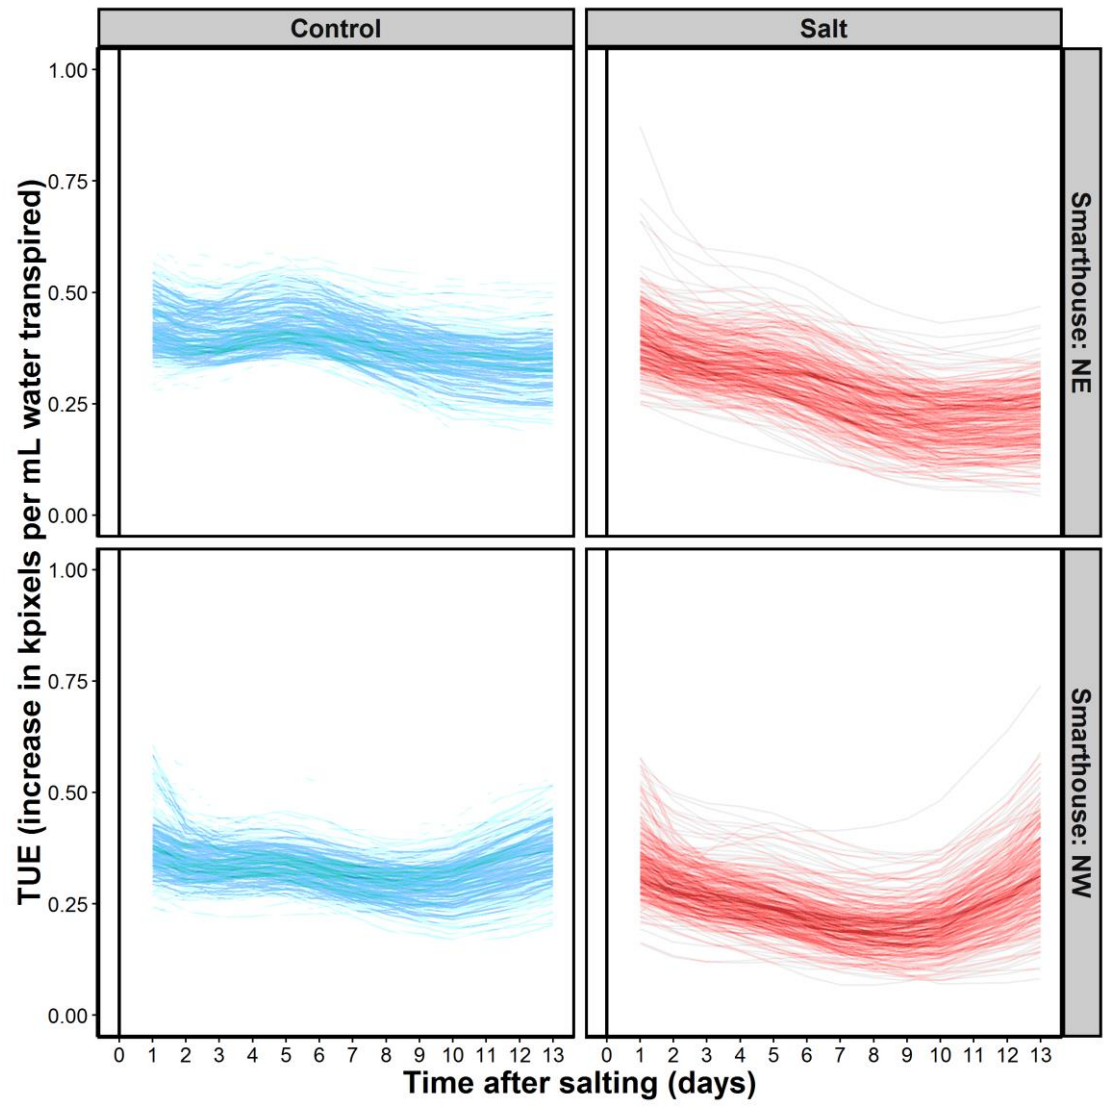

**k**

*indica*

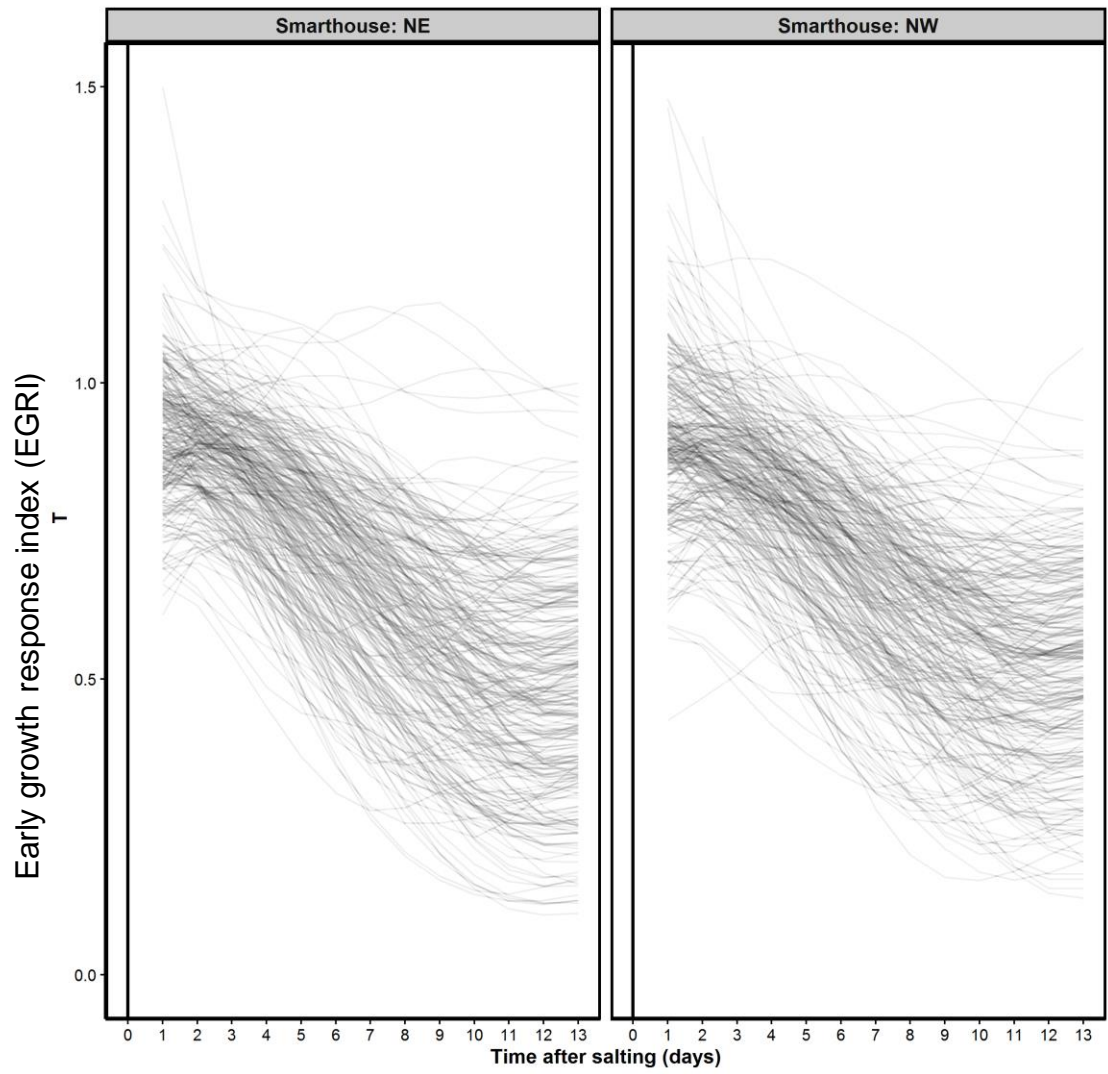



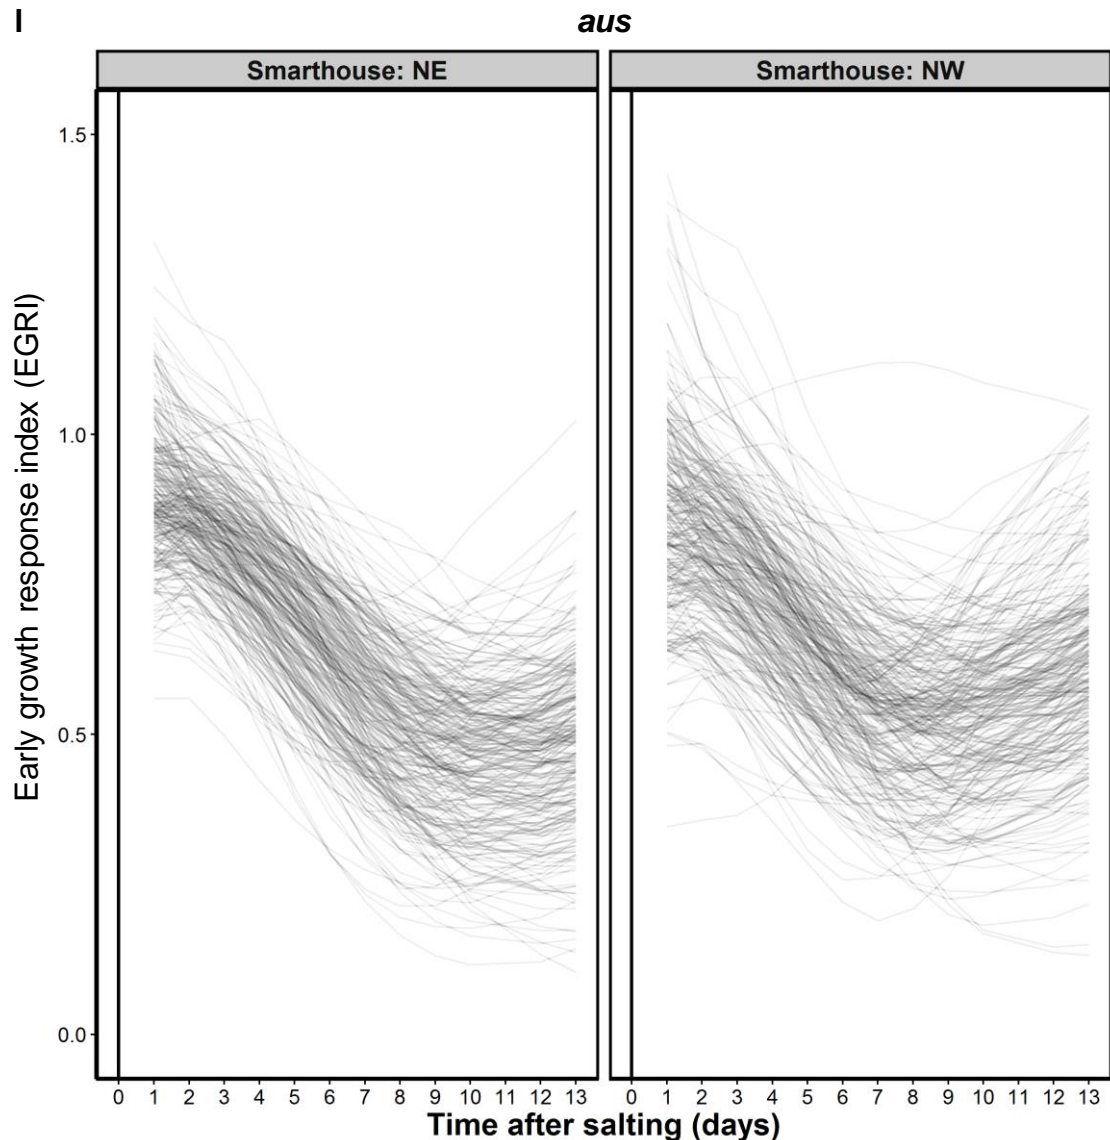

**Supplementary Figure 1: Cubic spline lines for the values of each parameter for each individual plant for *indica* and *aus* in each Smarthouse.**

(a) Splines of projected shoot area (PSA) for each individual plant of the *indica* panel. (b) As in a, with the *aus* panel. (c) Splines of absolute growth rate (AGR) for each individual plant of the *indica* panel. (d) As in c, with the *aus* panel. (e) Splines of relative growth rate (RGR) for each individual plant of the *indica* panel. (f) As in e, with the *aus* panel. (g) Splines of transpiration rate (TR) for each individual plant of the *indica* panel. (h) As in g, with the *aus* panel. (i) Splines of transpiration use efficiency (TUE) for each individual plant of the *indica* panel. (j) As i, with the *aus* panel. Lines represent control conditions (blue) and saline conditions (red) for each

plant (**k**) Splines of early growth response index (EGRI) index for each individual plant of the *indica* panel. (**l**) As in **k**, with the *aus* panel.

**a**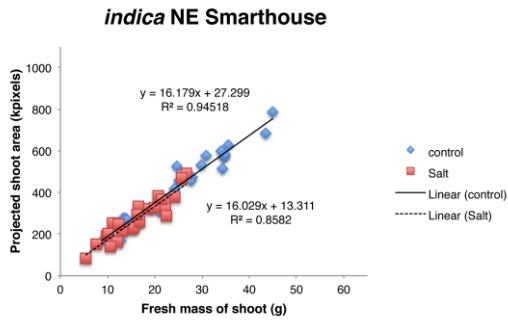**b**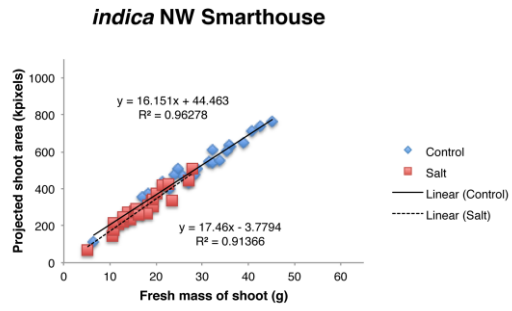**c**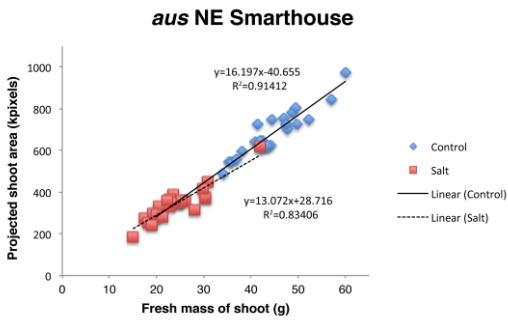**d**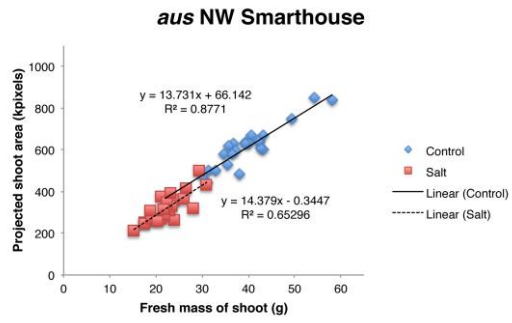**e**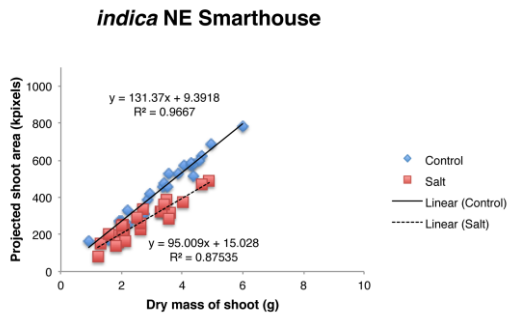**f**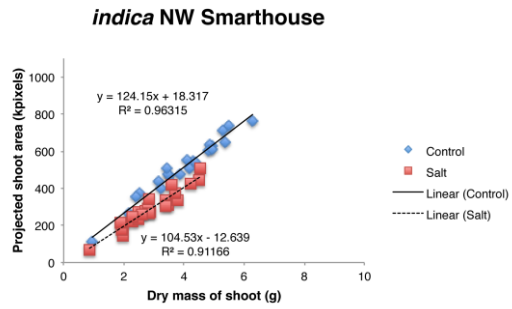**g**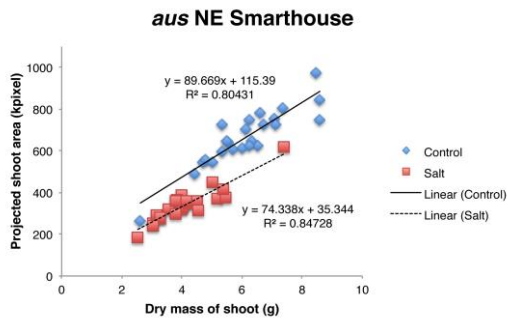**h**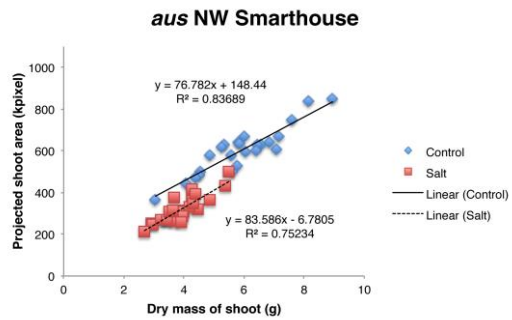

**Supplementary Figure 2: Scatter plots relating projected shoot area (PSA) to shoot fresh mass and shoot dry mass.**

**(a-d)** 24 control treated plants (blue) and 24 salt treated plants (red) were harvested on the last day of the experiment from each rice panel, *indica* and *aus*, in each Smarthouse (NE and NW). A positive linear relationship between projected shoot area PSA (kpixel) and shoot fresh mass was observed in both rice panels in each Smarthouse. **(e-h)** As in **a-d**, with PSA related to shoot dry mass.

a

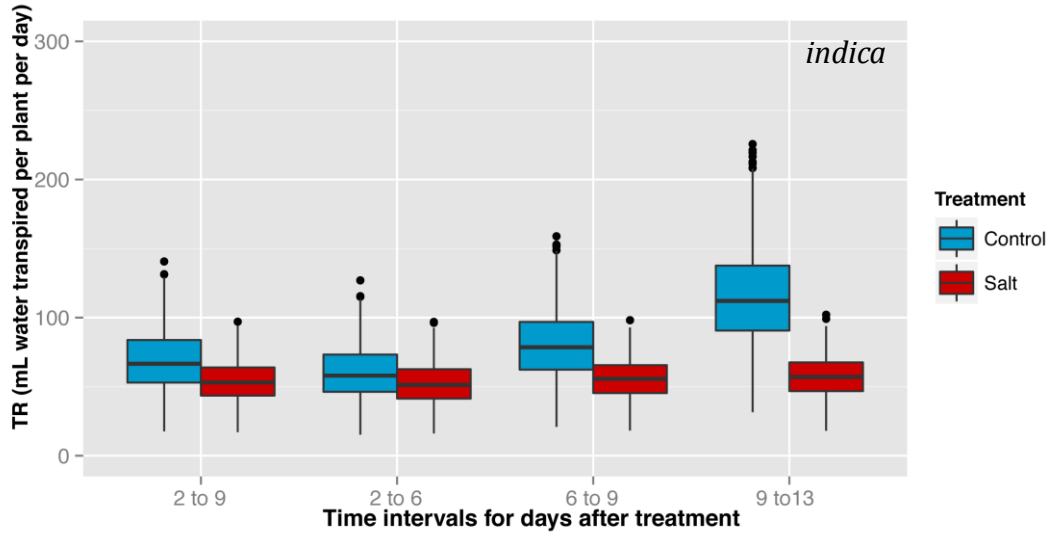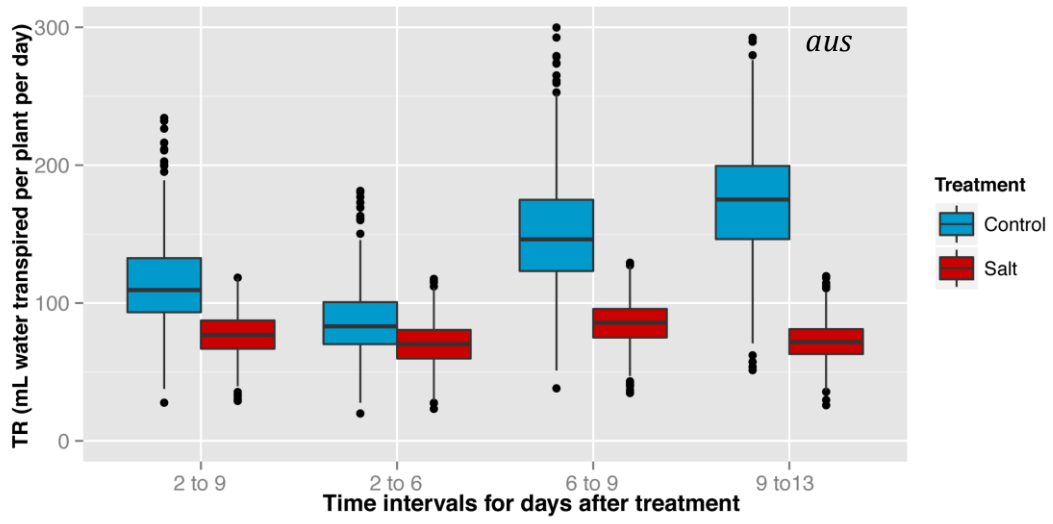

**b**

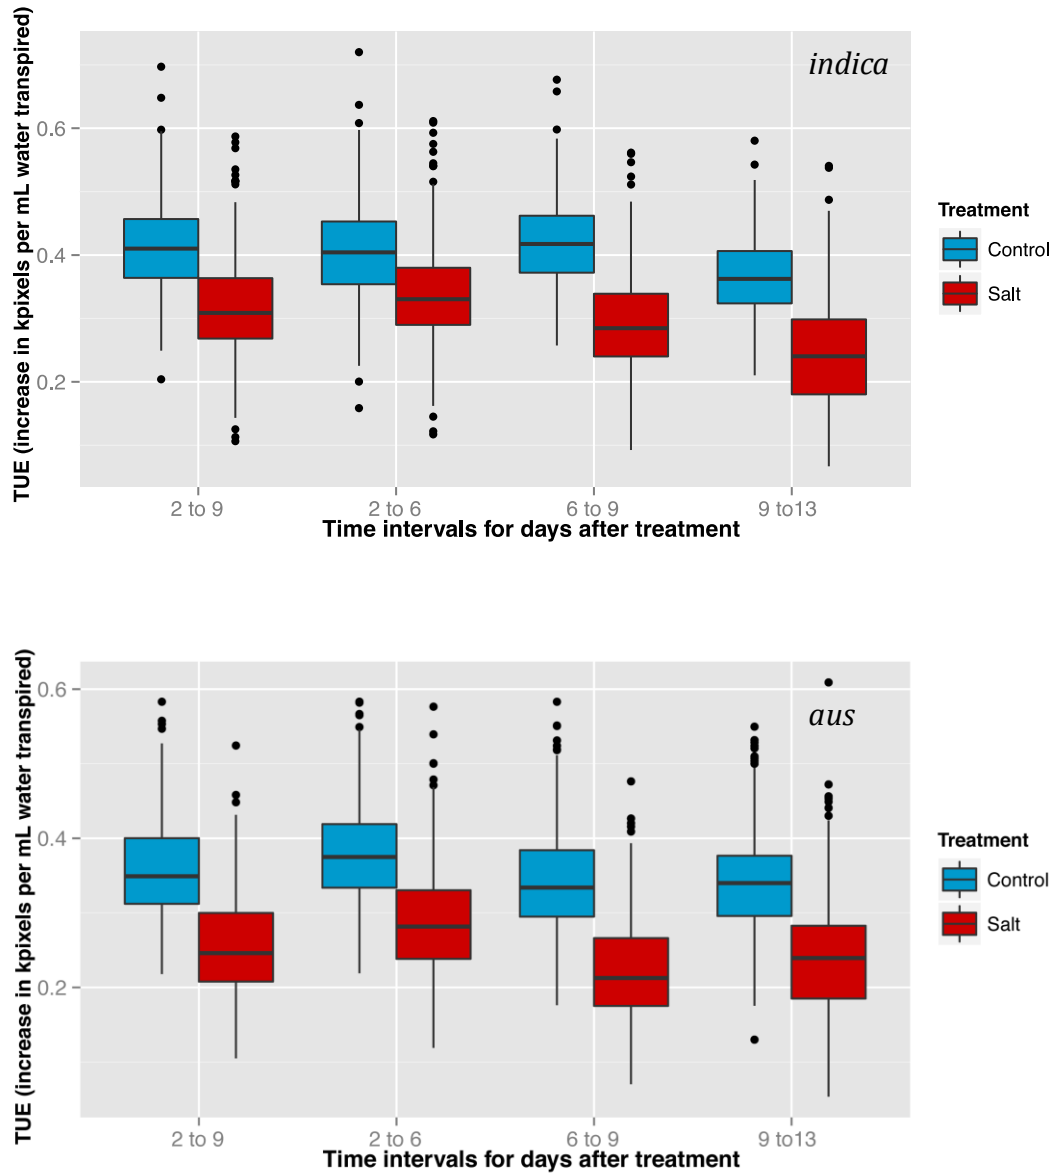

**Supplementary Figure 3: Boxplots comparing TR and TUE of plants grown in control and saline conditions.**

(a) Values of **transpiration rate** (TR) at different time intervals for *indica* (top) and *aus* (bottom).

(b) Values of **transpiration use efficiency** (TUE) at different time intervals for *indica* (top) and *aus* (bottom).

**a***indica*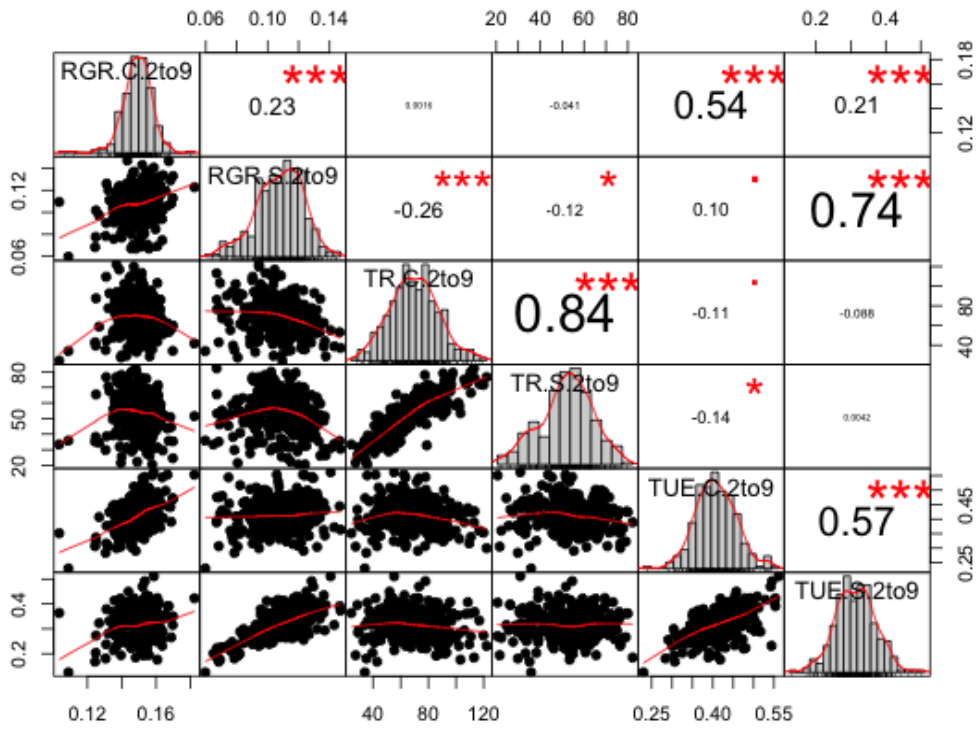**b***indica*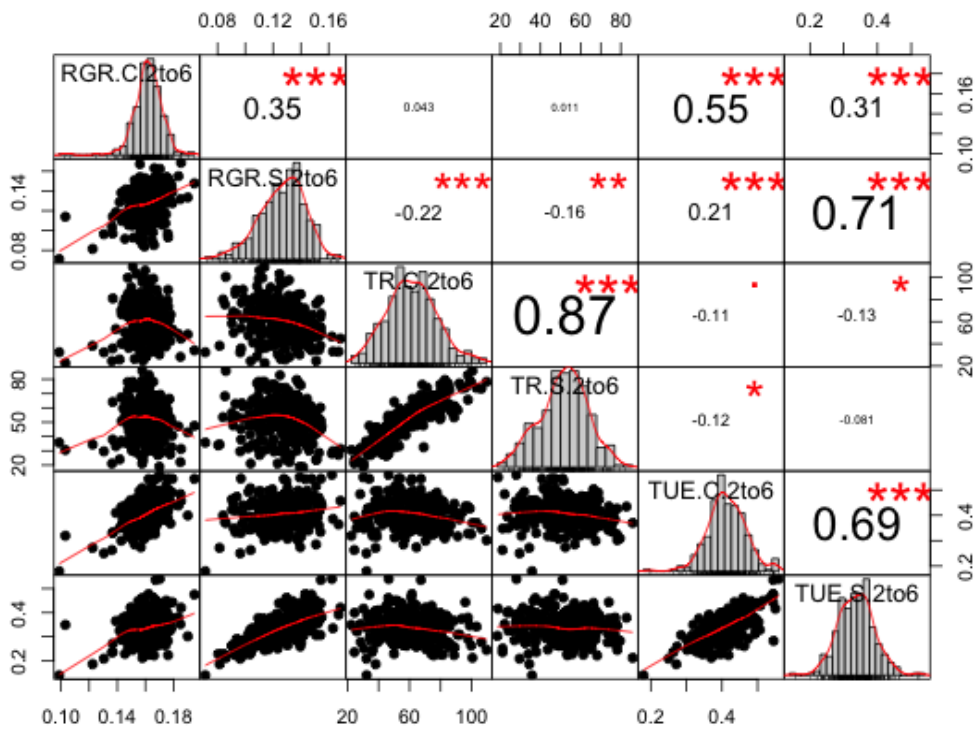



c

*indica*

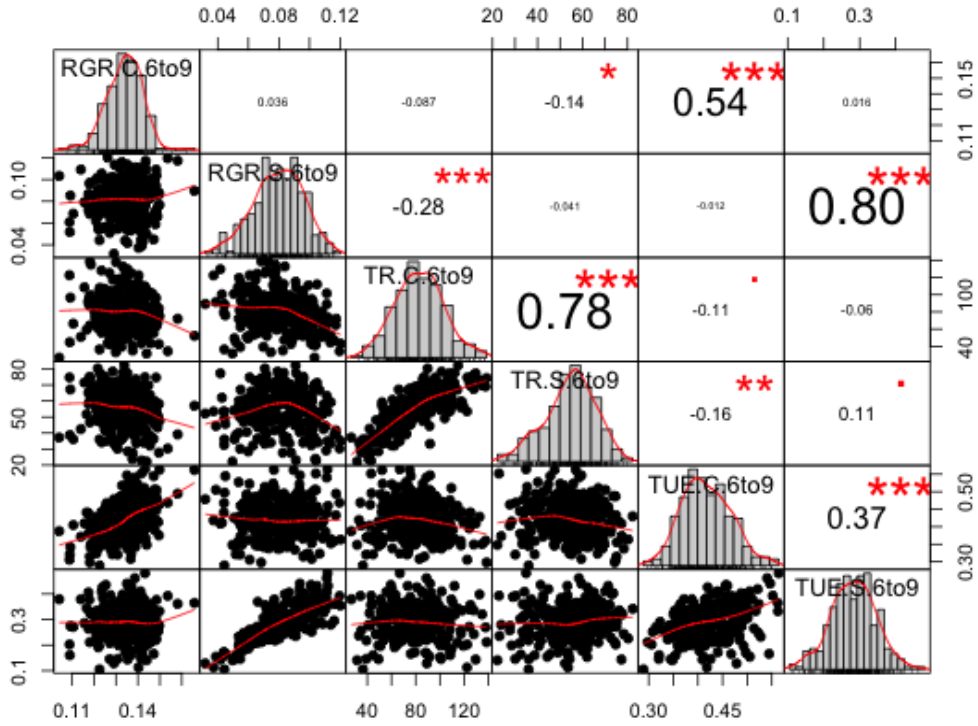

d

*indica*

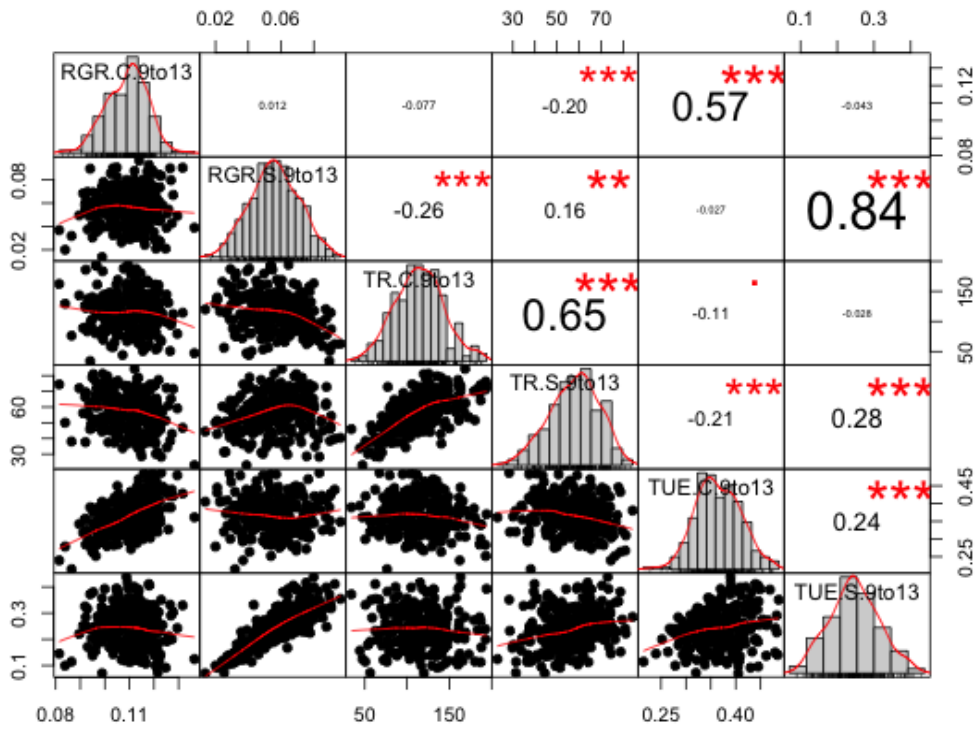

e

*aus*

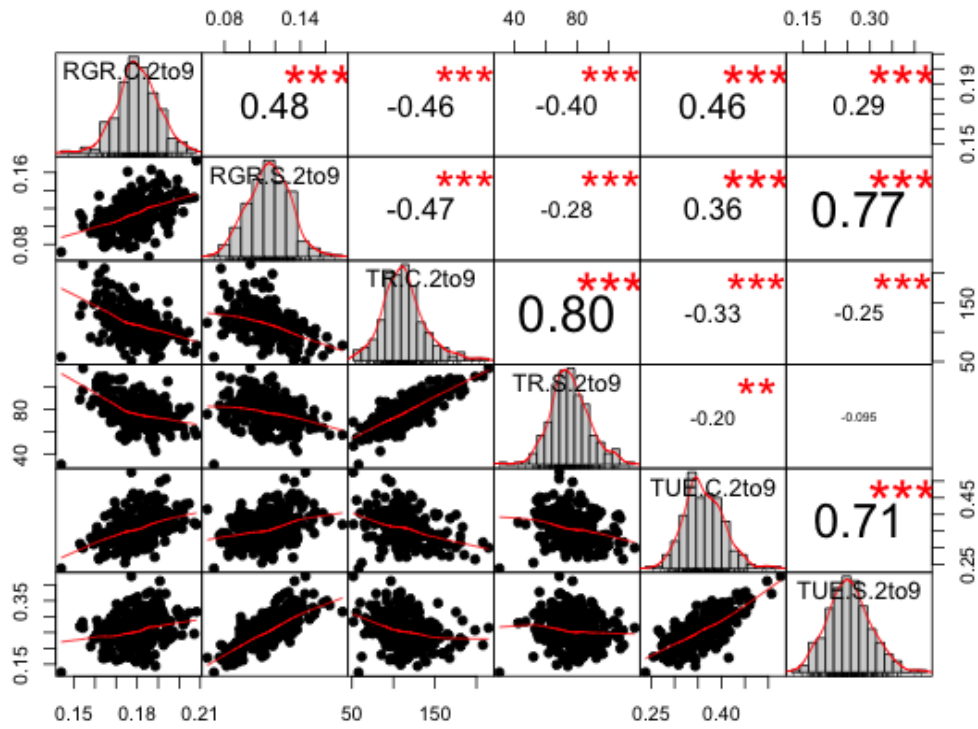

f

*aus*

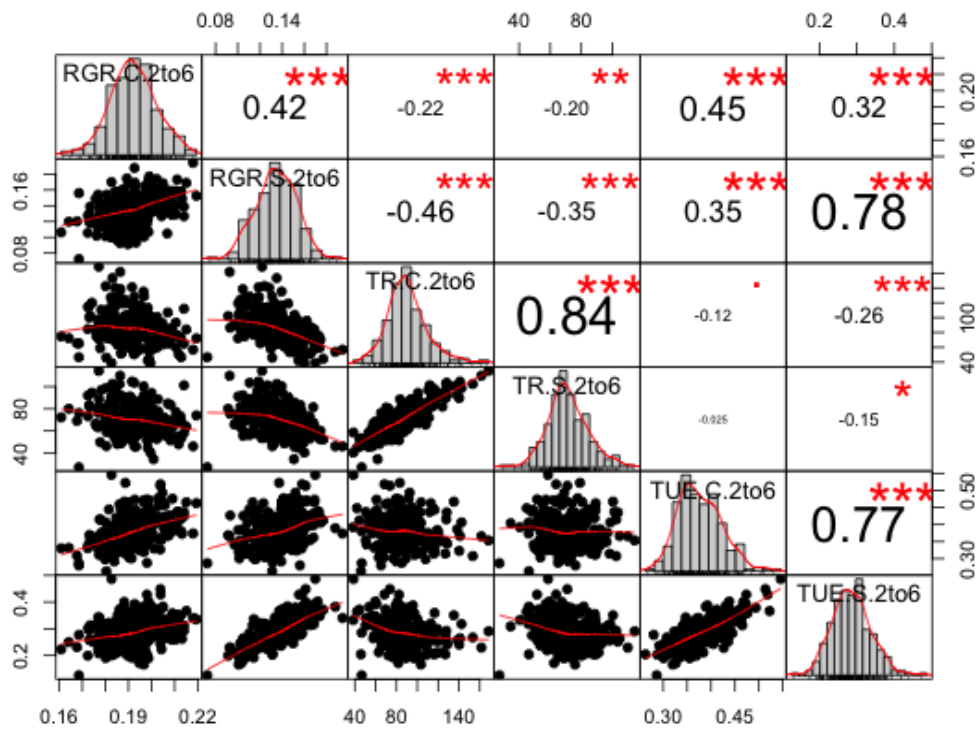

**g**

*aus*

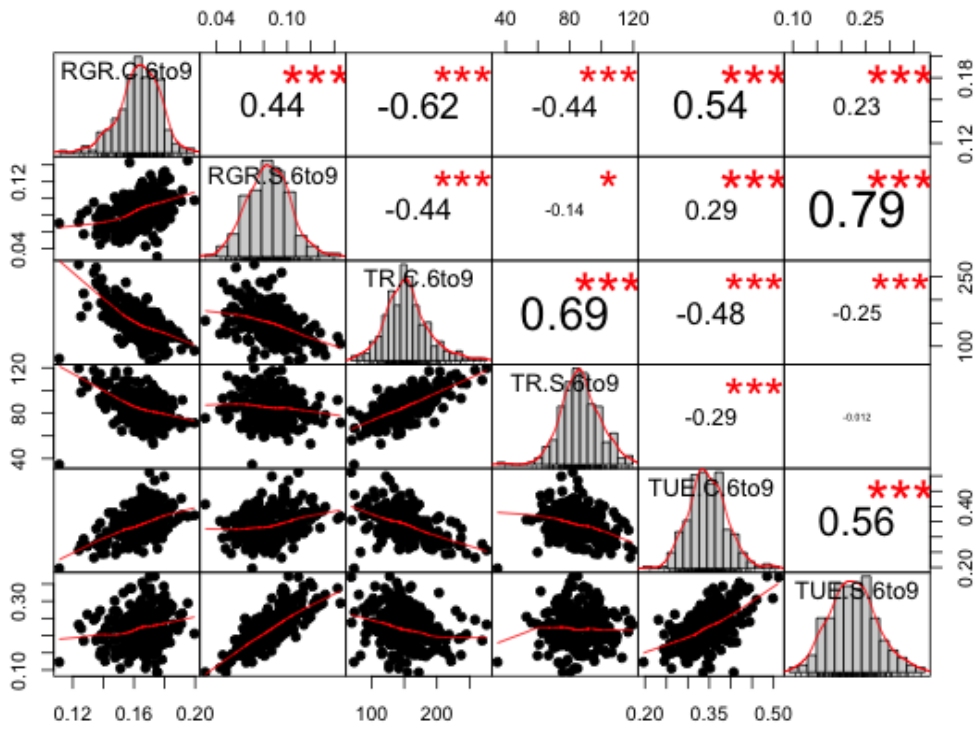

**h**

*aus*

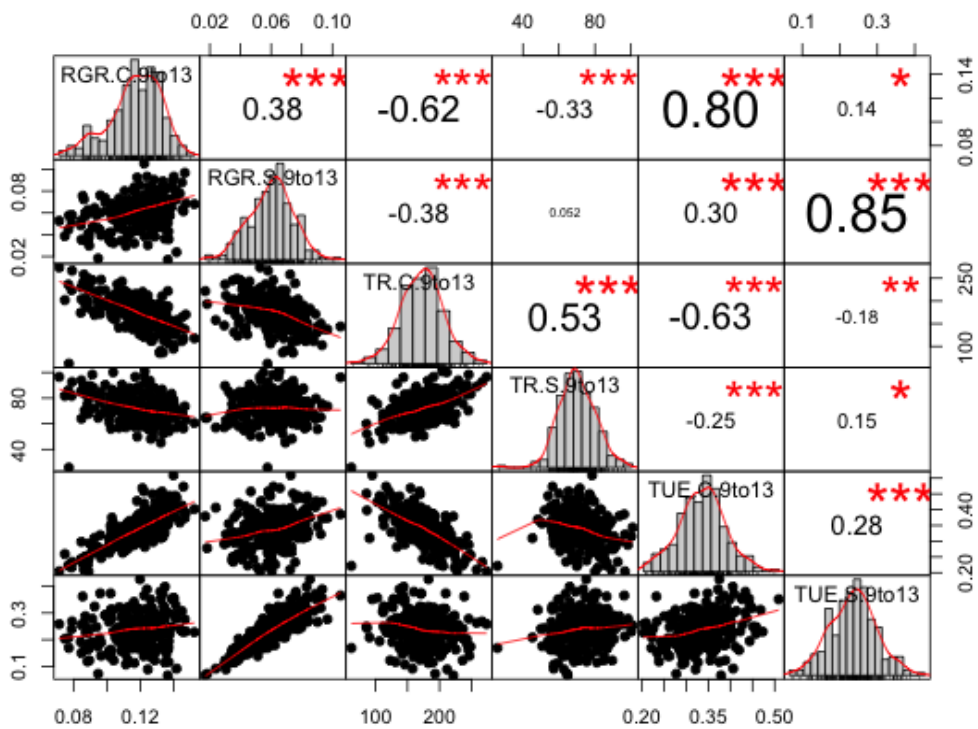

#### **Supplementary Figure 4: Correlation matrices for *indica* and *aus*.**

Pearson correlation analysis was conducted between the three main traits relative growth rate (RGR) (per day) transpiration rate (TR) (mL water transpired per plant per day) and transpiration use efficiency (TUE) (increase in kpixels per mL water transpired) at each time interval to assess the relationships between traits. The distribution of each variable is shown on the diagonal. The bottom half of the figure, below the diagonal, shows the bivariate scatter plots with a fitted line displayed. The top half of the figure, above the diagonal, displays the value of the correlation with the significance level shown with asterisks (\* $P < 0.05$ , \*\* $P < 0.01$ , \*\*\* $P < 0.001$ ).

a

Model 'Marker' for relative growth rate (RGR)

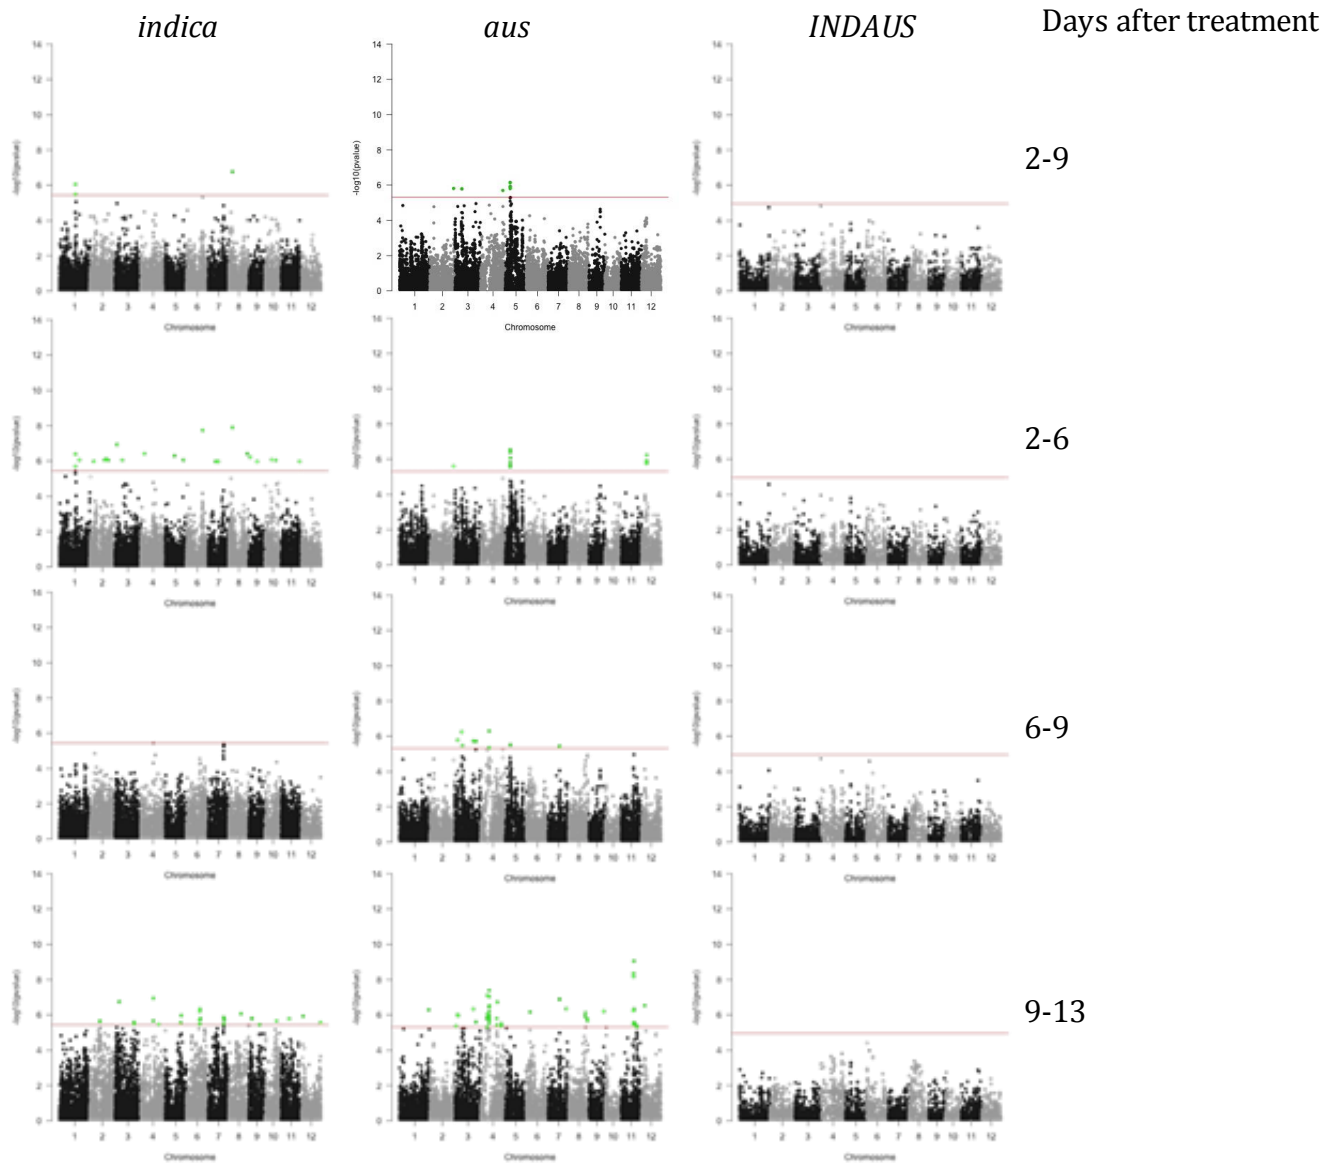



Model 'Marker' for transpiration use efficiency (TUE)

c

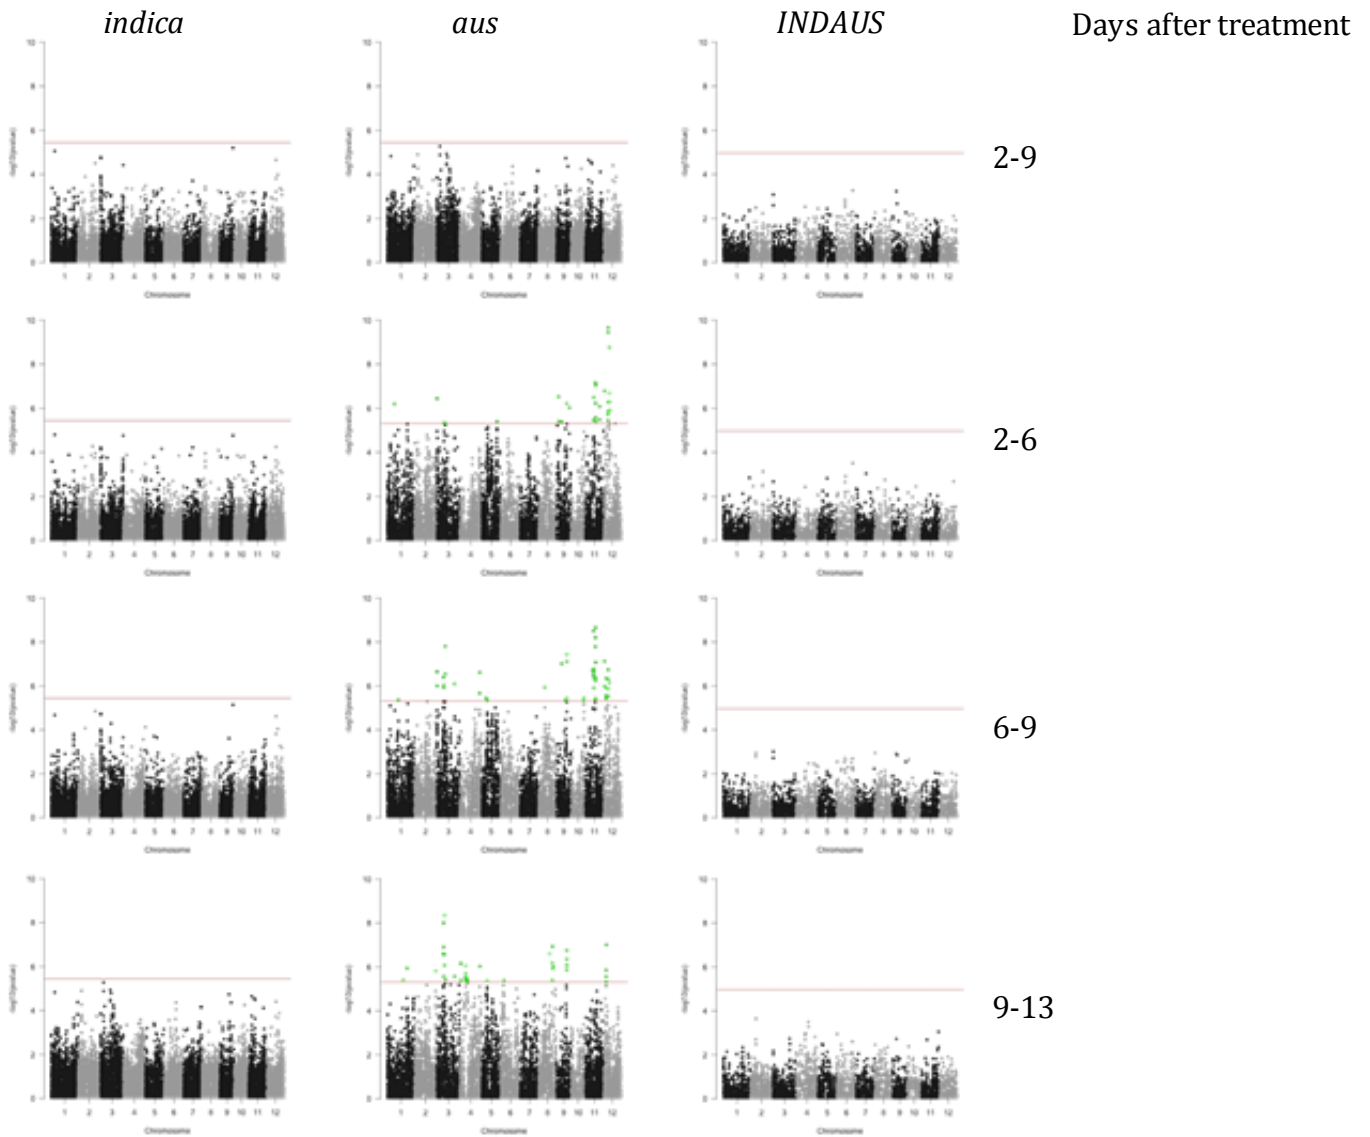



Model 'Marker-by-Treatment' for relative growth rate (RGR)

d

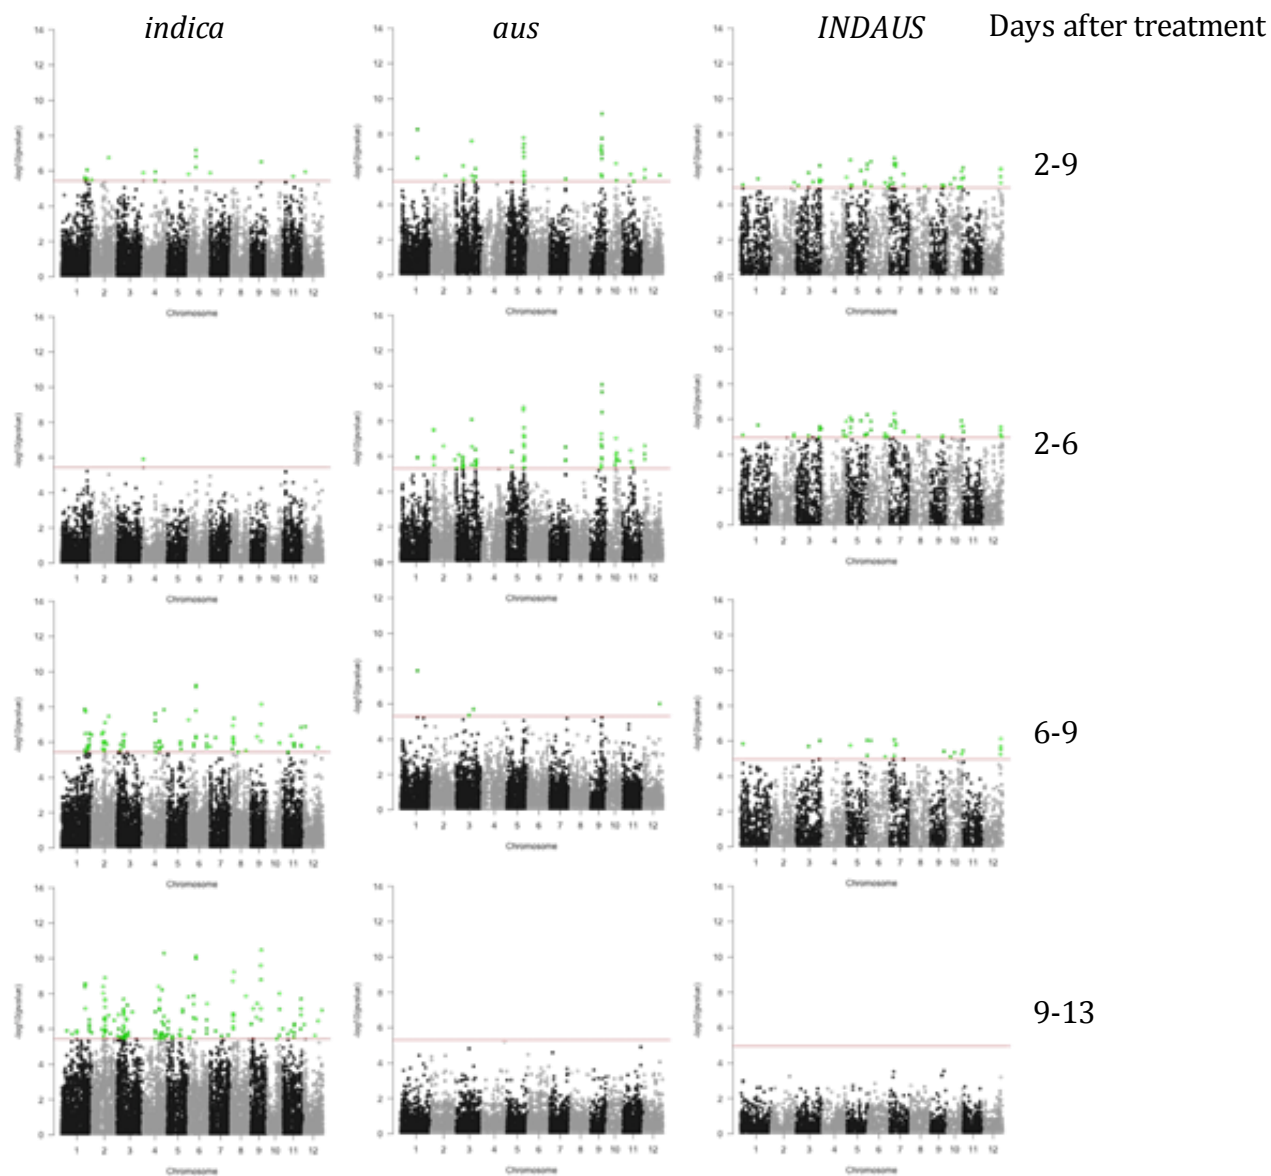



**f** Model 'Marker-by-Treatment' for transpiration use efficiency (TUE)

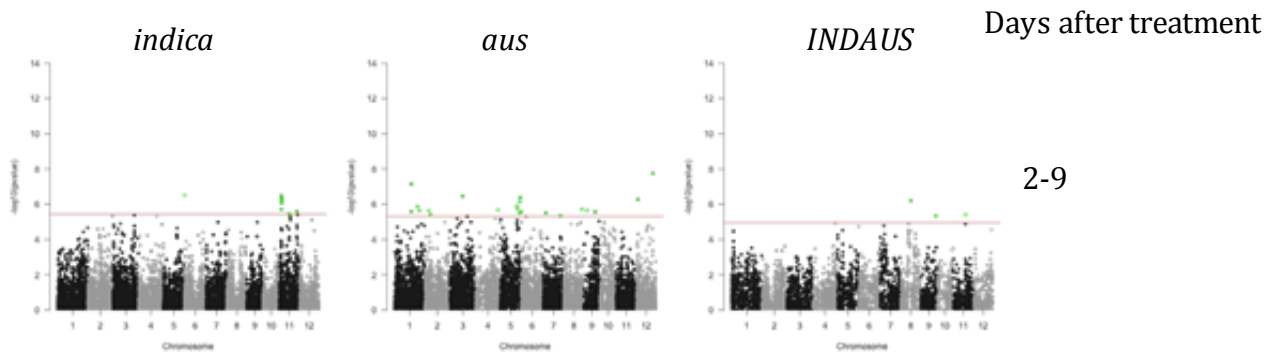

Remaining panels for other time intervals are included in the main body of the manuscript.

Mixed Linear Model for relative growth rate for stress tolerance index (RGR-STI)

g

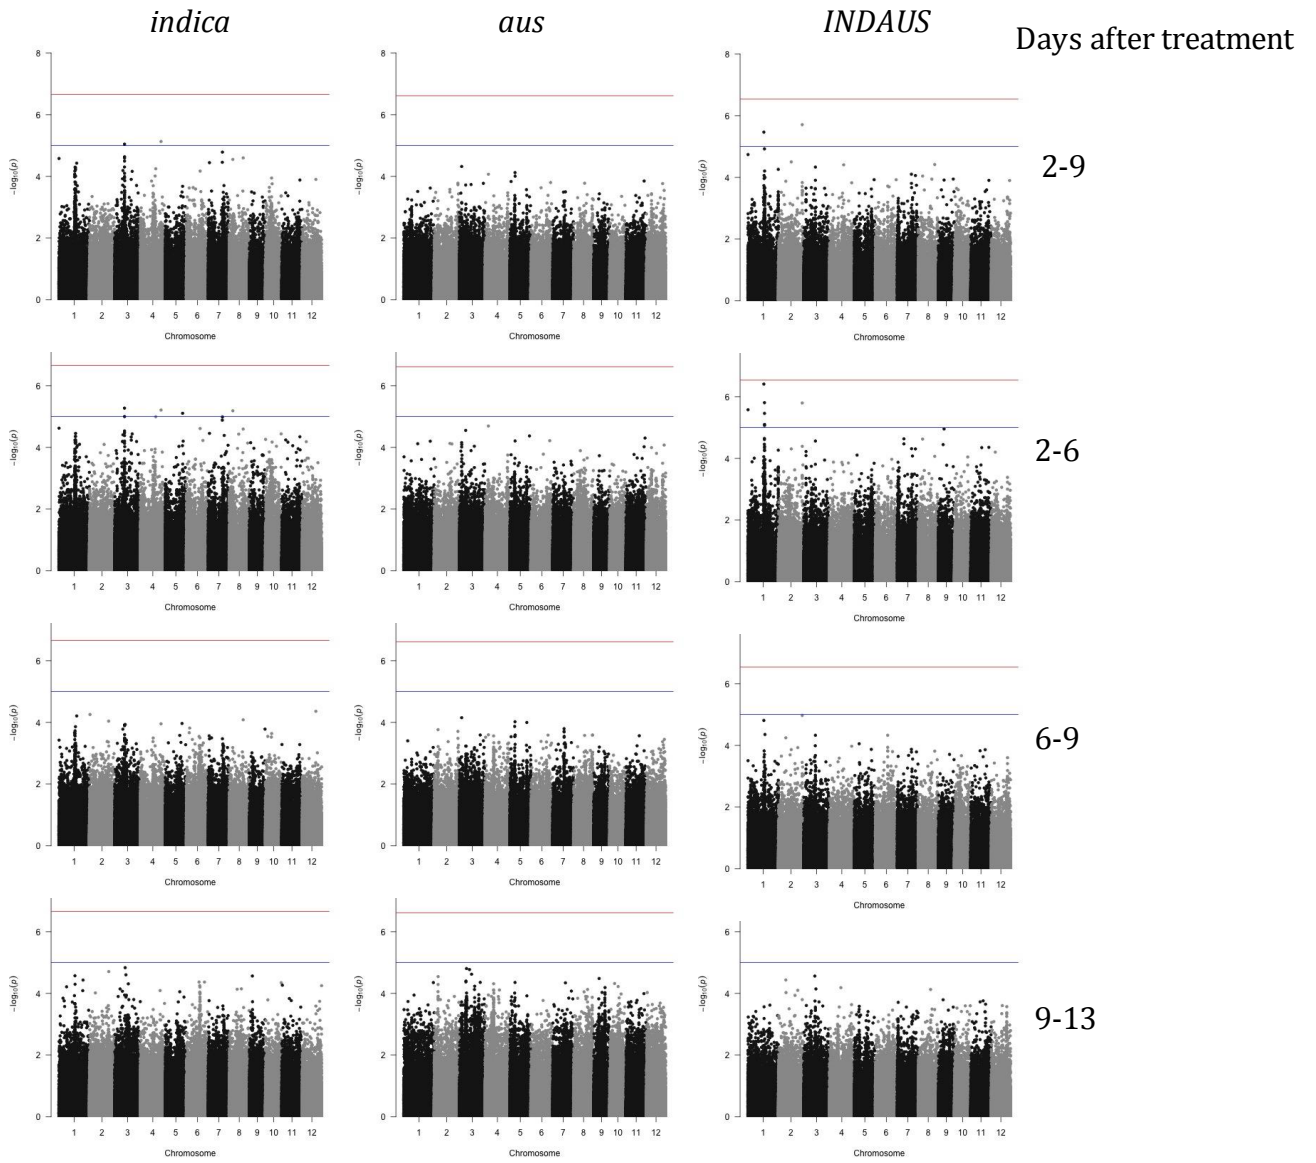





**Supplementary Figure 5: Manhattan plots of SNPs for association with the traits relative growth rate, transpiration rate and transpiration use efficiency using both models (conventional Mixed Linear Model (MLM) and our developed Interaction model) at the four different intervals.**

SNPs are highlighted in green if they reach genome wide significance for association with the trait at each time interval in *indica*, *aus* and *INDAUS* (panels left to right). SNPs associated with the trait are shown at the different time intervals: 2-9, 2-6, 6-9 and 9-13 days after treatment (panels top to bottom). **(a-c)** Manhattan plots using the GWAS interaction model ‘Marker’. Horizontal red lines indicate Bonferroni significance thresholds  $P < 2.6 \times 10^{-6}$ ,  $3.0 \times 10^{-6}$  and  $9.0 \times 10^{-6}$  for *indica*, *aus* and *INDAUS*, respectively. **(a)** SNPs associated with RGR, **(b)** TR and **(c)** TUE. **(d-f)** as in **(a-c)** with GWAS interaction model ‘Marker-by-Treatment’ and panels for TUE only for interval 2-9 DAST. **(g-i)** Manhattan plots using the GWAS MLM model in the software TASSEL. Horizontal red lines indicate Bonferroni significance thresholds  $P < 2.2 \times 10^{-7}$ ,  $\times 10^{-6}$  and  $2.9 \times 10^{-7}$  for *indica*, *aus* and *INDAUS*, respectively. While blue lines indicate the suggestive threshold  $P < 1 \times 10^{-5}$  **(g)** SNPs associated with relative growth rate of stress tolerance index (RGR-STI) index **(h)** with transpiration rate of stress-weighted performance (TR-SWP) **(i)** with transpiration use efficiency of tolerance index (TUE-TOL).





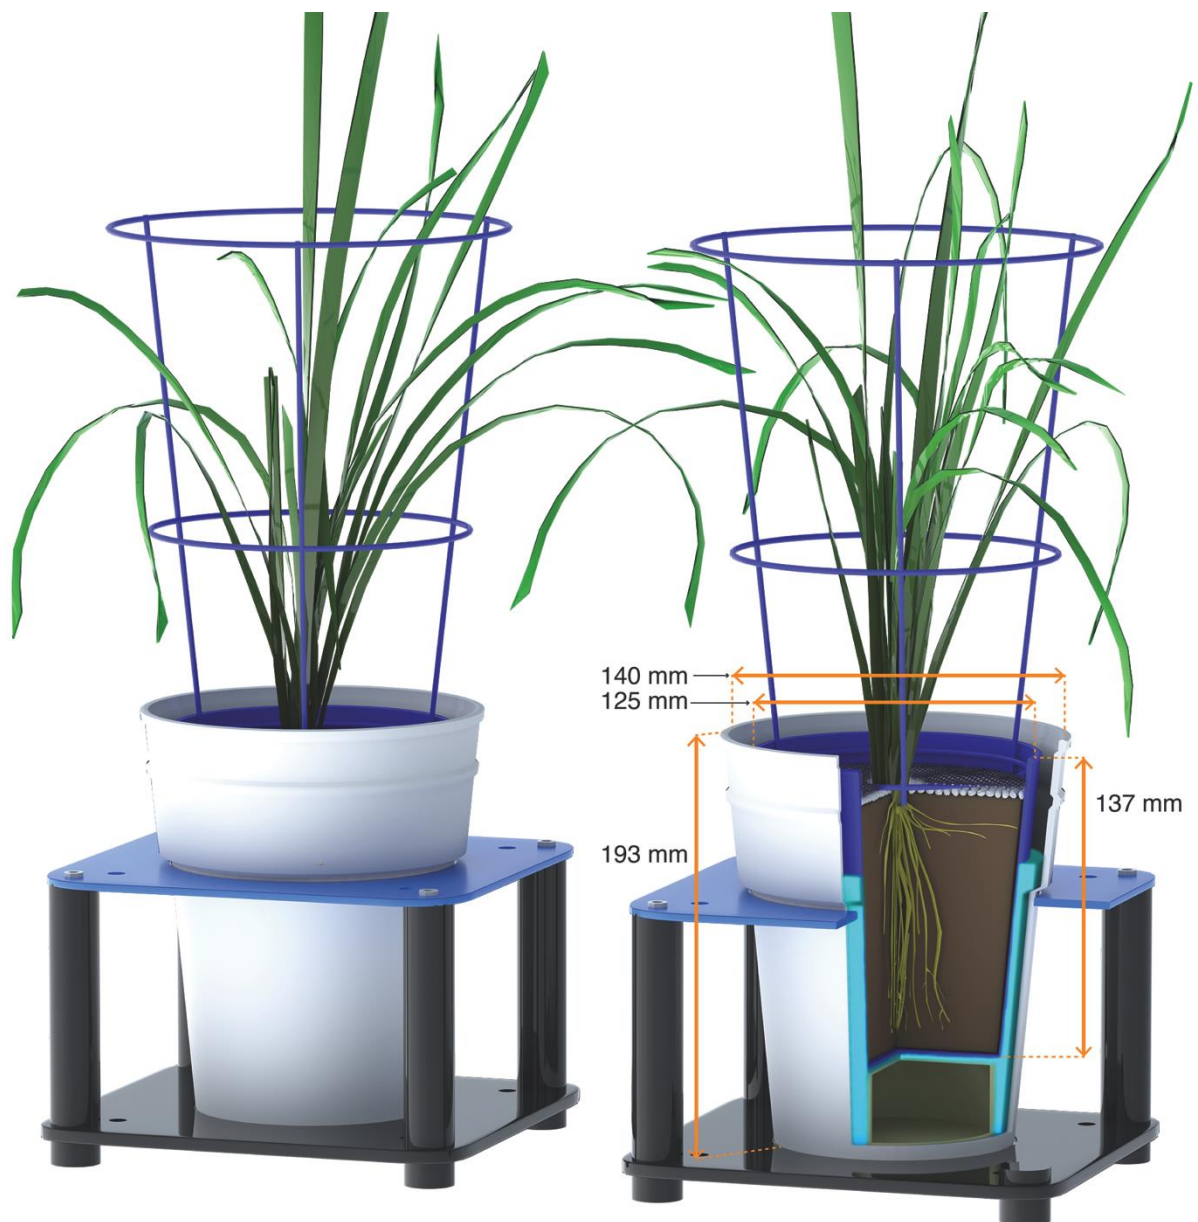

**Supplementary Figure 6: Double-pot design to enable growth of rice in controlled waterlogged conditions, to which salt could be applied.**

Dark blue pots (125 mm diameter, 137 mm height) with drainage holes were placed inside white closed base pots (140 mm diameter, 193 mm height). White pots had a sealed plastic container (93 mm diameter, 50 mm height) in the bottom to reduce the volume of water (light blue) required to flood the dark blue pot inside the white pot. The double-pot system was filled to a certain water level to create a waterlogged environment typical for rice growing conditions, while avoiding water spillage on the conveyor system. The soil surface was covered by 200 g of white gravel (approximately 2-5 mm particle size) to reduce development of algae and evaporation from the soil surface. Blue PVC mats were placed on top of the gravel to further

reduce evaporation. A blue frame was placed on top of pots in a fixed position to support the plant for easier image analysis.

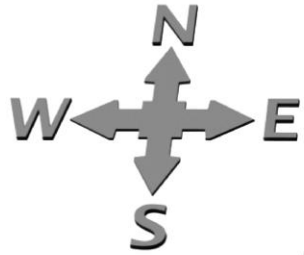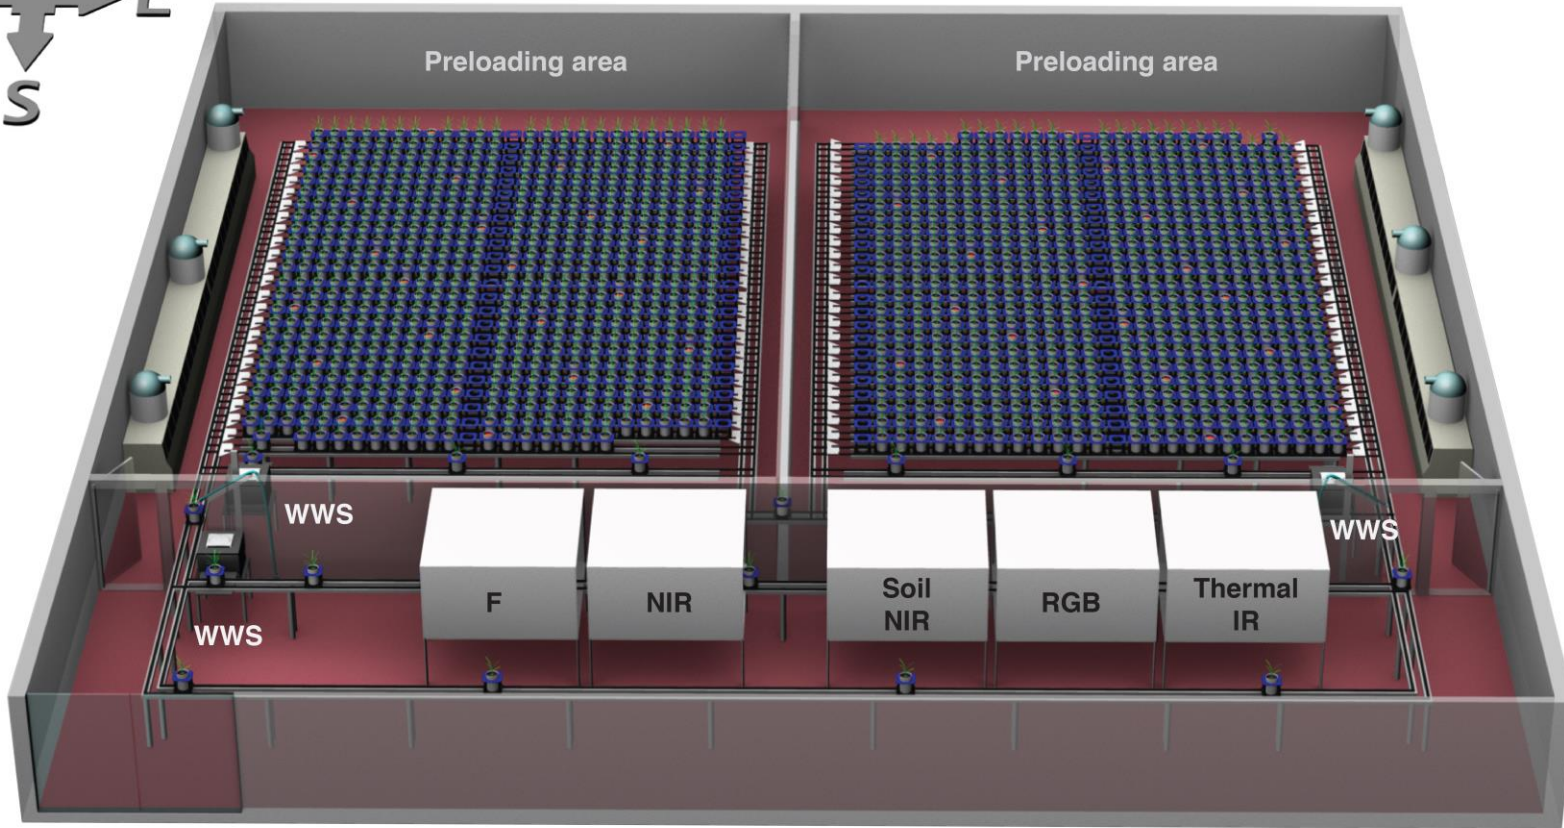

**Supplementary Figure 7: Illustration of the two quarantine-approved Smarthouses at The Plant Accelerator<sup>®</sup>** (Australian Plant Phenomics Facility, University of Adelaide, Adelaide, Australia; -34.97113, 138.63989).

Two Smarthouses, north-east (NE) and north-west (NW), fitted with conveyor systems are connected to one imaging hall with five camera stations (LemnaTec Scanalyzer 3D) for the daily non-destructive phenotyping of plants. The imaging stations are arranged in a 2 + 3 format from west to east, providing fluorescence imaging, near-infrared imaging, near-infrared imaging of pots (soil), red-green-blue visible imaging and far infrared (thermal) imaging. Each Smarthouse has a capacity of up to 624 carts. Two columns remained unused due to weight restrictions on the conveyor system. The carts marked in red (12 out of the 528 carts) represent the evaporation pots (pots without a plant). Air conditioners are on opposite sides of each Smarthouse and humidifiers are placed on top of the air conditioning units solely for this experiment. There are three watering and weighing stations (WWS). Each plant/carrier is delivered automatically on the conveyor system to the WWS and is controlled by high capacity computing equipment. The preloading area is where the plants are grown on benches before they are manually loaded onto the conveyor system. It should also be noted that there is early morning shading on the eastern side of the NE Smarthouse from adjacent trees and hillside. This shading is likely to be a cause of some spatial variation.

a

*indica*

NE Smarthouse Positions

|       |    |      |      |     |      |     |      |     |      |     |      |     |      |      |      |     |      |     |      |     |      |     |      |     |      |      |      |
|-------|----|------|------|-----|------|-----|------|-----|------|-----|------|-----|------|------|------|-----|------|-----|------|-----|------|-----|------|-----|------|------|------|
|       | 1  | 2    | 3    | 4   | 5    | 6   | 7    | 8   | 9    | 10  | 11   | 12  | 13   | 14   | 15   | 16  | 17   | 18  | 19   | 20  | 21   | 22  | 23   | 24  | 25   | 26   |      |
| Lanes | 1  | Void | 177  | 177 | 219  | 219 | 191  | 191 | Evap | 166 | 166  | 52  | 52   | Void | 273  | 273 | 100  | 100 | 1    | 1   | 251  | 251 | 35   | 35  | 278  | 278  | Void |
|       | 2  | 295  | 295  | 69  | 69   | 107 | 107  | 293 | 293  | 13  | 13   | 249 | 249  | Void | 41   | 41  | 247  | 247 | 81   | 81  | Evap | 16  | 16   | 142 | 142  | Void | Void |
|       | 3  | Void | Evap | 206 | 206  | 272 | 272  | 106 | 106  | 157 | 157  | 158 | 158  | Void | 65   | 65  | 104  | 104 | 66   | 66  | 241  | 241 | 11   | 11  | 211  | 211  | Void |
|       | 4  | 95   | 95   | 282 | 282  | 300 | 300  | 161 | 161  | 179 | 179  | 240 | 240  | Void | 253  | 253 | Evap | 196 | 196  | 194 | 194  | 265 | 265  | 204 | 204  | Void | Void |
|       | 5  | Void | 19   | 19  | 213  | 213 | 39   | 39  | 14   | 14  | Evap | 172 | 172  | Void | 115  | 115 | 243  | 243 | 21   | 21  | 28   | 28  | 98   | 98  | 44   | 44   | Void |
|       | 6  | 146  | 146  | 88  | 88   | 242 | 242  | 62  | 62   | 4   | 4    | 254 | 254  | Void | 87   | 87  | 131  | 131 | 130  | 130 | 234  | 234 | 61   | 61  | Evap | Void | Void |
|       | 7  | Void | 252  | 252 | Evap | 114 | 114  | 71  | 71   | 112 | 112  | 276 | 276  | Void | 3    | 3   | 245  | 245 | 24   | 24  | 53   | 53  | 136  | 136 | 50   | 50   | Void |
|       | 8  | 122  | 122  | 289 | 289  | 55  | 55   | 258 | 258  | 250 | 250  | 129 | 129  | Void | 76   | 76  | 111  | 111 | Evap | 6   | 6    | 173 | 173  | 58  | 58   | Void | Void |
|       | 9  | Void | 240  | 240 | 2    | 2   | 33   | 33  | 193  | 193 | 150  | 150 | Evap | Void | 117  | 117 | 22   | 22  | 269  | 269 | 89   | 89  | 67   | 67  | 242  | 242  | Void |
|       | 10 | 140  | 140  | 158 | 158  | 111 | 111  | 298 | 298  | 85  | 85   | 163 | 163  | Void | 287  | 287 | 295  | 295 | 271  | 271 | 215  | 215 | Evap | 209 | 209  | Void | Void |
|       | 11 | Void | 203  | 203 | 216  | 216 | Evap | 28  | 28   | 221 | 221  | 50  | 50   | Void | 127  | 127 | 201  | 201 | 212  | 212 | 31   | 31  | 4    | 4   | 293  | 293  | Void |
|       | 12 | 54   | 54   | 151 | 151  | 169 | 169  | 202 | 202  | 35  | 35   | 266 | 266  | Void | Evap | 230 | 230  | 94  | 94   | 283 | 283  | 37  | 37   | 99  | 99   | Void | Void |
|       | 13 | Void | 254  | 254 | 270  | 270 | 149  | 149 | Evap | 68  | 68   | 188 | 188  | Void | 57   | 57  | 206  | 206 | 281  | 281 | 123  | 123 | 284  | 284 | 275  | 275  | Void |
|       | 14 | 292  | 292  | 214 | 214  | 187 | 187  | 170 | 170  | 102 | 102  | 161 | 161  | Void | 171  | 171 | 92   | 92  | 125  | 125 | Evap | 172 | 172  | 132 | 132  | Void | Void |
|       | 15 | Void | Evap | 119 | 119  | 291 | 291  | 56  | 56   | 256 | 256  | 101 | 101  | Void | 252  | 252 | 38   | 38  | 194  | 194 | 40   | 40  | 176  | 176 | 120  | 120  | Void |
|       | 16 | 247  | 247  | 77  | 77   | 43  | 43   | 168 | 168  | 173 | 173  | 231 | 231  | Void | 233  | 233 | Evap | 220 | 220  | 10  | 10   | 267 | 267  | 34  | 34   | Void | Void |
|       | 17 | Void | 138  | 138 | 141  | 141 | 294  | 294 | 239  | 239 | Evap | 73  | 73   | Void | 103  | 103 | 91   | 91  | 9    | 9   | 285  | 285 | 156  | 156 | 152  | 152  | Void |
|       | 18 | 80   | 80   | 26  | 26   | 180 | 180  | 6   | 6    | 83  | 83   | 226 | 226  | Void | 246  | 246 | 280  | 280 | 237  | 237 | 131  | 131 | 118  | 118 | Evap | Void | Void |
|       | 19 | Void | 179  | 179 | Evap | 249 | 249  | 186 | 186  | 134 | 134  | 84  | 84   | Void | 165  | 165 | 113  | 113 | 45   | 45  | 133  | 133 | 189  | 189 | 86   | 86   | Void |
|       | 20 | 16   | 16   | 97  | 97   | 74  | 74   | 238 | 238  | 296 | 296  | 116 | 116  | Void | 264  | 264 | 130  | 130 | Evap | 115 | 115  | 255 | 255  | 196 | 196  | Void | Void |
|       | 21 | Void | 17   | 17  | 279  | 279 | 75   | 75  | 183  | 183 | 135  | 135 | Evap | Void | 109  | 109 | 205  | 205 | 143  | 143 | 277  | 277 | 122  | 122 | 272  | 272  | Void |
|       | 22 | 29   | 29   | 244 | 244  | 288 | 288  | 41  | 41   | 229 | 229  | 268 | 268  | Void | 5    | 5   | 181  | 181 | 105  | 105 | 8    | 8   | Evap | 258 | 258  | Void | Void |
|       | 23 | Void | 108  | 108 | 12   | 12  | Evap | 204 | 204  | 251 | 251  | 147 | 147  | Void | 20   | 20  | 262  | 262 | 148  | 148 | 289  | 289 | 259  | 259 | 48   | 48   | Void |
|       | 24 | 96   | 96   | 25  | 25   | 182 | 182  | 299 | 299  | 55  | 55   | 166 | 166  | Void | Evap | 36  | 36   | 274 | 274  | 290 | 290  | 30  | 30   | 121 | 121  | Void | Void |

b

*indica*

NE Smarthouse Positions

|       |    |      |      |   |      |   |      |   |      |    |      |      |      |      |      |    |      |    |      |    |      |    |      |    |      |      |      |
|-------|----|------|------|---|------|---|------|---|------|----|------|------|------|------|------|----|------|----|------|----|------|----|------|----|------|------|------|
|       | 1  | 2    | 3    | 4 | 5    | 6 | 7    | 8 | 9    | 10 | 11   | 12   | 13   | 14   | 15   | 16 | 17   | 18 | 19   | 20 | 21   | 22 | 23   | 24 | 25   | 26   |      |
| Lanes | 1  | Void | 1    | 2 | 1    | 2 | 2    | 1 | Evap | 2  | 1    | 2    | 1    | Void | 2    | 1  | 1    | 2  | 1    | 2  | 2    | 1  | 1    | 2  | 2    | 1    | Void |
|       | 2  | 2    | 1    | 2 | 1    | 1 | 2    | 1 | 2    | 1  | 2    | 1    | 2    | Void | 1    | 2  | 2    | 1  | 2    | 1  | Evap | 2  | 1    | 1  | 2    | Void | Void |
|       | 3  | Void | Evap | 1 | 2    | 1 | 2    | 1 | 2    | 1  | 2    | 2    | 1    | Void | 1    | 2  | 2    | 1  | 1    | 2  | 2    | 1  | 1    | 2  | 2    | 1    | Void |
|       | 4  | 2    | 1    | 1 | 2    | 1 | 2    | 2 | 1    | 1  | 2    | 2    | 1    | Void | 2    | 1  | Evap | 1  | 2    | 1  | 2    | 2  | 1    | 1  | 2    | Void | Void |
|       | 5  | Void | 1    | 2 | 1    | 2 | 2    | 1 | 2    | 1  | Evap | 1    | 2    | Void | 1    | 2  | 2    | 1  | 2    | 1  | 2    | 1  | 2    | 1  | 2    | 1    | Void |
|       | 6  | 2    | 1    | 2 | 1    | 1 | 2    | 2 | 1    | 1  | 2    | 2    | 1    | Void | 2    | 1  | 2    | 1  | 2    | 1  | 2    | 1  | 2    | 1  | 2    | 1    | Void |
|       | 7  | Void | 2    | 1 | Evap | 1 | 2    | 1 | 2    | 1  | 2    | 2    | 1    | Void | 1    | 2  | 1    | 2  | 1    | 2  | 2    | 1  | 1    | 2  | 1    | 2    | Void |
|       | 8  | 2    | 1    | 1 | 2    | 1 | 2    | 2 | 1    | 2  | 1    | 2    | 1    | Void | 2    | 1  | 1    | 2  | Evap | 1  | 2    | 1  | 2    | 2  | 1    | Void | Void |
|       | 9  | Void | 2    | 1 | 1    | 2 | 2    | 1 | 2    | 1  | 1    | 2    | Evap | Void | 2    | 1  | 2    | 1  | 1    | 2  | 2    | 1  | 1    | 2  | 1    | 2    | Void |
|       | 10 | 2    | 1    | 2 | 1    | 2 | 1    | 2 | 1    | 1  | 2    | 2    | 1    | Void | 2    | 1  | 1    | 2  | 2    | 1  | 1    | 2  | Evap | 1  | 2    | Void | Void |
|       | 11 | Void | 2    | 1 | 1    | 2 | Evap | 2 | 1    | 2  | 1    | 1    | 2    | Void | 2    | 1  | 2    | 1  | 1    | 2  | 1    | 2  | 1    | 2  | 2    | 1    | Void |
|       | 12 | 2    | 1    | 2 | 1    | 1 | 2    | 1 | 2    | 1  | 2    | 2    | 1    | Void | Evap | 1  | 2    | 2  | 1    | 1  | 2    | 1  | 2    | 1  | 2    | 1    | Void |
|       | 13 | Void | 1    | 2 | 2    | 1 | 2    | 1 | Evap | 2  | 1    | 1    | 2    | Void | 2    | 1  | 2    | 1  | 1    | 2  | 1    | 2  | 1    | 2  | 2    | 1    | Void |
|       | 14 | 1    | 2    | 1 | 2    | 1 | 2    | 1 | 2    | 1  | 2    | 2    | 1    | Void | 2    | 1  | 2    | 1  | 2    | 1  | Evap | 2  | 1    | 2  | 1    | Void | Void |
|       | 15 | Void | Evap | 1 | 2    | 2 | 1    | 2 | 1    | 1  | 2    | 1    | 2    | Void | 1    | 2  | 1    | 2  | 2    | 1  | 1    | 2  | 2    | 1  | 1    | 2    | Void |
|       | 16 | 1    | 2    | 1 | 2    | 2 | 1    | 1 | 2    | 2  | 1    | 2    | 1    | Void | 1    | 2  | Evap | 2  | 1    | 2  | 1    | 2  | 1    | 2  | 1    | 2    | Void |
|       | 17 | Void | 2    | 1 | 2    | 2 | 1    | 1 | 2    | 1  | 2    | Evap | 1    | 2    | Void | 2  | 1    | 1  | 2    | 2  | 1    | 2  | 1    | 2  | 1    | 2    | Void |
|       | 18 | 2    | 1    | 1 | 2    | 1 | 2    | 2 | 1    | 1  | 2    | 2    | 1    | Void | 1    | 2  | 1    | 2  | 1    | 2  | 2    | 1  | 1    | 2  | Evap | Void | Void |
|       | 19 | Void | 1    | 2 | Evap | 2 | 1    | 2 | 1    | 2  | 1    | 2    | 1    | Void | 1    | 2  | 1    | 2  | 2    | 1  | 2    | 1  | 2    | 1  | 2    | 1    | Void |
|       | 20 | 1    | 2    | 1 | 2    | 1 | 2    | 1 | 2    | 1  | 2    | 2    | 1    | Void | 2    | 1  | 1    | 2  | Evap | 2  | 1    | 2  | 1    | 1  | 2    | Void | Void |
|       | 21 | Void | 2    | 1 | 2    | 1 | 1    | 2 | 1    | 2  | 1    | 2    | Evap | Void | 2    | 1  | 1    | 2  | 1    | 2  | 2    | 1  | 1    | 2  | 1    | 2    | Void |
|       | 22 | 2    | 1    | 1 | 2    | 1 | 2    | 1 | 2    | 1  | 2    | 2    | 1    | Void | 2    | 1  | 2    | 1  | 1    | 2  | 2    | 1  | Evap | 1  | 2    | Void | Void |
|       | 23 | Void | 2    | 1 | 1    | 2 | Evap | 1 | 2    | 1  | 2    | 1    | 2    | Void | 1    | 2  | 2    | 1  | 1    | 2  | 1    | 2  | 1    | 2  | 2    | 1    | Void |
|       | 24 | 1    | 2    | 2 | 1    | 1 | 2    | 2 | 1    | 2  | 1    | 1    | 2    | Void | Evap | 2  | 1    | 1  | 2    | 1  | 2    | 2  | 1    | 1  | 2    | Void | Void |



c

*indica*

NW Smarthouse Positions

|       |    |      |      |      |     |      |     |      |     |      |     |      |     |      |      |      |      |      |     |      |     |      |     |      |     |      |      |     |     |
|-------|----|------|------|------|-----|------|-----|------|-----|------|-----|------|-----|------|------|------|------|------|-----|------|-----|------|-----|------|-----|------|------|-----|-----|
|       |    | 26   | 25   | 24   | 23  | 22   | 21  | 20   | 19  | 18   | 17  | 16   | 15  | 14   | 13   | 12   | 11   | 10   | 9   | 8    | 7   | 6    | 5   | 4    | 3   | 2    | 1    |     |     |
| Lanes | 1  | Void | 280  | 280  | 243 | 243  | 200 | 200  | 190 | 190  | 203 | 203  | 178 | 178  | Void | 277  | 277  | 156  | 156 | Evap | 72  | 72   | 46  | 46   | 48  | 48   | Void |     |     |
|       | 2  | Void | Void | 183  | 183 | 2    | 2   | Evap | 187 | 187  | 241 | 241  | 59  | 59   | Void | 228  | 228  | 234  | 234 | 18   | 18  | 276  | 276 | 181  | 181 | 261  | 261  |     |     |
|       | 3  | Void | 26   | 26   | 104 | 104  | 177 | 177  | 120 | 120  | 68  | 68   | 271 | 271  | Void | 124  | 124  | 267  | 267 | 91   | 91  | 21   | 21  | 89   | 89  | Evap | Void |     |     |
|       | 4  | Void | Void | 71   | 71  | 51   | 51  | 69   | 69  | 214  | 214 | Evap | 207 | 207  | Void | 49   | 49   | 236  | 236 | 208  | 208 | 66   | 66  | 246  | 246 | 144  | 144  |     |     |
|       | 5  | Void | 232  | 232  | 222 | 222  | 163 | 163  | 134 | 134  | 284 | 284  | 170 | 170  | Void | 216  | 216  | Evap | 52  | 52   | 167 | 167  | 38  | 38   | 223 | 223  | Void |     |     |
|       | 6  | Void | Void | Evap | 146 | 146  | 3   | 3    | 102 | 102  | 58  | 58   | 182 | 182  | Void | 81   | 81   | 106  | 106 | 154  | 154 | 70   | 70  | 15   | 15  | 37   | 37   |     |     |
|       | 7  | Void | 5    | 5    | 159 | 159  | 110 | 110  | 239 | 239  | 279 | 279  | 39  | 39   | Void | 257  | 257  | 94   | 94  | 275  | 275 | 235  | 235 | Evap | 136 | 136  | Void |     |     |
|       | 8  | Void | Void | 79   | 79  | 148  | 148 | 97   | 97  | Evap | 105 | 105  | 218 | 218  | Void | 180  | 180  | 227  | 227 | 64   | 64  | 67   | 67  | 86   | 86  | 11   | 11   |     |     |
|       | 9  | Void | 160  | 160  | 225 | 225  | 62  | 62   | 213 | 213  | 142 | 142  | 248 | 248  | Void | Evap | 40   | 40   | 152 | 152  | 198 | 198  | 250 | 250  | 1   | 1    | Void |     |     |
|       | 10 | Void | Void | 168  | 168 | Evap | 85  | 85   | 75  | 75   | 164 | 164  | 121 | 121  | Void | 176  | 176  | 195  | 195 | 260  | 260 | 268  | 268 | 264  | 264 | 139  | 139  |     |     |
|       | 11 | Void | 25   | 25   | 286 | 286  | 22  | 22   | 23  | 23   | 145 | 145  | 31  | 31   | Void | 98   | 98   | 90   | 90  | 211  | 211 | Evap | 9   | 9    | 101 | 101  | Void |     |     |
|       | 12 | Void | Void | 273  | 273 | 300  | 300 | 230  | 230 | 42   | 42  | 53   | 53  | Evap | Void | 210  | 210  | 118  | 118 | 263  | 263 | 73   | 73  | 93   | 93  | 233  | 233  |     |     |
|       | 13 | Void | 60   | 60   | 294 | 294  | 192 | 192  | 162 | 162  | 298 | 298  | 288 | 288  | Void | 132  | 132  | 265  | 265 | Evap | 237 | 237  | 224 | 224  | 245 | 245  | Void |     |     |
|       | 14 | Void | Void | 270  | 270 | 226  | 226 | Evap | 24  | 24   | 278 | 278  | 14  | 14   | Void | 30   | 30   | 95   | 95  | 113  | 113 | 185  | 185 | 127  | 127 | 135  | 135  |     |     |
|       | 15 | Void | 171  | 171  | 47  | 47   | 229 | 229  | 27  | 27   | 63  | 63   | 61  | 61   | Void | 43   | 43   | 7    | 7   | 78   | 78  | 82   | 82  | 137  | 137 | Evap | Void |     |     |
|       | 16 | Void | Void | 117  | 117 | 117  | 117 | 221  | 221 | 175  | 175 | 17   | 17  | Evap | 74   | 74   | Void | 217  | 217 | 153  | 153 | 215  | 215 | 92   | 92  | 184  | 184  | 100 | 100 |
|       | 17 | Void | 223  | 223  | 82  | 82   | 269 | 269  | 70  | 70   | 189 | 189  | 235 | 235  | Void | 200  | 200  | Evap | 155 | 155  | 217 | 217  | 195 | 195  | 207 | 207  | Void |     |     |
|       | 18 | Void | Void | Evap | 165 | 165  | 256 | 256  | 149 | 149  | 151 | 151  | 285 | 285  | Void | 108  | 108  | 126  | 126 | 79   | 79  | 205  | 205 | 47   | 47  | 23   | 23   |     |     |
|       | 19 | Void | 208  | 208  | 12  | 12   | 140 | 140  | 18  | 18   | 291 | 291  | 78  | 78   | Void | 199  | 199  | 190  | 190 | 201  | 201 | 290  | 290 | Evap | 210 | 210  | Void |     |     |
|       | 20 | Void | Void | 119  | 119 | 93   | 93  | 84   | 84  | Evap | 225 | 225  | 125 | 125  | Void | 64   | 64   | 299  | 299 | 63   | 63  | 174  | 174 | 283  | 283 | 116  | 116  |     |     |
|       | 21 | Void | 54   | 54   | 143 | 143  | 7   | 7    | 33  | 33   | 160 | 160  | 46  | 46   | Void | Evap | 297  | 297  | 20  | 20   | 255 | 255  | 287 | 287  | 133 | 133  | Void |     |     |
|       | 22 | Void | Void | 227  | 227 | Evap | 198 | 198  | 144 | 144  | 32  | 32   | 10  | 10   | Void | 260  | 260  | 60   | 60  | 123  | 123 | 145  | 145 | 178  | 178 | 159  | 159  |     |     |
|       | 23 | Void | 261  | 261  | 45  | 45   | 141 | 141  | 34  | 34   | 128 | 128  | 192 | 192  | Void | 202  | 202  | 236  | 236 | 147  | 147 | Evap | 222 | 222  | 175 | 175  | Void |     |     |
|       | 24 | Void | Void | 153  | 153 | 36   | 36  | 197  | 197 | 259  | 259 | 99   | 99  | Evap | Void | 286  | 286  | 244  | 244 | 83   | 83  | 220  | 220 | 57   | 57  | 232  | 232  |     |     |

d

*indica*

NW Smarthouse Positions

|       |    |      |      |      |    |      |    |      |    |      |    |    |    |      |      |      |      |      |   |      |   |      |   |   |   |      |      |      |      |
|-------|----|------|------|------|----|------|----|------|----|------|----|----|----|------|------|------|------|------|---|------|---|------|---|---|---|------|------|------|------|
|       |    | 26   | 25   | 24   | 23 | 22   | 21 | 20   | 19 | 18   | 17 | 16 | 15 | 14   | 13   | 12   | 11   | 10   | 9 | 8    | 7 | 6    | 5 | 4 | 3 | 2    | 1    |      |      |
| Lanes | 1  | Void | 1    | 2    | 2  | 1    | 1  | 2    | 2  | 1    | 1  | 2  | 1  | 2    | Void | 2    | 1    | 1    | 2 | Evap | 2 | 1    | 1 | 2 | 2 | 1    | Void |      |      |
|       | 2  | Void | Void | 1    | 2  | 2    | 1  | Evap | 1  | 2    | 1  | 2  | 2  | 1    | Void | 1    | 2    | 2    | 1 | 1    | 2 | 1    | 2 | 1 | 2 | 1    | 2    |      |      |
|       | 3  | Void | 2    | 1    | 2  | 1    | 2  | 1    | 2  | 1    | 2  | 1  | 1  | 2    | Void | 1    | 2    | 1    | 2 | 2    | 1 | 2    | 1 | 1 | 2 | Evap | Void |      |      |
|       | 4  | Void | Void | 1    | 2  | 1    | 2  | 1    | 2  | 1    | 2  | 1  | 2  | Evap | 1    | 2    | Void | 2    | 1 | 1    | 2 | 1    | 2 | 2 | 1 | 2    | 1    | 2    |      |
|       | 5  | Void | 1    | 2    | 1  | 2    | 2  | 1    | 2  | 1    | 2  | 1  | 2  | 1    | Void | 2    | 1    | Evap | 2 | 1    | 1 | 2    | 2 | 1 | 1 | 2    | Void |      |      |
|       | 6  | Void | Void | Evap | 2  | 1    | 2  | 1    | 2  | 1    | 2  | 1  | 2  | 2    | 1    | Void | 1    | 2    | 1 | 2    | 1 | 2    | 2 | 1 | 2 | 1    | 1    | 2    |      |
|       | 7  | Void | 2    | 1    | 1  | 2    | 1  | 2    | 1  | 2    | 1  | 2  | 1  | 2    | Void | 2    | 1    | 1    | 2 | 2    | 1 | 1    | 2 | 1 | 2 | Evap | 2    | 1    | Void |
|       | 8  | Void | Void | 2    | 1  | 2    | 1  | 1    | 2  | Evap | 1  | 2  | 2  | 1    | Void | 1    | 2    | 2    | 1 | 1    | 2 | 2    | 1 | 2 | 1 | 2    | 1    |      |      |
|       | 9  | Void | 1    | 2    | 2  | 1    | 1  | 2    | 2  | 1    | 2  | 1  | 1  | 2    | Void | Evap | 1    | 2    | 1 | 2    | 2 | 1    | 1 | 2 | 1 | 2    | 2    | Void |      |
|       | 10 | Void | Void | 1    | 2  | Evap | 2  | 1    | 2  | 1    | 2  | 1  | 1  | 2    | Void | 1    | 2    | 2    | 1 | 1    | 2 | 1    | 2 | 1 | 2 | 2    | 1    |      |      |
|       | 11 | Void | 2    | 1    | 1  | 2    | 2  | 1    | 2  | 1    | 2  | 1  | 1  | 2    | Void | 2    | 1    | 2    | 1 | 1    | 2 | Evap | 2 | 1 | 1 | 2    | Void |      |      |
|       | 12 | Void | Void | 2    | 1  | 2    | 1  | 2    | 1  | 2    | 1  | 1  | 2  | Evap | Void | 2    | 1    | 1    | 2 | 1    | 2 | 2    | 1 | 1 | 2 | 2    | 1    |      |      |
|       | 13 | Void | 2    | 1    | 2  | 1    | 1  | 2    | 1  | 2    | 2  | 1  | 2  | 1    | Void | 1    | 2    | 1    | 2 | Evap | 1 | 2    | 1 | 2 | 2 | 2    | 1    | Void |      |
|       | 14 | Void | Void | 1    | 2  | 1    | 2  | Evap | 1  | 2    | 1  | 2  | 1  | 2    | Void | 1    | 2    | 1    | 2 | 1    | 2 | 2    | 1 | 1 | 2 | 1    | 2    |      |      |
|       | 15 | Void | 2    | 1    | 2  | 1    | 1  | 2    | 2  | 1    | 1  | 2  | 2  | 1    | Void | 1    | 2    | 1    | 2 | 2    | 1 | 1    | 2 | 1 | 2 | Evap | Void |      |      |
|       | 16 | Void | Void | 2    | 1  | 1    | 2  | 1    | 2  | 1    | 2  | 1  | 2  | Evap | 2    | 1    | Void | 2    | 1 | 2    | 1 | 2    | 1 | 2 | 2 | 2    | 1    |      |      |
|       | 17 | Void | 1    | 2    | 1  | 2    | 1  | 2    | 2  | 1    | 2  | 1  | 1  | 2    | Void | 1    | 2    | Evap | 1 | 2    | 2 | 1    | 1 | 2 | 2 | 1    | Void |      |      |
|       | 18 | Void | Void | Evap | 2  | 1    | 2  | 1    | 2  | 1    | 2  | 1  | 1  | 2    | Void | 2    | 1    | 2    | 1 | 2    | 1 | 1    | 2 | 1 | 2 | 2    | 1    |      |      |
|       | 19 | Void | 2    | 1    | 2  | 1    | 2  | 1    | 1  | 2    | 2  | 1  | 2  | 1    | Void | 2    | 1    | 2    | 1 | 1    | 2 | 1    | 2 | 1 | 2 | Evap | 2    | 1    | Void |
|       | 20 | Void | Void | 2    | 1  | 1    | 2  | 1    | 2  | Evap | 1  | 2  | 2  | 1    | Void | 2    | 1    | 2    | 1 | 1    | 2 | 1    | 2 | 2 | 1 | 2    | 1    |      |      |
|       | 21 | Void | 2    | 1    | 2  | 1    | 2  | 1    | 1  | 2    | 2  | 1  | 2  | 1    | Void | Evap | 1    | 2    | 1 | 2    | 1 | 2    | 2 | 1 | 2 | 2    | 1    | Void |      |
|       | 22 | Void | Void | 1    | 2  | Evap | 2  | 1    | 2  | 1    | 2  | 1  | 2  | 1    | Void | 1    | 2    | 2    | 1 | 2    | 1 | 2    | 1 | 1 | 2 | 1    | 2    |      |      |
|       | 23 | Void | 2    | 1    | 1  | 2    | 1  | 2    | 1  | 2    | 2  | 1  | 2  | 1    | Void | 1    | 2    | 2    | 1 | 1    | 2 | Evap | 2 | 1 | 2 | 1    | Void |      |      |
|       | 24 | Void | Void | 1    | 2  | 1    | 2  | 1    | 2  | 2    | 1  | 1  | 2  | Evap | Void | 2    | 1    | 2    | 1 | 2    | 1 | 2    | 1 | 1 | 2 | 1    | 2    |      |      |

e

aus

NE Smarthouse Positions

|       |    |      |      |     |      |     |      |     |      |     |      |     |      |      |      |     |      |     |      |     |      |     |      |      |      |      |      |      |      |      |      |      |      |      |      |      |      |
|-------|----|------|------|-----|------|-----|------|-----|------|-----|------|-----|------|------|------|-----|------|-----|------|-----|------|-----|------|------|------|------|------|------|------|------|------|------|------|------|------|------|------|
|       |    | 1    | 2    | 3   | 4    | 5   | 6    | 7   | 8    | 9   | 10   | 11  | 12   | 13   | 14   | 15  | 16   | 17  | 18   | 19  | 20   | 21  | 22   | 23   | 24   | 25   | 26   |      |      |      |      |      |      |      |      |      |      |
| Lanes | 1  | Void | 226  | 226 | 225  | 225 | 65   | 65  | Evap | 111 | 111  | 237 | 237  | Void | 195  | 195 | 68   | 68  | 89   | 89  | 73   | 73  | 95   | 95   | 198  | 198  | Void | Void |      |      |      |      |      |      |      |      |      |
|       | 2  | 16   | 16   | 61  | 61   | 30  | 30   | 115 | 115  | 86  | 86   | 145 | 145  | Void | 176  | 176 | 161  | 161 | 110  | 110 | Evap | 163 | 163  | 33   | 33   | Void | Void | Void | Void |      |      |      |      |      |      |      |      |
|       | 3  | Void | Evap | 3   | 3    | 57  | 57   | 197 | 197  | 200 | 200  | 217 | 217  | Void | 102  | 102 | 103  | 103 | 44   | 44  | 126  | 126 | 251  | 251  | 6    | 6    | Void | Void |      |      |      |      |      |      |      |      |      |
|       | 4  | 75   | 75   | 99  | 99   | 159 | 159  | 208 | 208  | 141 | 141  | 133 | 133  | Void | 90   | 90  | Evap | 210 | 210  | 40  | 40   | 240 | 240  | 194  | 194  | Void | Void | Void | Void |      |      |      |      |      |      |      |      |
|       | 5  | Void | 178  | 178 | 20   | 20  | 120  | 120 | 83   | 83  | Evap | 96  | 96   | Void | 59   | 59  | 100  | 100 | 157  | 157 | 245  | 245 | 81   | 81   | 84   | 84   | Void | Void | Void | Void |      |      |      |      |      |      |      |
|       | 6  | 193  | 193  | 125 | 125  | 15  | 15   | 104 | 104  | 38  | 38   | 228 | 228  | Void | 52   | 52  | 144  | 144 | 180  | 180 | 9    | 9   | 5    | 5    | Evap | Void | Void | Void | Void | Void |      |      |      |      |      |      |      |
|       | 7  | Void | 196  | 196 | Evap | 255 | 255  | 106 | 106  | 147 | 147  | 224 | 224  | Void | 1    | 1   | 24   | 24  | 36   | 36  | 98   | 98  | 136  | 136  | 62   | 62   | Void | Void | Void | Void |      |      |      |      |      |      |      |
|       | 8  | 257  | 257  | 17  | 17   | 177 | 177  | 54  | 54   | 181 | 181  | 148 | 148  | Void | 29   | 29  | 137  | 137 | Evap | 101 | 101  | 223 | 223  | 27   | 27   | Void | Void | Void | Void | Void | Void |      |      |      |      |      |      |
|       | 9  | Void | 233  | 233 | 118  | 118 | 240  | 240 | 185  | 185 | 87   | 87  | Evap | Void | 65   | 65  | 254  | 254 | 45   | 45  | 137  | 137 | 14   | 14   | 172  | 172  | Void | Void | Void | Void | Void | Void |      |      |      |      |      |
|       | 10 | Void | 191  | 191 | 203  | 203 | 72   | 72  | 259  | 259 | 230  | 230 | 165  | 165  | Void | 236 | 236  | 200 | 200  | 123 | 123  | 149 | 149  | Evap | 238  | 238  | Void | Void | Void | Void | Void | Void |      |      |      |      |      |
|       | 11 | Void | 198  | 198 | 244  | 244 | Evap | 70  | 70   | 31  | 31   | 151 | 151  | Void | 121  | 121 | 164  | 164 | 171  | 171 | 106  | 106 | 250  | 250  | 217  | 217  | Void | Void | Void | Void | Void | Void |      |      |      |      |      |
|       | 12 | 134  | 134  | 162 | 162  | 105 | 105  | 181 | 181  | 152 | 152  | 150 | 150  | Void | Evap | 28  | 28   | 194 | 194  | 112 | 112  | 10  | 10   | 108  | 108  | Void | Void | Void | Void | Void | Void | Void | Void |      |      |      |      |
|       | 13 | Void | 232  | 232 | 129  | 129 | 78   | 78  | Evap | 21  | 21   | 192 | 192  | Void | 110  | 110 | 246  | 246 | 91   | 91  | 55   | 55  | 227  | 227  | 32   | 32   | Void | Void | Void | Void | Void | Void | Void | Void |      |      |      |
|       | 14 | 145  | 145  | 8   | 8    | 229 | 229  | 220 | 220  | 221 | 221  | 199 | 199  | Void | 153  | 153 | 216  | 216 | 215  | 215 | Evap | 197 | 197  | 214  | 214  | Void | Void | Void | Void | Void | Void | Void | Void | Void |      |      |      |
|       | 15 | Void | Evap | 50  | 50   | 176 | 176  | 12  | 12   | 179 | 179  | 180 | 180  | Void | 206  | 206 | 18   | 18  | 225  | 225 | 42   | 42  | 224  | 224  | 96   | 96   | Void | Void | Void | Void | Void | Void | Void | Void |      |      |      |
|       | 16 | 160  | 160  | 74  | 74   | 27  | 27   | 1   | 1    | 205 | 205  | 9   | 9    | Void | 16   | 16  | Evap | 83  | 83   | 80  | 80   | 22  | 22   | 88   | 88   | Void | Void | Void | Void | Void | Void | Void | Void | Void | Void |      |      |
|       | 17 | Void | 239  | 239 | 127  | 127 | 109  | 109 | 13   | 13  | Evap | 7   | 7    | Void | 218  | 218 | 81   | 81  | 19   | 19  | 202  | 202 | 256  | 256  | 23   | 23   | Void | Void | Void | Void | Void | Void | Void | Void | Void |      |      |
|       | 18 | 24   | 24   | 77  | 77   | 64  | 64   | 5   | 5    | 34  | 34   | 11  | 11   | Void | 174  | 174 | 163  | 163 | 184  | 184 | 166  | 166 | 226  | 226  | Evap | Void | Void | Void | Void | Void | Void | Void | Void | Void | Void |      |      |
|       | 19 | Void | 33   | 33  | Evap | 132 | 132  | 131 | 131  | 201 | 201  | 196 | 196  | Void | 187  | 187 | 177  | 177 | 154  | 154 | 146  | 146 | 2    | 2    | 252  | 252  | Void | Void | Void | Void | Void | Void | Void | Void | Void | Void |      |
|       | 20 | 53   | 53   | 79  | 79   | 183 | 183  | 222 | 222  | 82  | 82   | 219 | 219  | Void | 204  | 204 | 211  | 211 | Evap | 116 | 116  | 20  | 20   | 186  | 186  | Void | Void | Void | Void | Void | Void | Void | Void | Void | Void | Void |      |
|       | 21 | Void | 103  | 103 | 4    | 4   | 29   | 29  | 76   | 76  | 61   | 61  | Evap | Void | 43   | 43  | 107  | 107 | 175  | 175 | 111  | 111 | 111  | 133  | 133  | 36   | 36   | Void | Void | Void | Void | Void | Void | Void | Void | Void |      |
|       | 22 | 59   | 59   | 168 | 168  | 182 | 182  | 247 | 247  | 257 | 257  | 136 | 136  | Void | 25   | 25  | 122  | 122 | 44   | 44  | 212  | 212 | Evap | 115  | 115  | Void | Void | Void | Void | Void | Void | Void | Void | Void | Void | Void | Void |
|       | 23 | Void | 135  | 135 | 113  | 113 | Evap | 253 | 253  | 93  | 93   | 167 | 167  | Void | 37   | 37  | 139  | 139 | 69   | 69  | 155  | 155 | 158  | 158  | 63   | 63   | Void | Void | Void | Void | Void | Void | Void | Void | Void | Void | Void |
|       | 24 | 231  | 231  | 38  | 38   | 207 | 207  | 71  | 71   | 241 | 241  | 119 | 119  | Void | Evap | 41  | 41   | 49  | 49   | 243 | 243  | 242 | 242  | 39   | 39   | Void | Void | Void | Void | Void | Void | Void | Void | Void | Void | Void | Void |

f

aus

NE Smarthouse Positions

|       |    |      |      |   |      |      |      |   |      |   |      |    |    |      |      |    |      |    |      |    |      |    |      |    |    |      |      |      |      |      |      |      |      |      |      |      |      |      |
|-------|----|------|------|---|------|------|------|---|------|---|------|----|----|------|------|----|------|----|------|----|------|----|------|----|----|------|------|------|------|------|------|------|------|------|------|------|------|------|
|       |    | 1    | 2    | 3 | 4    | 5    | 6    | 7 | 8    | 9 | 10   | 11 | 12 | 13   | 14   | 15 | 16   | 17 | 18   | 19 | 20   | 21 | 22   | 23 | 24 | 25   | 26   |      |      |      |      |      |      |      |      |      |      |      |
| Lanes | 1  | Void | 2    | 1 | 1    | 2    | 1    | 2 | Evap | 2 | 1    | 2  | 1  | Void | 2    | 1  | 1    | 2  | 1    | 2  | 2    | 1  | 1    | 2  | 1  | 2    | Void | Void |      |      |      |      |      |      |      |      |      |      |
|       | 2  | 2    | 1    | 2 | 1    | 1    | 2    | 2 | 1    | 2 | 1    | 1  | 2  | Void | 2    | 1  | 2    | 1  | 2    | 1  | Evap | 2  | 1    | 2  | 1  | Void | Void | Void | Void |      |      |      |      |      |      |      |      |      |
|       | 3  | Void | Evap | 1 | 2    | 1    | 2    | 1 | 2    | 2 | 1    | 2  | 1  | Void | 1    | 2  | 2    | 1  | 1    | 2  | 2    | 1  | 1    | 2  | 1  | 2    | Void | Void | Void | Void |      |      |      |      |      |      |      |      |
|       | 4  | 1    | 2    | 2 | 1    | 1    | 2    | 2 | 1    | 1 | 2    | 2  | 1  | Void | 2    | 1  | Evap | 2  | 1    | 2  | 1    | 1  | 2    | 2  | 1  | 2    | Void | Void | Void | Void | Void | Void | Void | Void |      |      |      |      |
|       | 5  | Void | 2    | 1 | 2    | 1    | 2    | 1 | 2    | 1 | Evap | 1  | 2  | Void | 1    | 2  | 1    | 2  | 2    | 1  | 2    | 1  | 1    | 2  | 1  | 2    | Void | Void | Void | Void | Void | Void | Void | Void | Void |      |      |      |
|       | 6  | 2    | 1    | 2 | 1    | 1    | 2    | 1 | 2    | 1 | 2    | 2  | 1  | Void | 2    | 1  | 2    | 1  | 1    | 2  | 1    | 2  | 1    | 2  | 2  | 1    | Evap | Void | Void | Void | Void | Void | Void | Void | Void |      |      |      |
|       | 7  | Void | 1    | 2 | 2    | Evap | 2    | 1 | 2    | 1 | 1    | 2  | 1  | 2    | Void | 2  | 1    | 1  | 2    | 2  | 1    | 2  | 1    | 2  | 1  | 2    | 2    | 1    | Void | Void | Void | Void | Void | Void | Void | Void |      |      |
|       | 8  | 1    | 2    | 1 | 2    | 2    | 1    | 1 | 2    | 1 | 2    | 2  | 1  | Void | 2    | 1  | 1    | 2  | Evap | 1  | 2    | 1  | 2    | 1  | 2  | 1    | 2    | Void | Void | Void | Void | Void | Void | Void | Void | Void |      |      |
|       | 9  | Void | 1    | 2 | 1    | 2    | 2    | 1 | 2    | 1 | 2    | 1  | 2  | Evap | Void | 1  | 2    | 2  | 1    | 1  | 2    | 1  | 2    | 2  | 1  | 1    | 2    | Void | Void | Void | Void | Void | Void | Void | Void | Void |      |      |
|       | 10 | 2    | 1    | 1 | 2    | 1    | 2    | 2 | 1    | 1 | 2    | 2  | 1  | Void | 2    | 1  | 1    | 2  | 1    | 2  | 2    | 1  | Evap | 1  | 1  | 2    | Void | Void | Void | Void | Void | Void | Void | Void | Void | Void | Void |      |
|       | 11 | Void | 1    | 2 | 1    | 2    | Evap | 2 | 1    | 1 | 2    | 2  | 1  | Void | 1    | 2  | 2    | 1  | 2    | 1  | 2    | 1  | 2    | 1  | 2  | 1    | 1    | 2    | Void | Void | Void | Void | Void | Void | Void | Void | Void |      |
|       | 12 | 2    | 1    | 2 | 1    | 1    | 2    | 2 | 1    | 2 | 1    | 1  | 2  | Void | Evap | 1  | 2    | 2  | 1    | 1  | 2    | 1  | 2    | 1  | 2  | 1    | 2    | Void | Void | Void | Void | Void | Void | Void | Void | Void | Void |      |
|       | 13 | Void | 2    | 1 | 1    | 2    | 1    | 2 | Evap | 2 | 1    | 2  | 1  | 2    | Void | 2  | 1    | 1  | 2    | 1  | 2    | 2  | 1    | 2  | 2  | 1    | 2    | Void | Void | Void | Void | Void | Void | Void | Void | Void | Void | Void |
|       | 14 | 2    | 1    | 2 | 1    | 2    | 1    | 1 | 2    | 2 | 1    | 1  | 2  | Void | 1    | 2  | 1    | 2  | 1    | 2  | Evap | 2  | 1    | 1  | 2  | Void | Void | Void | Void | Void | Void | Void | Void | Void | Void | Void | Void | Void |
|       | 15 | Void | Evap | 1 | 2    | 1    | 2    | 1 | 2    | 2 | 1    | 1  | 2  | Void | 1    | 2  | 2    | 1  | 2    | 1  | 1    | 2  | 1    | 2  | 2  | 1    | Void | Void | Void | Void | Void | Void | Void | Void | Void | Void | Void | Void |
|       | 16 | 1    | 2    | 1 | 2    | 2    | 1    | 1 | 2    | 1 | 2    | 1  | 2  | Void | 2    | 1  | Evap | 1  | 2    | 2  | 1    | 2  | 1    | 2  | 1  | 2    | Void | Void | Void | Void | Void | Void | Void | Void | Void | Void | Void | Void |
|       | 17 | Void | 2    | 1 | 1    | 2    | 2    | 1 | 1    | 2 | Evap | 2  | 1  | Void | 2    | 1  | 1    | 2  | 1    | 2  | 1    | 2  | 1    | 2  | 2  | 1    | 2    | Void | Void | Void | Void | Void | Void | Void | Void | Void | Void | Void |
|       | 18 | 1    | 2    | 1 | 2    | 2    | 1    | 1 | 2    | 1 | 2    | 2  | 1  | Void | 1    | 2  | 1    | 2  | 1    | 2  | 2    | 1  | 1    | 2  | 2  | 1    | Evap | Void | Void | Void | Void | Void | Void | Void | Void | Void | Void | Void |
|       | 19 | Void | 2    | 1 | Evap | 2    | 1    | 2 | 1    | 1 | 2    | 2  | 1  | Void | 2    | 1  | 2    | 1  | 2    | 1  | 2    | 1  | 2    | 1  | 2  | 2    | 1    | Void | Void | Void | Void | Void | Void | Void | Void | Void | Void | Void |
|       | 20 | 1    | 2    | 2 | 1    | 2    | 1    | 1 | 2    | 2 | 1    | 1  | 2  | Void | 2    | 1  | 2    | 1  | Ev   |    |      |    |      |    |    |      |      |      |      |      |      |      |      |      |      |      |      |      |



g

aus

NW Smarthouse Positions

|       |    |      |      |      |     |      |     |      |     |      |     |      |     |      |      |      |     |      |     |      |     |      |     |      |     |      |      |      |
|-------|----|------|------|------|-----|------|-----|------|-----|------|-----|------|-----|------|------|------|-----|------|-----|------|-----|------|-----|------|-----|------|------|------|
|       |    | 26   | 25   | 24   | 23  | 22   | 21  | 20   | 19  | 18   | 17  | 16   | 15  | 14   | 13   | 12   | 11  | 10   | 9   | 8    | 7   | 6    | 5   | 4    | 3   | 2    | 1    |      |
| Lanes | 1  | Void | 79   | 79   | 231 | 231  | 30  | 30   | 209 | 209  | 14  | 14   | 147 | 147  | Void | 245  | 245 | 91   | 91  | Evap | 236 | 236  | 237 | 237  | 148 | 148  | Void |      |
|       | 2  | Void | Void | 167  | 167 | 51   | 51  | Evap | 105 | 105  | 125 | 125  | 243 | 243  | Void | 101  | 101 | 43   | 43  | 163  | 163 | 204  | 204 | 239  | 239 | 254  | 254  | Void |
|       | 3  | Void | 47   | 47   | 189 | 189  | 66  | 66   | 134 | 134  | 62  | 62   | 155 | 155  | Void | 203  | 203 | 188  | 188 | 157  | 157 | 227  | 227 | 140  | 140 | Evap | Void |      |
|       | 4  | Void | Void | 170  | 170 | 89   | 89  | 247  | 247 | 162  | 162 | Evap | 259 | 259  | Void | 232  | 232 | 126  | 126 | 173  | 173 | 206  | 206 | 48   | 48  | 242  | 242  | Void |
|       | 5  | Void | 141  | 141  | 31  | 31   | 78  | 78   | 2   | 2    | 178 | 178  | 123 | 123  | Void | 220  | 220 | Evap | 45  | 45   | 228 | 228  | 25  | 25   | 112 | 112  | Void |      |
|       | 6  | Void | Void | Evap | 219 | 219  | 255 | 255  | 248 | 248  | 21  | 21   | 143 | 143  | Void | 132  | 132 | 202  | 202 | 68   | 68  | 39   | 39  | 90   | 90  | 152  | 152  | Void |
|       | 7  | Void | 246  | 246  | 113 | 113  | 75  | 75   | 72  | 72   | 95  | 95   | 144 | 144  | Void | 124  | 124 | 56   | 56  | 88   | 88  | 221  | 221 | Evap | 223 | 223  | Void |      |
|       | 8  | Void | Void | 52   | 52  | 46   | 46  | 201  | 201 | Evap | 214 | 214  | 60  | 60   | Void | 120  | 120 | 73   | 73  | 142  | 142 | 10   | 10  | 230  | 230 | 116  | 116  | Void |
|       | 9  | Void | 165  | 165  | 82  | 82   | 174 | 174  | 12  | 12   | 169 | 169  | 23  | 23   | Void | Evap | 94  | 94   | 63  | 63   | 85  | 85   | 137 | 137  | 22  | 22   | Void |      |
|       | 10 | Void | Void | 258  | 258 | Evap | 181 | 181  | 49  | 49   | 67  | 67   | 74  | 74   | Void | 161  | 161 | 58   | 58  | 6    | 6   | 195  | 195 | 135  | 135 | 117  | 117  | Void |
|       | 11 | Void | 234  | 234  | 168 | 168  | 76  | 76   | 50  | 50   | 146 | 146  | 57  | 57   | Void | 69   | 69  | 183  | 183 | 192  | 192 | Evap | 97  | 97   | 208 | 208  | Void |      |
|       | 12 | Void | Void | 8    | 8   | 35   | 35  | 156  | 156 | 106  | 106 | 53   | 53  | Evap | Void | 99   | 99  | 173  | 173 | 256  | 256 | 86   | 86  | 213  | 213 | 41   | 41   | Void |
|       | 13 | Void | 3    | 3    | 18  | 18   | 211 | 211  | 131 | 131  | 138 | 138  | 244 | 244  | Void | 40   | 40  | 87   | 87  | Evap | 32  | 32   | 28  | 28   | 218 | 218  | Void |      |
|       | 14 | Void | Void | 17   | 17  | 154  | 154 | Evap | 92  | 92   | 114 | 114  | 55  | 55   | Void | 235  | 235 | 172  | 172 | 128  | 128 | 100  | 100 | 102  | 102 | 104  | 104  | Void |
|       | 15 | Void | 139  | 139  | 199 | 199  | 190 | 190  | 4   | 4    | 193 | 193  | 71  | 71   | Void | 85   | 85  | 210  | 210 | 251  | 251 | 84   | 84  | 98   | 98  | Evap | Void |      |
|       | 16 | Void | Void | 54   | 54  | 130  | 130 | 122  | 122 | 26   | 26  | Evap | 159 | 159  | Void | 186  | 186 | 129  | 129 | 42   | 42  | 249  | 249 | 119  | 119 | 250  | 250  | Void |
|       | 17 | Void | 209  | 209  | 128 | 128  | 109 | 109  | 48  | 48   | 121 | 121  | 108 | 108  | Void | 51   | 51  | Evap | 153 | 153  | 66  | 66   | 205 | 205  | 234 | 234  | Void |      |
|       | 18 | Void | Void | Evap | 58  | 58   | 15  | 15   | 127 | 127  | 130 | 130  | 47  | 47   | Void | 184  | 184 | 35   | 35  | 169  | 169 | 233  | 233 | 187  | 187 | 216  | 216  | Void |
|       | 19 | Void | 13   | 13   | 97  | 97   | 11  | 11   | 39  | 39   | 215 | 215  | 188 | 188  | Void | 80   | 80  | 164  | 164 | 149  | 149 | 46   | 46  | Evap | 172 | 172  | Void |      |
|       | 20 | Void | Void | 25   | 25  | 207  | 207 | 229  | 229 | Evap | 160 | 160  | 179 | 179  | Void | 156  | 156 | 189  | 189 | 19   | 19  | 37   | 37  | 92   | 92  | 94   | 94   | Void |
|       | 21 | Void | 77   | 77   | 107 | 107  | 117 | 117  | 158 | 158  | 170 | 170  | 142 | 142  | Void | Evap | 249 | 249  | 124 | 124  | 235 | 235  | 171 | 171  | 248 | 248  | Void |      |
|       | 22 | Void | Void | 206  | 206 | Evap | 143 | 143  | 56  | 56   | 140 | 140  | 151 | 151  | Void | 118  | 118 | 190  | 190 | 60   | 60  | 212  | 212 | 34   | 34  | 67   | 67   | Void |
|       | 23 | Void | 213  | 213  | 138 | 138  | 114 | 114  | 191 | 191  | 150 | 150  | 93  | 93   | Void | 182  | 182 | 241  | 241 | 258  | 258 | Evap | 166 | 166  | 26  | 26   | Void |      |
|       | 24 | Void | Void | 175  | 175 | 232  | 232 | 74   | 74  | 222  | 222 | 253  | 253 | Evap | Void | 185  | 185 | 64   | 64  | 252  | 252 | 7    | 7   | 70   | 70  | 238  | 238  | Void |

h

aus

NW Smarthouse Positions

|       |    |      |      |      |    |      |      |      |    |      |    |      |    |    |      |      |    |      |   |      |   |      |   |   |   |   |      |      |      |      |
|-------|----|------|------|------|----|------|------|------|----|------|----|------|----|----|------|------|----|------|---|------|---|------|---|---|---|---|------|------|------|------|
|       |    | 26   | 25   | 24   | 23 | 22   | 21   | 20   | 19 | 18   | 17 | 16   | 15 | 14 | 13   | 12   | 11 | 10   | 9 | 8    | 7 | 6    | 5 | 4 | 3 | 2 | 1    |      |      |      |
| Lanes | 1  | Void | 2    | 1    | 1  | 2    | 1    | 2    | 1  | 2    | 1  | 2    | 1  | 2  | Void | 2    | 1  | 2    | 1 | Evap | 2 | 1    | 1 | 2 | 1 | 2 | Void |      |      |      |
|       | 2  | Void | Void | 2    | 1  | 1    | 2    | Evap | 2  | 1    | 1  | 2    | 2  | 1  | Void | 2    | 1  | 1    | 2 | 1    | 2 | 2    | 1 | 1 | 2 | 2 | 1    | Void |      |      |
|       | 3  | Void | 1    | 2    | 2  | 1    | 2    | 1    | 2  | 1    | 2  | 1    | 2  | 1  | Void | 2    | 1  | 2    | 1 | 2    | 1 | 2    | 1 | 2 | 1 | 2 | 1    | Evap | Void |      |
|       | 4  | Void | Void | 1    | 2  | 1    | 2    | 2    | 1  | 1    | 2  | Evap | 2  | 1  | Void | 2    | 1  | 2    | 1 | 1    | 2 | 1    | 2 | 1 | 2 | 1 | 2    | 1    | Void |      |
|       | 5  | Void | 1    | 2    | 2  | 1    | 1    | 2    | 2  | 1    | 1  | 2    | 2  | 1  | Void | 1    | 2  | Evap | 1 | 2    | 1 | 2    | 1 | 2 | 1 | 2 | 1    | 2    | Void |      |
|       | 6  | Void | Void | Evap | 2  | 1    | 2    | 1    | 1  | 2    | 1  | 2    | 1  | 2  | Void | 2    | 1  | 1    | 2 | 2    | 1 | 2    | 1 | 2 | 1 | 2 | 1    | 2    | Void |      |
|       | 7  | Void | 1    | 2    | 1  | 2    | 1    | 2    | 1  | 2    | 1  | 2    | 1  | 2  | Void | 1    | 2  | 2    | 1 | 1    | 2 | 1    | 2 | 1 | 2 | 1 | Evap | 1    | 2    | Void |
|       | 8  | Void | Void | 2    | 1  | 1    | 2    | 2    | 1  | Evap | 2  | 1    | 1  | 2  | Void | 2    | 1  | 2    | 1 | 1    | 2 | 1    | 2 | 2 | 1 | 2 | 1    | 1    | 2    | Void |
|       | 9  | Void | 2    | 1    | 2  | 1    | 1    | 2    | 2  | 1    | 2  | 1    | 2  | 1  | Void | Evap | 1  | 2    | 1 | 2    | 2 | 1    | 2 | 1 | 1 | 2 | 1    | 2    | Void |      |
|       | 10 | Void | Void | 2    | 1  | 2    | Evap | 2    | 1  | 2    | 1  | 1    | 2  | 1  | 2    | Void | 1  | 2    | 2 | 1    | 1 | 2    | 2 | 1 | 2 | 1 | 1    | 2    | Void |      |
|       | 11 | Void | 2    | 1    | 2  | 1    | 2    | 1    | 1  | 2    | 1  | 2    | 2  | 1  | Void | 1    | 2  | 1    | 2 | 1    | 2 | Evap | 1 | 2 | 1 | 2 | 1    | 2    | Void |      |
|       | 12 | Void | Void | 1    | 2  | 2    | 1    | 1    | 2  | 1    | 2  | 1    | 2  | 1  | Evap | Void | 1  | 2    | 2 | 1    | 1 | 2    | 1 | 2 | 2 | 1 | 1    | 2    | Void |      |
|       | 13 | Void | 2    | 1    | 2  | 1    | 2    | 1    | 2  | 1    | 2  | 1    | 1  | 2  | Void | 1    | 2  | 1    | 2 | Evap | 1 | 2    | 1 | 2 | 1 | 2 | 2    | 1    | Void |      |
|       | 14 | Void | Void | 1    | 2  | 1    | 2    | Evap | 1  | 2    | 1  | 2    | 2  | 1  | Void | 2    | 1  | 2    | 1 | 2    | 1 | 2    | 1 | 2 | 1 | 2 | 2    | 1    | Void |      |
|       | 15 | Void | 2    | 1    | 2  | 1    | 2    | 1    | 2  | 1    | 2  | 1    | 1  | 2  | Void | 1    | 2  | 1    | 2 | 2    | 1 | 2    | 1 | 1 | 2 | 1 | 2    | Evap | Void |      |
|       | 16 | Void | Void | 2    | 1  | 2    | 1    | 1    | 2  | 1    | 2  | Evap | 1  | 2  | Void | 2    | 1  | 2    | 1 | 2    | 1 | 2    | 1 | 1 | 2 | 1 | 2    | 1    | Void |      |
|       | 17 | Void | 1    | 2    | 1  | 2    | 2    | 1    | 2  | 1    | 2  | 1    | 2  | 1  | Void | 1    | 2  | Evap | 1 | 2    | 2 | 1    | 2 | 1 | 2 | 1 | 2    | 1    | Void |      |
|       | 18 | Void | Void | Evap | 2  | 1    | 2    | 1    | 2  | 1    | 2  | 1    | 2  | 1  | Void | 1    | 2  | 2    | 1 | 2    | 1 | 2    | 1 | 2 | 1 | 2 | 1    | 1    | 2    | Void |
|       | 19 | Void | 1    | 2    | 1  | 2    | 2    | 1    | 2  | 1    | 2  | 1    | 2  | 1  | Void | 1    | 2  | 1    | 2 | 1    | 2 | 1    | 2 | 1 | 2 | 1 | Evap | 1    | 2    | Void |
|       | 20 | Void | Void | 1    | 2  | 1    | 2    | 1    | 2  | 1    | 2  | Evap | 2  | 1  | 2    | Void | 2  | 1    | 2 | 1    | 2 | 1    | 1 | 2 | 1 | 2 | 2    | 1    | Void |      |
|       | 21 | Void | 2    | 1    | 1  | 2    | 1    | 2    | 1  | 2    | 1  | 2    | 2  | 1  | Void | Evap | 1  | 2    | 2 | 1    | 2 | 1    | 2 | 1 | 2 | 1 | 2    | 1    | Void |      |
|       | 22 | Void | Void | 2    | 1  | Evap | 2    | 1    | 1  | 2    | 2  | 1    | 2  | 1  | Void | 2    | 1  | 1    | 2 | 1    | 2 | 1    | 2 | 1 | 2 | 1 | 1    | 2    | Void |      |
|       | 23 | Void | 2    | 1    | 1  | 2    | 1    | 2    | 2  | 1    | 2  | 1    | 1  | 2  | Void | 2    | 1  | 2    | 1 | 2    | 1 | Evap | 1 | 2 | 1 | 2 | Void |      |      |      |
|       | 24 | Void | Void | 1    | 2  | 2    | 1    | 1    | 2  | 1    | 2  | 1    | 2  | 1  | Evap | Void | 2  | 1    | 1 | 2    | 1 | 2    | 2 | 1 | 2 | 1 | 1    | 2    | Void |      |

Supplementary Figure 8: Conveyor layout of plants for both the *indica* and *aus* panels.

(a) The conveyor layout for the *indica* panel in the NE Smarthouse. The numbers in this figure represent the line numbers from 1 to 300. The replicated lines are colored

grey and the unreplicated lines are blue. Void carts are empty carts and Evap carts are evaporation carts. **(b)** The treatment layout for the *indica* panel in the NE Smarthouse. 1, control (no salt); 2, added salt; Void, empty carts; Evap, evaporation carts. **(c)** As **a**, with *indica* panel in the NW Smarthouse. **(d)** As **b**, with *indica* panel in the NW Smarthouse. **(e)** The conveyor layout for the *aus* panel in the NE Smarthouse. The numbers in this figure represent the line numbers from 1 to 259. The duplicated lines are colored grey and the thrice-replicated lines are blue. **(f)** As **d**, with treatment layout for the *aus* panel in the NE Smarthouse. **(g)** As **e**, with the conveyor layout for the *aus* panel in the NW Smarthouse. **(h)** As **f**, with treatment layout for the *aus* panel in the NW Smarthouse.

**a**

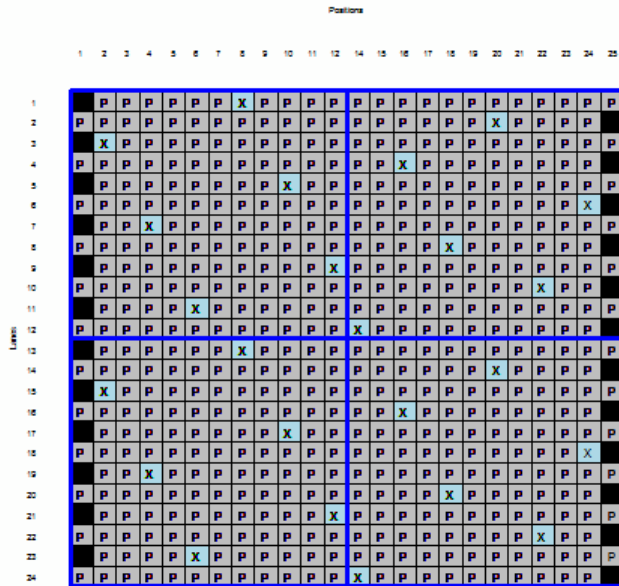

**b**

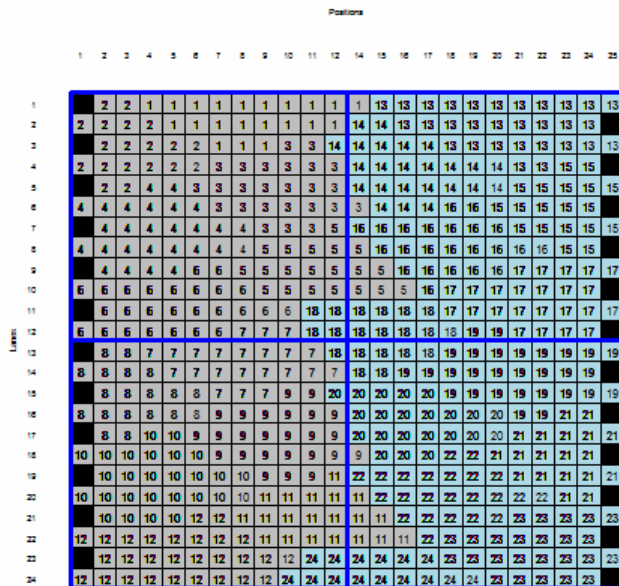

**Supplementary Figure 9: Arrangement of evaporation carts**

(a) One evaporation cart (blue X) amongst plant carts (P) was placed in every lane. The evaporation carts occurred between main plots, the odd lanes having a cart in positions 1–12 and the even lanes having a cart in positions 14–25. (b) Number of the closest evaporation cart for each cart. Evaporation carts are numbered going down the

left side and then down the right side. This information is used for spatial corrections of T and TUE.

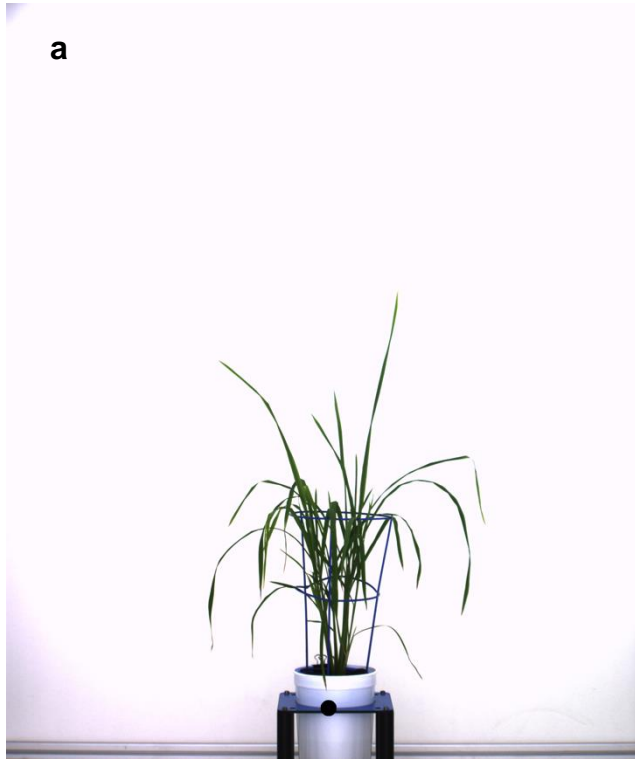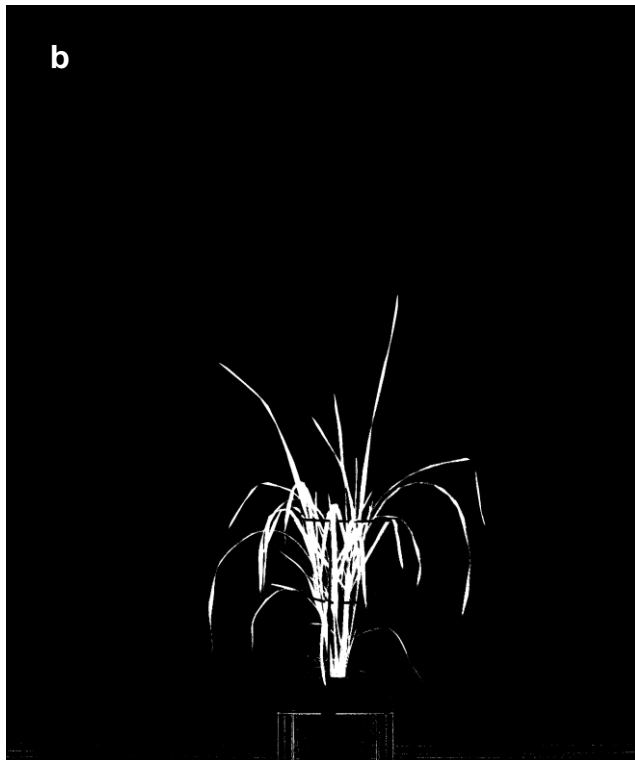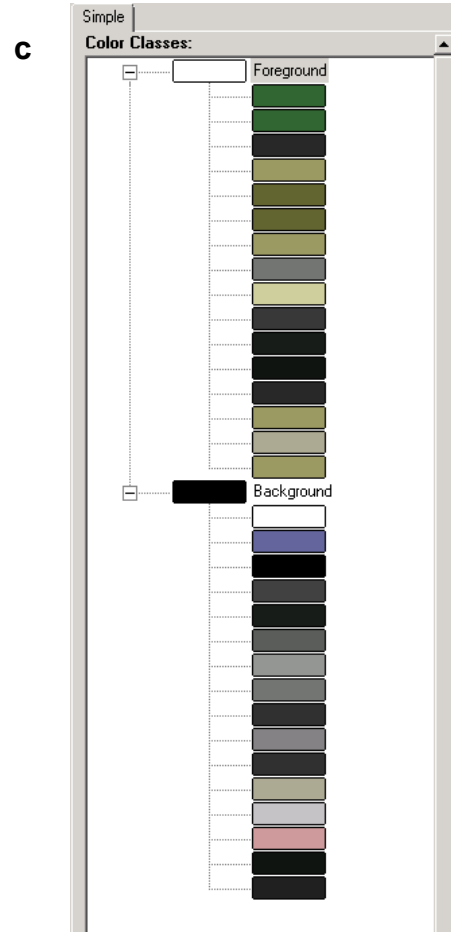

**Supplementary Figure 10: Image analysis differentiates foreground (plant pixels) from the background (non-plant pixels).**

(a) Example image of RGB side view. (b) Object extraction of the plant. (c) Color classes used to define foreground and background pixels from RGB images for the LemnaGrid Nearest Neighbor foreground-background color separation method.

**Supplementary Table 1: Summary statistics of average percentage decrease by the salt treatment in both *indica* and *aus* for relative growth rate (RGR), transpiration rate (TR) and transpiration use efficiency (TUE). Minimum values, maximum values, standard errors (SE), standard deviation (SD) and 95% confidence interval (CI) are also displayed.**

| Trait/ interval DAS | <i>indica</i>      |        |      |      |      |        | <i>aus</i>         |       |      |      |       |        |
|---------------------|--------------------|--------|------|------|------|--------|--------------------|-------|------|------|-------|--------|
|                     | Average % decrease | Min    | Max  | SE   | SD   | 95% CI | Average % decrease | Min   | Max  | SE   | SD    | 95% CI |
| <b>RGR.2to9</b>     | <b>28.0</b>        | -5.66  | 57.0 | 0.63 | 10.8 | 0.39   | <b>36.1</b>        | 8.30  | 56.9 | 0.60 | 8.80  | 1.09   |
| <b>RGR.2to6</b>     | <b>20.9</b>        | -10.59 | 48.6 | 0.57 | 9.8  | 0.36   | <b>29.0</b>        | 2.50  | 51.9 | 0.60 | 9.00  | 1.11   |
| <b>RGR.6to9</b>     | <b>39.1</b>        | 0.84   | 75.3 | 0.78 | 13.3 | 0.48   | <b>47.2</b>        | 9.10  | 74.3 | 0.60 | 10.1  | 1.24   |
| <b>RGR.9to13</b>    | <b>48.7</b>        | 4.86   | 86.1 | 0.87 | 14.9 | 0.54   | <b>47.6</b>        | 11.6  | 83.2 | 0.70 | 11.9  | 1.46   |
| <b>TR.2to9</b>      | <b>20.8</b>        | -37.23 | 58.4 | 0.73 | 12.4 | 0.45   | <b>30.4</b>        | -32.7 | 53.1 | 0.70 | 11.14 | 1.38   |
| <b>TR.2to6</b>      | <b>12.2</b>        | -39.63 | 52.9 | 0.75 | 12.9 | 0.47   | <b>15.8</b>        | -51.3 | 44.1 | 0.77 | 12.21 | 1.51   |
| <b>TR.6to9</b>      | <b>29.4</b>        | -38.75 | 63.8 | 0.73 | 12.5 | 0.45   | <b>41.3</b>        | -18.8 | 63.3 | 0.68 | 10.86 | 1.34   |
| <b>TR.9to13</b>     | <b>48.5</b>        | -34.92 | 73.9 | 0.67 | 11.5 | 0.42   | <b>57.4</b>        | 17.3  | 73.0 | 0.51 | 8.10  | 1.00   |
| <b>TUE.2to9</b>     | <b>23.3</b>        | -3.45  | 57.9 | 0.68 | 11.7 | 0.42   | <b>28.5</b>        | 3.12  | 58.0 | 0.62 | 9.90  | 1.22   |
| <b>TUE.2to6</b>     | <b>16.7</b>        | -11.89 | 48.1 | 0.61 | 10.3 | 0.38   | <b>24.4</b>        | 1.14  | 48.1 | 0.57 | 9.09  | 1.12   |
| <b>TUE.6to9</b>     | <b>30.8</b>        | -2.09  | 73.1 | 0.85 | 14.6 | 0.53   | <b>35.1</b>        | -6.05 | 72.3 | 0.80 | 12.70 | 1.57   |
| <b>TUE.9to13</b>    | <b>33.3</b>        | -12.52 | 82.7 | 1.13 | 19.3 | 0.70   | <b>28.1</b>        | -55.4 | 77.5 | 1.26 | 19.96 | 2.46   |

**Supplementary Table 2: Percentage decrease of relative growth rate and early growth response index (EGRI) for frequently studied rice varieties ‘Pokkali’ and ‘IR28’, both in the *indica* subpopulation.**

‘Pokkali’ is found in the literature to be a salt-tolerant variety and ‘IR28’ has been reported to be salt sensitive. This comparison between the two genotypes supports the phenotypic data measurements taken at The Plant Accelerator<sup>®</sup>.

| <b>Accession Name</b> | <b>Accession no.</b> | <b>RGR.2to9 % decrease</b> | <b>EGRI.2to9</b> |
|-----------------------|----------------------|----------------------------|------------------|
| <b>Pokkali</b>        | 122206               | 18.9                       | 0.81             |
| <b>IR28</b>           | 122094               | 26.9                       | 0.73             |



**Supplementary Table 3: Phenotypic traits.** List of phenotypic traits used in this study, with their abbreviation used in the text, their method of calculation and their units of measurement.

| Serial number | Main trait                         | Trait/Index name                        | Abbreviation     | Calculation                                   | Unit                       | Adapted from                             |
|---------------|------------------------------------|-----------------------------------------|------------------|-----------------------------------------------|----------------------------|------------------------------------------|
| 1             |                                    | Relative growth rate in control         | RGR <sub>c</sub> | See METHODS section                           | day <sup>-1</sup>          | 1                                        |
| 2             |                                    | Relative growth rate in salt            | RGR <sub>s</sub> |                                               | day <sup>-1</sup>          | 1                                        |
| 3             | Relative Growth Rate (RGR)         | Tolerance index                         | TOL              | RGR <sub>c</sub> - RGR <sub>s</sub>           | κpixels/day                | TOL index <sup>2</sup>                   |
| 4             |                                    | Early growth response index             | EGRI             | RGR <sub>s</sub> /RGR <sub>c</sub>            | -                          | Osmotic tolerance <sup>3</sup>           |
| 5             |                                    | Stress-weighted performance             | SWP              | $RGR_s / \sqrt{RGR_c}$                        | $\sqrt{\text{κpixel/day}}$ | (Saade, Pillen, & Tester unpublished)    |
| 6             |                                    | Stress susceptibility index             | SSI              | $(1 - (RGR_s/RGR_c)) / (RGR_{avs}/RGR_{avc})$ | -                          | Stress susceptibility index <sup>4</sup> |
| 7             |                                    | Stress tolerance index                  | STI              | $(RGR_c * RGR_s) / (RGR_{avc})^2$             | -                          | Stress Tolerance Index <sup>4</sup>      |
| 8             |                                    | Transpiration rate in control           | TR <sub>c</sub>  | See METHODS section                           | mL/day                     |                                          |
| 9             |                                    | Transpiration rate in salt              | TR <sub>s</sub>  |                                               | mL/day                     |                                          |
| 10            | Transpiration Rate (TR)            | Tolerance index in salt                 | TOL              | TR <sub>c</sub> - TR <sub>s</sub>             | mL/day                     | TOL index <sup>2</sup>                   |
| 11            |                                    | Salt/control                            | S/C              | TR <sub>s</sub> /TR <sub>c</sub>              | -                          | Salinity tolerance index                 |
| 12            |                                    | Stress-weighted performance             | SWP              | $TR_s / \sqrt{TR_c}$                          | $\sqrt{\text{mL/day}}$     | (Saade, Pillen, & Tester unpublished)    |
| 13            |                                    | Stress susceptibility index             | SSI              | $(1 - (TR_s/TR_c)) / (TR_{avs}/TR_{avc})$     | -                          | Stress susceptibility index <sup>4</sup> |
| 14            |                                    | Stress tolerance index                  | STI              | $(TR_c * TR_s) / (TR_{avc})^2$                | -                          | Stress Tolerance Index <sup>4</sup>      |
| 15            |                                    | Transpiration use efficiency in control | TUE <sub>c</sub> | See METHODS section                           | κpixels/mL                 |                                          |
| 16            |                                    | Transpiration use efficiency in salt    | TUE <sub>s</sub> |                                               | κpixels/mL                 |                                          |
| 17            | Transpiration Use Efficiency (TUE) | Tolerance index                         | TOL              | TUE <sub>c</sub> - TUE <sub>s</sub>           | κpixels/mL                 | TOL index <sup>2</sup>                   |
| 18            |                                    | Salt/control                            | S/C              | TUE <sub>s</sub> /TUE <sub>c</sub>            | -                          | Salinity tolerance index                 |
| 19            |                                    | Stress-weighted performance             | SWP              | $TUE_s / \sqrt{TUE_c}$                        | $\sqrt{\text{κpixel/mL}}$  | (Saade, Pillen, & Tester unpublished)    |
| 20            |                                    | Stress susceptibility index             | SSI              | $(1 - (TUE_s/TUE_c)) / TUE_{avs}/TUE_{avc}$   | -                          | Stress susceptibility index <sup>4</sup> |



**Supplementary Table 4: *indica* and *aus* accession codes.**

Information about the accessions grown, including accessions number and name for *indica* and *aus*

***indica***

| Seq.No | Acc.No | Acc.Name                       |
|--------|--------|--------------------------------|
| 1      | 120855 | 15577::IRGC 76987-1            |
| 2      | 120856 | 17/79/02-005::IRGC 51080-1     |
| 3      | 120859 | 849::IRGC 5970-1               |
| 4      | 121701 | 91-385::IRGC 63466-C1-G1       |
| 5      | 120860 | AGAMI M 1::IRGC 4158-1         |
| 6      | 120861 | AI LAN KE 1110::IRGC 67034-1   |
| 7      | 117636 | AI-CHIAO-HONG                  |
| 8      | 120862 | AN QING ZAO::IRGC 72577-1      |
| 9      | 120863 | ANAYANSI::IRGC 77474-1         |
| 10     | 121963 | ANGIFOTSY 685::GERVEX 4717-C1  |
| 11     | 121705 | APO::C1-G1                     |
| 12     | 121965 | ARANG::IRGC 43322-C1           |
| 13     | 120867 | ARC 10818::IRGC 21079-1        |
| 14     | 121708 | ARC 15872::IRGC 43249-C1-G1    |
| 15     | 120878 | B 6144 F-MR-6::IRGC 117313-1   |
| 16     | 120879 | BADA DHAN::IRGC 26540-1        |
| 17     | 121689 | BADKALAMKATI::IRGC 45011-1     |
| 18     | 120880 | BAI HE::IRGC 76437-1           |
| 19     | 120882 | BALGALA GURMATIA::IRGC 61074-1 |
| 20     | 120883 | BAMAWPYAN::IRGC 72458-1        |
| 21     | 120885 | BANDIOUROU::IRGC 15980-1       |
| 22     | 120892 | BG 301::IRGC 117315-1          |
| 23     | 120893 | BG 34-11::IRGC 15782-1         |
| 24     | 121716 | BH 2::C1-G1                    |
| 25     | 117659 | BINULAWAN                      |
| 26     | 120895 | BIRAIN 360::IRGC 6550-1        |
| 27     | 121717 | BODOMANO::GERVEX 8343-C1-G1    |
| 28     | 121990 | BOTRA MAITSO::GERVEX 8389-C1   |
| 29     | 121721 | BOTRIKELY::GERVEX 8404-C1-G1   |
| 30     | 117623 | BR24                           |
| 31     | 120904 | BYAT KYAR::IRGC 33004-1        |
| 32     | 121722 | C 21::IRGC 331-C1-G1           |
| 33     | 122000 | CARREON::IRGC 32575-C1         |
| 34     | 117443 | CERE AIR::IRGC 43369-1         |
| 35     | 117681 | CHANG CH'SANG HSU TAO          |
| 36     | 117682 | CHAU                           |
| 37     | 121725 | CHERIVIRUPPU::IRGC 19928-C1-G1 |
| 38     | 120909 | CHI TOU HUANG 1::IRGC 51280-1  |
| 39     | 117684 | CHIEM CHANH                    |
| 40     | 120912 | CHINA 98-45-1::IRGC 1598-1     |
| 41     | 117447 | CHITRAJ (DA 23)::IRGC 6208-1   |

|    |        |                                     |
|----|--------|-------------------------------------|
| 42 | 120913 | CHORUA KARTIKSAIL::IRGC 77230-1     |
| 43 | 120914 | CHUA DAU::IRGC 4785-1               |
| 44 | 122011 | CICA 8::C1                          |
| 45 | 120916 | CIMARRON::IRGC 116967-1             |
| 46 | 117691 | CO 18                               |
| 47 | 117454 | CO 39::IRGC 51231-1                 |
| 48 | 122025 | CT 6510-24-1-2::C1                  |
| 49 | 121237 | DA 29 (SR 26 B)::IRGC 25850-1       |
| 50 | 120924 | DA 5::IRGC 5855-1                   |
| 51 | 117460 | DA 9::IRGC 5854-1                   |
| 52 | 120925 | DA NUO (ZHAN)::IRGC 72024-1         |
| 53 | 121169 | DALIFODE::IRGC 57766-1              |
| 54 | 122029 | DANAU LAUT TAWAR::C1                |
| 55 | 117463 | DE ABRIL::IRGC 50463-1              |
| 56 | 120929 | DENG DENG QI::IRGC 72671-1          |
| 57 | 120939 | DJOGOLON DJOGOLON::IRGC 75577-1     |
| 58 | 120946 | E 5168::IRGC 68021-1                |
| 59 | 120947 | E ZI 124::IRGC 70215-1              |
| 60 | 120952 | EA HOUM::IRGC 12925-1               |
| 61 | 122042 | ELONI::C1                           |
| 62 | 120948 | ELWEE::IRGC 15565-1                 |
| 63 | 120949 | EMBRAPA 6 CHUI::IRGC 116981-1       |
| 64 | 117470 | FANDRAPOTSY::IRGC 10984-1           |
| 65 | 121663 | GAJPATI::IRGC 58981-1               |
| 66 | 121738 | GAMBIAKA KOKOUM::C1-G1              |
| 67 | 117478 | GIE 57::IRGC 8231-1                 |
| 68 | 120958 | GODA HEENATI::IRGC 31393-1          |
| 69 | 120959 | GOPAL::IRGC 61953-1                 |
| 70 | 117745 | GUAN-YIN-TSAN                       |
| 71 | 122076 | H 15-23-DA::C1                      |
| 72 | 120964 | HAO HOM::IRGC 12931-1               |
| 73 | 121743 | HASAN SERAI::IRGC 79564-C1-G1       |
| 74 | 120970 | HONG MI DONG MAO ZHAN::IRGC 68078-1 |
| 75 | 120972 | HONG ZUI ZAO::IRGC 68090-1          |
| 76 | 122080 | IAC 165::GERVEX 8508-C1             |
| 77 | 120977 | ICTA POLOCHIC::IRGC 116997-1        |
| 78 | 120979 | INIAP 415::IRGC 117001-1            |
| 79 | 122088 | IR 1561-228-3-3::IRGC 32627-C1      |
| 80 | 122089 | IR 19746-28-2-2::IRGC 78072-C1      |
| 81 | 122090 | IR 20::C1                           |
| 82 | 121748 | IR 2006-P12-12-2::IRGC 32675-C1-G1  |
| 83 | 122091 | IR 22::IRGC 11356-C1                |
| 84 | 122093 | IR 2344-P1 PB-9-3-2B::IRGC 39317-C1 |
| 85 | 122094 | IR 28::IRGC 30411-C1                |
| 86 | 120981 | IR 31917-45-3-2::IRGC 78132-1       |
| 87 | 120982 | IR 32453-20-3-2-2::IRGC 76331-1     |
| 88 | 117757 | IR 36                               |
| 89 | 120983 | IR 43::IRGC 117005-1                |
| 90 | 121591 | IR 5::IRGC 10321-1                  |

|     |        |                                        |
|-----|--------|----------------------------------------|
| 91  | 121750 | IR 50::C1-G1                           |
| 92  | 121751 | IR 52::IRGC 53434-C1-G1                |
| 93  | 122096 | IR 53236-275-1::C1                     |
| 94  | 121752 | IR 55419-04::C1-G1                     |
| 95  | 122098 | IR 57920-AC 25-2-B::C1                 |
| 96  | 122099 | IR 57924-24::IRTP 16675-C1             |
| 97  | 120984 | IR 59469-2B-3-2::IRGC 99703-1          |
| 98  | 121753 | IR 60::IRGC 63493-C1-G1                |
| 99  | 121760 | IR 72::C1-G1                           |
| 100 | 120986 | IR 74371-3-1-1::IRGC 117373-1          |
| 101 | 122112 | IR 74371-54-1-1::C1                    |
| 102 | 120987 | IR 77298-14-1-2::IRGC 117374-1         |
| 103 | 120988 | IR 77384-12-35-3-12-1-B::IRGC 117299-1 |
| 104 | 117758 | IR 8                                   |
| 105 | 117268 | IR64-21                                |
| 106 | 120994 | J 104::IRGC 117008-1                   |
| 107 | 121771 | JAMAJIGI::C1-G1                        |
| 108 | 120998 | JARIYU::IRGC 53265-1                   |
| 109 | 121881 | JC 120::IRGC 9178-1                    |
| 110 | 117500 | JC 91::IRGC 9177-1                     |
| 111 | 117501 | JC 92::IRGC 9176-1                     |
| 112 | 121001 | JINLING 78-102::IRGC 88421-1           |
| 113 | 121774 | KALINGA III::C1-G1                     |
| 114 | 121010 | KANNI MURUNGA::IRGC 15432-1            |
| 115 | 121011 | KARAYAL::IRGC 51001-1                  |
| 116 | 121015 | KATI::IRGC 67838-1                     |
| 117 | 121016 | KAUKHMWE::IRGC 33174-1                 |
| 118 | 121019 | KHAO DAW TAI::IRGC 24108-1             |
| 119 | 121235 | KHAO DAWK MALI 105::IRGC 27748-1       |
| 120 | 121020 | KHAO PON::IRGC 48114-1                 |
| 121 | 117784 | KIANG-CHOU-CHIU                        |
| 122 | 121023 | KINANDANG PUTI::IRGC 44513-1           |
| 123 | 121024 | KIRIMURUNGA::IRGC 15585-1              |
| 124 | 122140 | KOGONI 91-1::C1                        |
| 125 | 121028 | KUMBI::IRGC 752-1                      |
| 126 | 117793 | KUN-MIN-TSIEH-HUNAN                    |
| 127 | 117520 | LAGEADO::IRGC 50490-1                  |
| 128 | 117521 | LAL AMAN::IRGC 46202-1                 |
| 129 | 121040 | LIU XU::IRGC 74099-1                   |
| 130 | 121785 | LOHAMBITRO 224::GERVEX5144-C1-G1       |
| 131 | 121041 | LOKU SAMBA::IRGC 31462-1               |
| 132 | 121042 | LONG ZI 1::IRGC 63726-1                |
| 133 | 121043 | LUA TAU DUC::IRGC 16872-1              |
| 134 | 121044 | MA GU ZI HE::IRGC 68212-1              |
| 135 | 121045 | MA WAINE OHN::IRGC 33357-1             |
| 136 | 122156 | MACAN BINUNDOK::IRGC 8245-C1           |
| 137 | 117525 | MADAEL::IRGC 7722-1                    |
| 138 | 121172 | MAHADETHE::IRGC 74762-1                |
| 139 | 121420 | MAHSURI::IRGC 10929-1                  |

|     |        |                                                  |
|-----|--------|--------------------------------------------------|
| 140 | 117527 | MAKALIOKA 34::IRGC 6087-1                        |
| 141 | 121049 | MAKALIOKA::IRGC 77864-1                          |
| 142 | 122159 | MAMORIAKA 114::GERVEX 5176-C1                    |
| 143 | 121050 | MANDRIRAVINA::IRGC 69960-1                       |
| 144 | 121794 | MANGAVAVA FOTSILANSTSIKA 1177::GERVEX 5719-C1-G1 |
| 145 | 121051 | MAURITIUS LOCAL::IRGC 5834-1                     |
| 146 | 121052 | MENAKELY::IRGC 69963-1                           |
| 147 | 121053 | MG 2::IRGC 79837-1                               |
| 148 | 117531 | MILYANG 23::IRGC 34393-1                         |
| 149 | 117271 | Minghui 63                                       |
| 150 | 121059 | MOTTA SAMBA::IRGC 36489-1                        |
| 151 | 117533 | MTU 9::IRGC 7919-1                               |
| 152 | 117817 | MTU9                                             |
| 153 | 121062 | NAKABAWA::IRGC 70676-1                           |
| 154 | 122178 | NAM ROO::C1                                      |
| 155 | 122179 | NAM SA GUI 19::IRTP 6892-C1                      |
| 156 | 121063 | NAN TE 113::IRGC 70345-1                         |
| 157 | 121064 | NARGUNI::IRGC 74713-1                            |
| 158 | 121065 | NARU HATHIYAL::IRGC 15547-1                      |
| 159 | 121066 | NCS 130::IRGC 51879-1                            |
| 160 | 121576 | NGAJA::IRGC 64917-1                              |
| 161 | 121799 | NIONOKA::C1-G1                                   |
| 162 | 122181 | NONA BOKRA::IRGC 22710-C1                        |
| 163 | 121070 | NORUNKAN::IRGC 8934-1                            |
| 164 | 121073 | NS 113::IRGC 68838-1                             |
| 165 | 121074 | NS 1611::IRGC 68963-1                            |
| 166 | 117826 | O-LUEN-CHEUNG                                    |
| 167 | 117829 | ORYZICA LLANOS 5                                 |
| 168 | 121632 | ORYZICA SABANA 10::IRGC 117018-1                 |
| 169 | 121077 | PANAKALI::IRGC 47399-1                           |
| 170 | 117840 | PAO TOU HUNG                                     |
| 171 | 117841 | PAPPAKU                                          |
| 172 | 121079 | PATCHAIPERUMAL::IRGC 15681-1                     |
| 173 | 117555 | PATIK::IRGC 43530-1                              |
| 174 | 121080 | PAWHTUN::IRGC 33562-1                            |
| 175 | 121804 | PCT 11\0\02,BO 1>55-1-3-1::C1-G1                 |
| 176 | 121807 | PEH PI NUO::IRGC 8266-C1-G1                      |
| 177 | 117848 | PEH-KUH                                          |
| 178 | 117849 | PEH-KUH-TSAO-TU                                  |
| 179 | 121889 | PELITA JANGGUT::IRGC 43540-1                     |
| 180 | 121083 | PERUM KARUPPAN::IRGC 15524-1                     |
| 181 | 117559 | PETA::IRGC 32571-1                               |
| 182 | 121085 | PICONEGRO::IRGC 117022-1                         |
| 183 | 117560 | PIN KAE0::IRGC 5803-1                            |
| 184 | 117561 | PIN TAWNG::IRGC 40673-1                          |
| 185 | 121087 | PINURSIGI::IRGC 26889-1                          |
| 186 | 122206 | POKKALI::IRGC 108921-C1                          |
| 187 | 121808 | POPOT::IRGC 43545-C1-G1                          |
| 188 | 121089 | PSBRC 18::IRGC 117375-1                          |

|     |        |                                     |
|-----|--------|-------------------------------------|
| 189 | 117563 | PTB 25::IRGC 6386-1                 |
| 190 | 117564 | PTB 9::IRGC 6274-1                  |
| 191 | 121091 | PURBIA (KALANSAR)::IRGC 59189-1     |
| 192 | 121092 | QING GU::IRGC 59839-1               |
| 193 | 121093 | QING SHUI ZAO::IRGC 72807-1         |
| 194 | 121094 | RACE::IRGC 15706-1                  |
| 195 | 121095 | RAJ BHOG::IRGC 77294-1              |
| 196 | 121098 | RATHKANDIRAM::IRGC 36507-1          |
| 197 | 117567 | RATHUWEE::IRGC 8952-1               |
| 198 | 121099 | RAY JAZAYKAYZ::IRGC 62181-1         |
| 199 | 121100 | RAY NABJA::IRGC 62184-1             |
| 200 | 121101 | RED PIE BOLD 17-214::IRGC 38207-1   |
| 201 | 121811 | ROJOFOTSY 693::GERVEX 8407-C1-G1    |
| 202 | 121812 | ROJOMENA 1034::GERVEX 8412-C1-G1    |
| 203 | 121102 | RR 166-645::IRGC 117352-1           |
| 204 | 117622 | RTS 14                              |
| 205 | 117574 | RTS 4::IRGC 8177-1                  |
| 206 | 121104 | RTS 5::IRGC 8233-1                  |
| 207 | 121105 | RUZZ (HABUR)::IRGC 55679-1          |
| 208 | 121106 | SADA DANGA BORO::IRGC 77298-1       |
| 209 | 117276 | Sadu Cho                            |
| 210 | 122232 | SAHEL 108::C1                       |
| 211 | 121942 | SAHEL 159::C1-G1                    |
| 212 | 121821 | SAHELIKA::C1-G1                     |
| 213 | 122236 | SALUMPIKIT::IRTP 4777-C1            |
| 214 | 122239 | SAMBALA MALO::C1                    |
| 215 | 121110 | SAN DU BAI MI HONG GU::IRGC 59849-1 |
| 216 | 121111 | SAN RI QI::IRGC 59855-1             |
| 217 | 121639 | SAO::IRGC 61467-1                   |
| 218 | 121945 | SATHI 34-36::C1-G1                  |
| 219 | 117880 | SERATOES HARI                       |
| 220 | 117881 | SHAI-KUH                            |
| 221 | 117277 | Shan-Huang-Zhan-2                   |
| 222 | 121118 | SHONTH::IRGC 74717-1                |
| 223 | 121122 | SOKOU MALSIRA::IRGC 77301-1         |
| 224 | 121642 | SOM CAU 70 A::IRGC 8227-1           |
| 225 | 121124 | SOMIMADAMO::IRGC 69044-1            |
| 226 | 121823 | SOMIZY::GERVEX 8419-C1-G1           |
| 227 | 122255 | SONA::IRGC 26971-C1                 |
| 228 | 121127 | SUDUWEE::IRGC 8972-1                |
| 229 | 121130 | SURMANIYA::IRGC 61148-1             |
| 230 | 121131 | SUTHUWEE::IRGC 8915-1               |
| 231 | 122258 | SWARNA::IRGC 117278-C1              |
| 232 | 121133 | T 26::IRGC 46768-1                  |
| 233 | 117907 | TAICHUNG NATIVE 1                   |
| 234 | 117587 | TD 25::IRGC 9146-1                  |
| 235 | 121827 | TELIMANI::C1-G1                     |
| 236 | 121136 | TELOVOLANA::IRGC 69969-1            |
| 237 | 117912 | TEQING                              |

|     |        |                                       |
|-----|--------|---------------------------------------|
| 238 | 117589 | TETEP::IRGC 32576-1                   |
| 239 | 121225 | THAPACHINIYA::IRGC 16234-1            |
| 240 | 121137 | TI KU::IRGC 1224-1                    |
| 241 | 117915 | TKM 6                                 |
| 242 | 121139 | TNAU 7456::IRGC 39858-1               |
| 243 | 121829 | TOKAMBANY 663::GERVEX 8358-C1-G1      |
| 244 | 121830 | TOKAMBANY 669::GERVEX 8406-C1-G1      |
| 245 | 121140 | TSIAMPOETRY::IRGC 77902-1             |
| 246 | 121834 | TSIPALA FOTSY 1883::GERVEX 5387-C1-G1 |
| 247 | 121141 | TSIPALA FOTSY::IRGC 69973-1           |
| 248 | 121142 | TSIPALA MENA::IRGC 69977-1            |
| 249 | 121144 | TSIPALA::IRGC 10989-1                 |
| 250 | 121145 | TUNG CH'IU AI::IRGC 34265-1           |
| 251 | 121146 | UBA MURALI::IRGC 25928-1              |
| 252 | 121147 | UP 1537::IRGC 70490-1                 |
| 253 | 121835 | UPL RI 5::IRTP 7034-C1-G1             |
| 254 | 122272 | UPL RI 7::IRTP 9897-C1                |
| 255 | 117598 | VANDANA::IRGC 117398-1                |
| 256 | 121836 | VARY MADINIKA 3494::GERVEX 8318-C1-G1 |
| 257 | 121839 | VARY VATO 154::GERVEX 5429-C1-G1      |
| 258 | 121151 | VARY VATO MENAHODITRA::IRGC 69111-1   |
| 259 | 121840 | VATO MATSOAMALONA::GERVEX 8454-C1-G1  |
| 260 | 121152 | VELLAI SEENETTI::IRGC 15516-1         |
| 261 | 121844 | WAB 706-3-4-K4-KB-1::C1-G1            |
| 262 | 121153 | WANNI DAHANALA::IRGC 15721-1          |
| 263 | 121846 | WAS 169-B-B-4-2-1::C1-G1              |
| 264 | 122284 | WAS 170-B-B-1-1::C1                   |
| 265 | 122285 | WAS 173-B-B-6-2-2::C1                 |
| 266 | 122286 | WAS 174-B-3-5::C1                     |
| 267 | 121847 | WAS 181-B-6-3::C1-G1                  |
| 268 | 121848 | WAS 182-B-1-1::C1-G1                  |
| 269 | 121849 | WAS 183-B-6-2-3::C1-G1                |
| 270 | 121850 | WAS 194-B-3-2-5::C1-G1                |
| 271 | 121851 | WAS 197-B-6-3-11::C1-G1               |
| 272 | 122287 | WAS 198-B-3-1-3::C1                   |
| 273 | 122288 | WAS 199-B-1-2-1::C1                   |
| 274 | 121852 | WAS 200-B-B-1-1-1::C1-G1              |
| 275 | 121853 | WAS 202-B-B-1-1-2::C1-G1              |
| 276 | 122289 | WAS 203-B-B-2-4-1::C1                 |
| 277 | 122290 | WAS 206-B-B-2-2-1::C1                 |
| 278 | 121854 | WAS 207-B-B-3-1-1::C1-G1              |
| 279 | 121855 | WAS 208-B-B-5-1-1-3::C1-G1            |
| 280 | 121856 | WAS 20-B-B-1-2-2::C1-G1               |
| 281 | 122291 | WAS 21-B-B-20-4-3-3::C1               |
| 282 | 121857 | WAS 30-11-4-6-2-2-1::C1-G1            |
| 283 | 122292 | WAS 33-B-B-15-1-4-5::C1               |
| 284 | 121858 | WAS 62-B-B-17-1-1-3::C1-G1            |
| 285 | 122297 | WAS 63-22-5-9-10-1::C1                |
| 286 | 122298 | WAY RAREM::IRTP 23013-C1              |



|     |        |                               |
|-----|--------|-------------------------------|
| 287 | 121156 | XI GU HONG::IRGC 74226-1      |
| 288 | 121176 | XI GU ZAO::IRGC 72360-1       |
| 289 | 121157 | XI NUO ZAO::IRGC 68279-1      |
| 290 | 121158 | YAKADA::IRGC 51096-1          |
| 291 | 121159 | YE TI ZHAN::IRGC 68296-1      |
| 292 | 121161 | ZALCHA::IRGC 62190-1          |
| 293 | 121162 | ZAO SHAO ZHAN::IRGC 68318-1   |
| 294 | 121163 | ZAO SHOU 691-11::IRGC 70447-1 |
| 295 | 117280 | Zhenshan 97B                  |
| 296 | 121164 | ZI GAN NAN GU::IRGC 70468-1   |
| 297 | 121165 | ZS 4::IRGC 56707-1            |

**aus**

| Seq.No. | Acc.No | Acc.Name        |
|---------|--------|-----------------|
| 1       | 28425  | 182             |
| 2       | 28364  | 29 A-2          |
| 3       | 7738   | ANDIKULAN       |
| 4       | 56562  | ANGALAIS        |
| 5       | 74720  | ANOOPA          |
| 6       | 20709  | ARC 10100       |
| 7       | 12386  | ARC 10177       |
| 8       | 12430  | ARC 10317       |
| 9       | 42572  | ARC 10319       |
| 10      | 12440  | ARC 10352       |
| 11      | 20887  | ARC 10376       |
| 12      | 12683  | ARC 10955       |
| 13      | 21477  | ARC 11559       |
| 14      | 21618  | ARC 11755       |
| 15      | 21634  | ARC 11772       |
| 16      | 21780  | ARC 11959       |
| 17      | 41001  | ARC 12071       |
| 18      | 41391  | ARC 14088       |
| 19      | 42019  | ARC 15340       |
| 20      | 12282  | ARC 6578        |
| 21      | 20499  | ARC 7099        |
| 22      | 12331  | Arc 7229        |
| 23      | 33983  | ASAHI           |
| 24      | 6591   | Aswina 330      |
| 25      | 29016  | aus 196         |
| 26      | 29049  | aus 257         |
| 27      | 28904  | aus 41          |
| 28      | 29221  | aus 439         |
| 29      | 28918  | aus 55          |
| 30      | 28934  | aus 71          |
| 31      | 25833  | aus JHARI       |
| 32      | 66767  | aus JOTA        |
| 33      | 61909  | BAGETAULI       |
| 34      | 25835  | BAILAM          |
| 35      | 12884  | Bala (CR 42-38) |
| 36      | 6538   | BAMOIA 341      |

|    |       |                     |
|----|-------|---------------------|
| 37 | 74728 | BANS 4              |
| 38 | 27509 | BARAN BORO          |
| 39 | 27798 | Basmati 1           |
| 40 | 25838 | BATHURI             |
| 41 | 64766 | BAULAN              |
| 42 | 34737 | BAWOI               |
| 43 | 33990 | BEGUM               |
| 44 | 25839 | BENAFUL             |
| 45 | 25840 | BENAMURI            |
| 46 | 6588  | BHADOIA 303         |
| 47 | 6551  | BHADOIA 685         |
| 48 | 66830 | BHORIA <i>aus</i>   |
| 49 | 74733 | BIRANJ              |
| 50 | 3711  | BJ1                 |
| 51 | 40275 | Black Gora (NCS 12) |
| 52 | 49022 | BOILAN              |
| 53 | 31572 | BOLIUM              |
| 54 | 34682 | BOTESHAWAR          |
| 55 | 78238 | BRE JER             |
| 56 | 45234 | BROWN GORA          |
| 57 | 6349  | CA 902-B-2-1        |
| 58 | 25845 | CHANDARHAT          |
| 59 | 73091 | CHAWAL              |
| 60 | 77228 | CHENGRI 2           |
| 61 | 66774 | CHENGRI MURALI      |
| 62 | 52101 | CHIADI NAKI         |
| 63 | 64771 | CHIKON SHONI        |
| 64 | 17052 | Chuan 4             |
| 65 | 25855 | CHUNGUR BALI        |
| 66 | 45374 | CN10183-S/C-244     |
| 67 | 45336 | CROSS 4-244         |
| 68 | 8704  | CTG 1516            |
| 69 | 6246  | DA28                |
| 70 | 6422  | DA8                 |
| 71 | 58943 | DAINY               |
| 72 | 25849 | DAL KASHAI          |
| 73 | 76296 | DANGAR              |
| 74 | 8626  | DD 62               |
| 75 | 74737 | DEHULA              |
| 76 | 66776 | DHAL KACHAI         |
| 77 | 77236 | DHALA BAGDAR 2      |
| 78 | 66779 | DHALA BHADOI        |
| 79 | 25851 | DHALASHAITA         |
| 80 | 60530 | DHALI KHAMA         |
| 81 | 3681  | DHAN                |
| 82 | 64773 | DHARIA              |
| 83 | 64774 | DHARIA BOALIA       |
| 84 | 64775 | DHEKI SHAITA        |
| 85 | 27513 | DHOLI BORO          |

|     |        |                        |
|-----|--------|------------------------|
| 86  | 8455   | DJ 123                 |
| 87  | 8506   | DJ 24                  |
| 88  | 8581   | DK 12                  |
| 89  | 8769   | DM 43                  |
| 90  | 8787   | DM 56                  |
| 91  | 8428   | DNJ 140                |
| 92  | 16261  | DUDHI SAROO            |
| 93  | 636    | DULAR                  |
| 94  | 32561  | DULAR                  |
| 95  | 25852  | DUMAI                  |
| 96  | 8861   | DV 123                 |
| 97  | 8839   | DV85                   |
| 98  | 8517   | DZ193                  |
| 99  | 8555   | DZ78                   |
| 100 | 36148  | ETYM                   |
| 101 | 117267 | FR 13 A                |
| 102 | 6144   | FR 13A                 |
| 103 | 8887   | FR13 A                 |
| 104 | 66783  | FULKATI                |
| 105 | 73098  | GADRA                  |
| 106 | 73099  | GADRA                  |
| 107 | 25854  | GARIA                  |
| 108 | 32300  | GERDEH                 |
| 109 | 58278  | GHATI KAMMA NANGARHAR  |
| 110 | 19740  | GO CHEON DO            |
| 111 | 49189  | GOAI                   |
| 112 | 66787  | Gochi Boro             |
| 113 | 66791  | GORBAI                 |
| 114 | 66792  | GUL MURALI             |
| 115 | 8961   | H4                     |
| 116 | 10873  | Habigonj Boro 6        |
| 117 | 74744  | HARBHOONDI             |
| 118 | 14737  | Harlan No. 25A         |
| 119 | 16817  | HASAWI                 |
| 120 | 8942   | HEENBALAWEE            |
| 121 | 52441  | HEGRA                  |
| 122 | 67631  | HODARAWALA             |
| 123 | 64778  | HOLOI BASH(SOLOI BASH) |
| 124 | 53989  | IC27525                |
| 125 | 77250  | IKRA                   |
| 126 | 25865  | JABARSHAIL             |
| 127 | 66831  | JABOR SAIL             |
| 128 | 66861  | JABOR SAIL             |
| 129 | 27516  | Jagli Boro             |
| 130 | 73101  | JAMBALI                |
| 131 | 73102  | JAMBALI BUSSA          |
| 132 | 37117  | JAMRI                  |
| 133 | 9069   | JC148                  |
| 134 | 27967  | JHONA 26               |

|     |       |                     |
|-----|-------|---------------------|
| 135 | 3742  | JHONA 349           |
| 136 | 6307  | JHONA 349           |
| 137 | 25867 | JHUM BEGUNBICHI     |
| 138 | 25868 | JHUM FULBADAM       |
| 139 | 25874 | JHUM SONALICHIKON   |
| 140 | 66800 | JUMA                |
| 141 | 64780 | KAL SHONI           |
| 142 | 34959 | KALA SANI           |
| 143 | 45975 | KALAMKATI           |
| 144 | 77201 | KALIBORO            |
| 145 | 66806 | KALO KUCHI          |
| 146 | 49746 | KALU A. 30          |
| 147 | 7702  | KALUBALA VEE        |
| 148 | 7755  | Kalukantha          |
| 149 | 67019 | KAMAZ               |
| 150 | 73105 | KANGRO              |
| 151 | 6618  | Karkati 87          |
| 152 | 47381 | KARUTHA CHEENEDDI   |
| 153 | 74751 | KASAPUR             |
| 154 | 64781 | KAT GIMI            |
| 155 | 9007  | Kaukau              |
| 156 | 34983 | KELE BARDHAN        |
| 157 | 66807 | KELEE               |
| 158 | 54072 | Khadasiya 3 (Straw) |
| 159 | 27748 | KHAO DAWK MALI 105  |
| 160 | 66808 | KHARAI MURALI       |
| 161 | 28016 | KHARSU 80           |
| 162 | 28598 | KOALARETA           |
| 163 | 66811 | KOI MURALI          |
| 164 | 77267 | KOYRA               |
| 165 | 15449 | KURKARUPPAN         |
| 166 | 66518 | KURULU WEE(WHITE)   |
| 167 | 34712 | LAKHI PURI          |
| 168 | 25885 | LAKHSNIKAJAL        |
| 169 | 43915 | LALSAITA            |
| 170 | 66815 | LENJA MURALI        |
| 171 | 27762 | Leuang Pratew       |
| 172 | 29374 | MADHABSAIL 741      |
| 173 | 51021 | MAHA PANNITHI       |
| 174 | 6427  | MAHLAR 346          |
| 175 | 52696 | MAHSURI             |
| 176 | 12883 | Mehr                |
| 177 | 61011 | MEKRA BHOL          |
| 178 | 34722 | MERY                |
| 179 | 25888 | MICOCHU             |
| 180 | 25893 | MIKOTCHU            |
| 181 | 25901 | MIRITI              |
| 182 | 27571 | MI-TIMBRA           |
| 183 | 25906 | MOLLADIGHA          |

|     |        |                       |
|-----|--------|-----------------------|
| 184 | 66817  | MOSHIA BHADOI         |
| 185 | 64789  | MOSHUR                |
| 186 | 66818  | MOYNA MOTI            |
| 187 | 66819  | MUNSHI MURALI         |
| 188 | 36333  | MUTTU SAMBA           |
| 189 | 4819   | N 22                  |
| 190 | 6264   | N 22                  |
| 191 | 19379  | N 22                  |
| 192 | 46458  | N 22                  |
| 193 | 46459  | N 22                  |
| 194 | 117273 | N 22                  |
| 195 | 64792  | NARIKEL JHUPI         |
| 196 | 51903  | NCS160                |
| 197 | 51923  | NCS183                |
| 198 | 62530  | NCS840                |
| 199 | 31611  | NOROI                 |
| 200 | 32559  | NP125                 |
| 201 | 68925  | NS 1254               |
| 202 | 28134  | P 660                 |
| 203 | 28171  | P 737                 |
| 204 | 27209  | PAEDAI MESARAHA       |
| 205 | 25911  | PANKHIRAJ             |
| 206 | 66527  | PANNITI               |
| 207 | 66526  | PANNITTI              |
| 208 | 6252   | Paung Malaung C 3     |
| 209 | 32571  | PETA                  |
| 210 | 32399  | PHUDUGEY              |
| 211 | 36345  | PODI HEENATI          |
| 212 | 6304   | PTB30                 |
| 213 | 77530  | Puluthi Karan (Mixed) |
| 214 | 14487  | RADIN PAHANG          |
| 215 | 64793  | RAKHOIL               |
| 216 | 66822  | RANGPURI <i>aus</i>   |
| 217 | 77210  | RAYADA                |
| 218 | 77298  | Sada Danga Boro       |
| 219 | 73118  | SADA SOLAY            |
| 220 | 74775  | SAFED MACAN           |
| 221 | 25920  | SAMPATTI              |
| 222 | 28212  | SANTHI SUFAID 207     |
| 223 | 67757  | SAREINA               |
| 224 | 28229  | SATHI                 |
| 225 | 28239  | SATHRA 278            |
| 226 | 74716  | SAYARI                |
| 227 | 47414  | SEENETTI              |
| 228 | 34732  | SERETY                |
| 229 | 64796  | SHADA SHAITA          |
| 230 | 74777  | SHANKAR               |
| 231 | 14528  | SHIRKATI              |
| 232 | 35154  | SIMUL KHURI           |

|     |       |                   |
|-----|-------|-------------------|
| 233 | 5418  | SINTANE DIOFOR    |
| 234 | 63    | SLO 16            |
| 235 | 52763 | SOKANA            |
| 236 | 73121 | SOLAY GHAT        |
| 237 | 37598 | SOLOI             |
| 238 | 64799 | SREERAMPUR SHAITA |
| 239 | 28303 | SUFAID 246        |
| 240 | 25924 | SULTANJATA        |
| 241 | 35166 | SURJA MUKHI       |
| 242 | 8256  | SURJAMKUIHI       |
| 243 | 6294  | T 1               |
| 244 | 46768 | T 26              |
| 245 | 73124 | TAK               |
| 246 | 73126 | TAK SIAH          |
| 247 | 73127 | TAK SUFAID        |
| 248 | 13746 | TAOTHABI          |
| 249 | 32362 | TCHAMPA           |
| 250 | 25925 | TEPAKAIN          |
| 251 | 27519 | TEPI BORO         |
| 252 | 15325 | THAVALU           |
| 253 | 44229 | UPRB56            |
| 254 | 61631 | UPRH184           |
| 255 | 74719 | URYEE BOOTA       |
| 256 | 67661 | WEDA HEENATI      |

**Supplementary Table 5: Genotypic and phenotypic information for the two different GWAS models used.**

Two sets of genotypic information were used for the *indica* panel - ‘GBS 40K SNP’ and ‘700K SNP’ - with their respective number of accessions and total number of SNPs. One set of genotypic information was used for the *aus* panel. The total number of accessions phenotyped is also given. Model 1 refers to the conventional MLM model and model 2 refers to the Interaction model.

|                           | <i>indica</i> |            | <i>aus</i> |            | <i>INDAUS</i> |            |
|---------------------------|---------------|------------|------------|------------|---------------|------------|
| <b>Genotypic data</b>     | Accessions    | Total SNPs | Accessions | Total SNPs | Accessions    | Total SNPs |
| <b>GBS 40K SNP</b>        | 274           | 17,924     | -          | -          | -             | -          |
| <b>700K SNP (model 1)</b> | 228           | 397,659    | 146        | 394,786    | 374           | 304,877    |
| <b>700K SNP (model 2)</b> | 228           | 19,436     | 146        | 16,538     | 372           | 5,560      |

**Supplementary Table 6: Summary of candidate genes and local linkage disequilibrium (LD) region underlying SNPs from the suggestive threshold  $P = 10^{-5}$  for transpiration use efficiency (TUE) using the mixed linear model (MLM). All the significant associations are presented for the three diversity panels (*indica*, *aus* and *INDAUS*) and intervals (2-9; 2-6; 6-9; 9-13 days after treatment)**

| Model            | Chrom.             | Population      | Trait                 | Time interval for days after treatment                             | QTL region (bp)    | SNP ID                | P-value               | Candidate gene                          |
|------------------|--------------------|-----------------|-----------------------|--------------------------------------------------------------------|--------------------|-----------------------|-----------------------|-----------------------------------------|
| Conventional MLM | 3                  | <i>Indica</i>   | TUE (TOL)             | 2-9                                                                | 32593832..32595034 | SNP-3.32587904.       | $8.72 \times 10^{-6}$ | Os03g57160 (Zinc ion binding protein)   |
|                  |                    |                 | TUE (TOL)             | 2-6                                                                | 32595034..32602359 | in LD region          |                       | Os03g57170 (cell cycle control protein) |
|                  |                    |                 | TUE (S/C)             | 6-9                                                                | 27042766..27050145 | in LD region          |                       | Os03g47720 (Ankyrin)                    |
|                  |                    |                 | TUE (TOL)             | 6-9                                                                | 13135925           | SNP-3.13134642.       | $6.70 \times 10^{-6}$ | Os03g22740 (nucleolar protein NOP5-1)   |
|                  |                    | <i>INDAUS</i>   | TUE (S/C)             | 6-9                                                                | 26991428..27012332 | in LD region          |                       | Os03g47650 (Ankyrin)                    |
|                  |                    |                 |                       |                                                                    |                    | in LD region          |                       | Os03g47670 (Ankyrin)                    |
|                  |                    |                 |                       |                                                                    |                    | SNP-3.27005384.       | $4.20 \times 10^{-6}$ | Os03g47686 (Ankyrin)                    |
|                  |                    |                 |                       |                                                                    |                    | SNP-3.27039880.       | $7.25 \times 10^{-6}$ | Os03g47720 (Ankyrin)                    |
|                  | 27046828..27054059 | in LD region    |                       | Os03g47730 (homeobox domain containing protein)                    |                    |                       |                       |                                         |
|                  |                    | in LD region    |                       | Os11g07230 (receptor kinase)                                       |                    |                       |                       |                                         |
|                  |                    | in LD region    |                       | Os11g07240 (serine/threonine-protein kinase BRI1-like 2 precursor) |                    |                       |                       |                                         |
|                  |                    | SNP-11.3637627. | $9.42 \times 10^{-6}$ | Os11g07050 (FHA domain containing protein)                         |                    |                       |                       |                                         |
| 11               | <i>Indica</i>      | TUE (TOL)       | 2-6                   | 3638272..3641726                                                   | SNP-11.3505660.    | $5.30 \times 10^{-7}$ |                       |                                         |
|                  |                    | TUE (TOL)       | 2-6                   | 3509758                                                            |                    |                       |                       |                                         |



|  |  |  |              |     |  |  |  |  |
|--|--|--|--------------|-----|--|--|--|--|
|  |  |  | TUE<br>(TOL) | 2-9 |  |  |  |  |
|  |  |  | TUE<br>(TOL) | 6-9 |  |  |  |  |

- 1 Hunt, R., Causton, D. R., Shipley, B. & Askew, A. P. A modern tool for classical plant growth analysis. *Ann Bot-London* **90**, 485-488 (2002).
- 2 Rosielle, A. A. & Hamblin, J. Theoretical aspects of selection for yield in stress and non-stress environments. *Crop Sci* **21**, 943-946 (1981).
- 3 Berger, B., de Regt, B. & Tester, M. Trait dissection of salinity tolerance with plant phenomics. *Methods Mol. Biol.* **913**, 399-413, doi:10.1007/978-1-61779-986-0\_27 (2012).
- 4 Fernandez, G. C. J. in *International Symposium on Adaptation of Food Crops to Temperature and Water Stress*. (ed CG Kuo) 257-270 (Asian Vegetable Research & Development CTR).
- 5 Crowell, S. *et al.* Genome-wide association and high-resolution phenotyping link *Oryza sativa* panicle traits to numerous trait-specific QTL clusters. *Nat Commun* **7**, 10527, doi:10.1038/ncomms10527 (2016).
- 6 Rebolledo, M. C. *et al.* Phenotypic and genetic dissection of component traits for early vigour in rice using plant growth modelling, sugar content analyses and association mapping. *Journal of Experimental Botany* **66**, 5555-5566 (2015).
